# Supplementary material for: Regioselective bromination of pyrrolo[1,2-a]quinoxalines
Source: Royal Society of Chemistry journal article supplement (doi:10.1039/d4ra07358d), 2024-01-01

## Regioselective Bromination of Pyrrolo[1,2-a]quinoxalines

Yingqian Li, Yali Liu, Di Hao, Liang Xu\* and Ping Liu\*

School of Chemistry and Chemical Engineering/Key Laboratory for Green Processing of Chemical  
Engineering of Xinjiang Bingtuan, Shihezi University, Shihezi 832004, China.

### Supporting Information

|                                    |    |
|------------------------------------|----|
| 1. Materials and instruments ..... | 2  |
| 2. Experimental Section.....       | 2  |
| 3. The NMR Spectra Data .....      | 3  |
| 4. Copies of Spectra .....         | 13 |

## 1. Materials and instruments

Unless otherwise noted, all commercial materials were used directly without further purification, and all reactions were performed in the air. For chromatography, Qingdao Ocean Chemical 200-300 mesh silica gel was employed. Melting points were determined with a fusimeter.  $^1\text{H}$  NMR and  $^{13}\text{C}$  NMR spectra were recorded on Bruker Avance III HD 400 MHz and Bruker Ascend™ 600 MHz spectrometer in  $\text{CDCl}_3$  and the chemical shifts are reported in ppm ( $\delta$ ) relative to the internal standard tetramethylsilane (TMS) (0 ppm). High-resolution mass spectra (HRMS) were acquired in atmospheric pressure chemical ionization (APCI) mode using a TOF mass analyzer.

## 2. Experimental Section

### General procedure for the C3-bromination of pyrrolo[1,2-*a*]quinoxaline with TBATB

A 10 mL Schlenk tube was charged with pyrrolo[1,2-*a*]quinoxaline 1 (0.2 mmol), TBATB (0.24 mmol) and MeCN (2.5 mL). The mixture was stirred at 80 °C for 12 hours. After completion of the reaction, the solution was quenched with a saturated solution of sodium thiosulfate (10 mL) and extracted with ethyl acetate (15 mL  $\times$  3). The organic layer was dried with anhydrous  $\text{Na}_2\text{SO}_4$  and the solvent was removed under reduced pressure, and the crude product was purified by rapid chromatography on silica gel (petroleum ether/ethyl acetate = 8:1) to give the final products **3a-3w**.

### General procedure for the dibromination of pyrrolo[1,2-*a*]quinoxaline with TBATB

A 10 mL Schlenk tube was charged with pyrrolo[1,2-*a*]quinoxaline 1 (0.2 mmol), TBATB (0.24 mmol) and DMSO (2.5 mL). The mixture was stirred at 80°C for 12 hours. After completion of the reaction, the solution was quenched with a saturated solution of sodium thiosulfate (10 mL) and extracted with ethyl acetate (15 mL  $\times$  3). The organic layer was dried with anhydrous  $\text{Na}_2\text{SO}_4$  and the solvent was removed under reduced pressure. The residue was purified from the crude product by rapid chromatography on silica gel (petroleum ether/ethyl acetate = 10:1) to give the final

products **5a-5f**.

#### **Gram-scale synthesis procedure for 3a**

To a 200 mL round-bottomed flask was added 1a (6 mmol), TBATB (7.2 mmol) and MeCN (50 mL). The solution was stirred at 100 °C for 12 hours. After completion of the reaction, the solution was quenched with a saturated solution of sodium thiosulfate (25 mL) and extracted with dichloromethane (30 mL × 3). The organic layer was dried with anhydrous Na<sub>2</sub>SO<sub>4</sub> and the solvent was removed under reduced pressure. The residue was purified by rapid chromatography on silica gel (petroleum ether/ethyl acetate = 8:1) to afford the final product **3a** (1.401 g, 95% yield).

#### **Palladium-catalyzed Suzuki-Miyaura reaction of 3a with phenylboronic acid**

To a 10 mL Schlenk tube was added **3a** (0.2 mmol) phenylboronic acid added to acid (0.4 mmol), Pd(PPh<sub>3</sub>)<sub>4</sub> (5 mol%), Na<sub>2</sub>CO<sub>3</sub> (2 equiv.) and 1,4-dioxane/H<sub>2</sub>O (4:1, 2.5 mL). The reaction vessel was stirred at 80 °C for 5 h under air atmosphere. Upon completion of the reaction, saturated aqueous NaCl solution (10 mL) was added to the reaction solution, followed by extraction with dichloromethane (15 mL × 3). The organic phase was dried with Na<sub>2</sub>SO<sub>4</sub> and the solvent was removed under reduced pressure. The residue was purified by rapid chromatography on silica gel (petroleum ether/ethyl acetate = 5:1) to give the final product **3aa**.

#### **Palladium-catalyzed C1-arylation of 3a with 4-iodotoluene**

A 10 mL Schlenk tube was filled with **3a** (0.25 mmol), 4-iodotoluene (0.5 mmol), Pd(OAc)<sub>2</sub> (10 mol%), X-Phos (15 mol%) and toluene (1 mL). The mixture was stirred in air at 120 °C for 24 hours. The reaction solution was concentrated under reduced pressure and the residue was purified by silica gel column chromatography (petroleum ether/ethyl acetate = 30:1) to give the final product **3ab**.

#### **C1-Chlorination of 3a**

A 10 mL Schlenk tube was charged with **3a** (0.2 mmol), 1-chloro-1,2-phenyliodono-3-one (0.24 mmol) and MeCN (2 mL). The mixture was then stirred at room temperature for 12 hours. After completion of the reaction, the solution was quenched with a saturated solution of sodium bicarbonate (10 mL) and extracted with dichloromethane (15 mL × 3). The organic layer was dried with

anhydrous Na<sub>2</sub>SO<sub>4</sub> and the solvent was removed under reduced pressure, and the residue was purified by rapid chromatography on silica gel (petroleum ether/ethyl acetate = 10:1) to give the final product **3ac**.

### 3. The NMR Spectra Data

#### 3-bromopyrrolo[1,2-*a*]quinoxaline [3a]

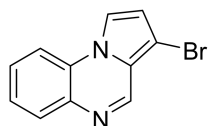

Mp. 166-171 °C. White solid (46.4 mg, 94%).

<sup>1</sup>H NMR (400 MHz, CDCl<sub>3</sub>) δ 8.81 (s, 1H), 8.01 (dd, *J* = 8.0, 1.6 Hz, 1H), 7.88 (d, *J* = 2.8 Hz, 1H), 7.84 (dd, *J* = 8.0, 1.6 Hz, 1H), 7.56 (td, *J* = 7.2, 1.2 Hz, 1H), 7.49 (td, *J* = 8.0, 1.2 Hz, 1H), 6.92 (d, *J* = 2.9 Hz, 1H).

<sup>13</sup>C NMR (101 MHz, CDCl<sub>3</sub>) δ 143.33, 137.03, 130.41, 128.85, 127.39, 126.50, 125.95, 120.86, 115.32, 99.35, 96.15.

HRMS (APCI): *m/z* calcd for C<sub>11</sub>H<sub>7</sub>BrN<sub>2</sub> [M+H]<sup>+</sup> : 246.9865, found: 246.9863.

#### 3-bromo-4-phenylpyrrolo[1,2-*a*]quinoxaline [3b]

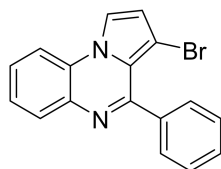

Mp. 161-166 °C. Light yellow solid (48.6 mg, 76%).

<sup>1</sup>H NMR (400 MHz, CDCl<sub>3</sub>) δ 8.03 (dd, *J* = 8.0, 1.2 Hz, 1H), 7.94 (d, *J* = 3.2 Hz, 1H), 7.83 (dd, *J* = 8.0, 1.2 Hz, 1H), 7.65-7.61 (m, 2H), 7.54 (dd, *J* = 7.2, 1.6 Hz, 1H), 7.51 (dd, *J* = 4.0, 2.4 Hz, 3H), 7.47 (td, *J* = 8.0, 1.2 Hz, 1H), 6.90 (d, *J* = 3.2 Hz, 1H).

<sup>13</sup>C NMR (101 MHz, CDCl<sub>3</sub>) δ 154.93, 137.49, 135.58, 130.36, 129.49, 129.37, 128.08, 128.05, 127.02, 125.87, 121.87, 118.21, 114.64, 113.14, 95.74.

HRMS (APCI): *m/z* calcd for C<sub>17</sub>H<sub>11</sub>BrN<sub>2</sub> [M+H]<sup>+</sup> : 323.0178, found: 323.0176.

#### 3-bromo-4-(*p*-tolyl)pyrrolo[1,2-*a*]quinoxaline [3c]



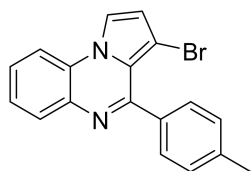

Mp. 174-179 °C. Light yellow solid (24.2 mg, 36%).

$^1\text{H}$  NMR (400 MHz,  $\text{CDCl}_3$ )  $\delta$  8.02 (dd,  $J = 8.0, 1.6$  Hz, 1H), 7.94 (d,  $J = 2.8$  Hz, 1H), 7.83 (dd,  $J = 8.0, 1.2$  Hz, 1H), 7.56-7.50 (m, 3H), 7.46 (td,  $J = 7.6, 1.6$  Hz, 1H), 7.31 (d,  $J = 8.0$  Hz, 2H), 6.91 (d,  $J = 3.2$  Hz, 1H), 2.46 (s, 3H).

$^{13}\text{C}$  NMR (101 MHz,  $\text{CDCl}_3$ )  $\delta$  154.37, 139.44, 136.77, 134.42, 130.32, 129.37, 128.80, 128.35, 126.79, 126.36, 124.46, 123.00, 115.24, 99.78, 96.75, 21.65.

HRMS (APCI):  $m/z$  calcd for  $\text{C}_{18}\text{H}_{13}\text{BrN}_2$   $[\text{M}+\text{H}]^+$  : 337.0335, found: 337.0330.

### 3-bromo-4-(4-methoxyphenyl)pyrrolo[1,2-a]quinoxaline [3d]

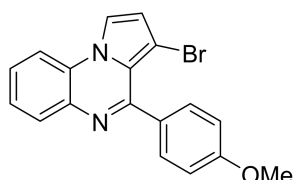

Mp. 167-169 °C. Light yellow solid (53.1 mg, 76%).

$^1\text{H}$  NMR (400 MHz,  $\text{CDCl}_3$ )  $\delta$  8.00 (dd,  $J = 8.0, 1.6$  Hz, 1H), 7.91 (d,  $J = 2.8$  Hz, 1H), 7.80 (dd,  $J = 8.0, 1.6$  Hz, 1H), 7.61 (d,  $J = 2.0$  Hz, 1H), 7.59 (d,  $J = 2.0$  Hz, 1H), 7.49 (td,  $J = 8.0, 1.6$  Hz, 1H), 7.44 (td,  $J = 7.6, 1.2$  Hz, 1H), 7.04 (d,  $J = 2.4$  Hz, 1H), 7.02 (d,  $J = 2.0$  Hz, 1H), 6.89 (d,  $J = 2.8$  Hz, 1H), 3.89 (s, 3H).

$^{13}\text{C}$  NMR (101 MHz,  $\text{CDCl}_3$ )  $\delta$  160.73, 154.54, 135.55, 131.08, 130.12, 129.87, 127.82, 126.85, 125.78, 121.94, 118.17, 114.64, 113.41, 113.07, 95.70, 55.45.

HRMS (APCI):  $m/z$  calcd for  $\text{C}_{18}\text{H}_{13}\text{BrN}_2\text{O}$   $[\text{M}+\text{H}]^+$  : 353.0284, found: 353.0280.

### 3-bromo-4-(4-chlorophenyl)pyrrolo[1,2-a]quinoxaline [3e]

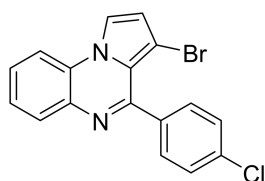

Mp. 199-201 °C. Light yellow solid (49.5 mg, 70%).

$^1\text{H}$  NMR (400 MHz,  $\text{CDCl}_3$ )  $\delta$  8.01 (dd,  $J = 8.0, 1.6$  Hz, 1H), 7.96 (d,  $J = 2.8$  Hz, 1H), 7.85 (dd,  $J = 8.0, 1.2$  Hz, 1H), 7.60-7.57 (m, 2H), 7.54 (dd,  $J = 8.4,$

1.6 Hz, 1H), 7.50-7.45 (m, 3H), 6.92 (d,  $J = 3.2$  Hz, 1H).

$^{13}\text{C}$  NMR (101 MHz,  $\text{CDCl}_3$ )  $\delta$  153.72, 135.92, 135.59, 135.51, 131.04, 130.40, 128.36, 128.33, 127.04, 126.03, 121.69, 118.33, 114.87, 113.22, 95.71 .

HRMS (APCI):  $m/z$  calcd for  $\text{C}_{17}\text{H}_{10}\text{BrClN}_2$   $[\text{M}+\text{H}]^+$  : 356.9789, found: 356.9762.

### 3-bromo-4-(4-bromophenyl)pyrrolo[1,2-*a*]quinoxaline [3f]

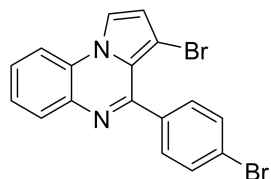

Mp. 202-205 °C. Light yellow solid (45.9 mg, 58%).

$^1\text{H}$  NMR (400 MHz,  $\text{CDCl}_3$ )  $\delta$  8.01 (dd,  $J = 8.0, 1.6$  Hz, 1H), 7.97 (d,  $J = 2.8$  Hz, 1H), 7.85 (dd,  $J = 8.0, 1.2$  Hz, 1H), 7.67-7.62 (m, 2H), 7.58-7.53 (m, 2H), 7.52-7.50 (m, 1H), 7.49-7.46 (m, 1H), 6.92 (d,  $J = 2.8$  Hz, 1H).

$^{13}\text{C}$  NMR (101 MHz,  $\text{CDCl}_3$ )  $\delta$  153.69, 136.26, 135.39, 131.30, 131.26, 130.32, 128.39, 127.00, 126.05, 123.91, 121.59, 118.36, 114.95, 113.23, 95.82.

HRMS (APCI):  $m/z$  calcd for  $\text{C}_{17}\text{H}_{10}\text{Br}_2\text{N}_2$   $[\text{M}+\text{H}]^+$  : 400.9284, found: 400.9261.

### 3-bromo-4-(4-fluorophenyl)pyrrolo[1,2-*a*]quinoxaline [3g]

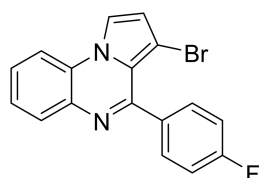

Mp. 174-176 °C. Light yellow solid (59.3 mg, 87%).

$^1\text{H}$  NMR (400 MHz,  $\text{CDCl}_3$ )  $\delta$  7.91 (dd,  $J = 8.0, 1.6$  Hz, 1H), 7.85 (d,  $J = 2.8$  Hz, 1H), 7.74 (dd,  $J = 8.0, 1.6$  Hz, 1H), 7.57-7.49 (m, 2H), 7.44 (td,  $J = 8.0, 7.6, 1.6$  Hz, 1H), 7.38 (td,  $J = 8.0, 7.6, 1.6$  Hz, 1H), 7.14-7.06 (m, 2H), 6.82 (d,  $J = 2.8$  Hz, 1H).

$^{13}\text{C}$  NMR (101 MHz,  $\text{CDCl}_3$ )  $\delta$  163.70 (d,  $J = 249.3$  Hz), 153.81, 135.43, 133.47 (d,  $J = 3.3$  Hz), 131.54 (d,  $J = 8.4$  Hz), 130.26, 128.20, 126.95, 125.94, 121.75, 118.26, 115.08 (d,  $J = 21.9$  Hz), 114.80, 113.15, 95.70.

$^{19}\text{F}$  NMR (376 MHz,  $\text{CDCl}_3$ )  $\delta$  -111.96.

HRMS (APCI):  $m/z$  calcd for  $\text{C}_{17}\text{H}_{10}\text{BrFN}_2$   $[\text{M}+\text{H}]^+$  : 341.0084, found:

341.0083.

**3-bromo-4-(4-nitrophenyl)pyrrolo[1,2-*a*]quinoxaline [3h]**

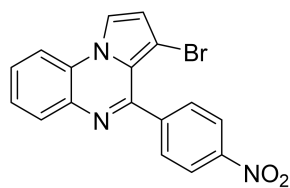

Mp. 244-249 °C. Yellow solid (69.1 mg, 94%).

<sup>1</sup>H NMR (400 MHz, CDCl<sub>3</sub>) δ 8.38 (d, *J* = 8.8 Hz, 2H), 8.07-8.00 (m, 2H), 7.90 (dd, *J* = 8.4, 0.8 Hz, 1H), 7.83 (d, *J* = 8.4 Hz, 2H), 7.61 (td, *J* = 8.4, 7.2, 1.2 Hz, 1H), 7.53 (td, *J* = 8.4, 7.2, 1.2 Hz, 1H), 6.97 (d, *J* = 2.8 Hz, 1H).

<sup>13</sup>C NMR (151 MHz, CDCl<sub>3</sub>) δ 152.57, 148.62, 143.70, 135.34, 130.86, 130.58, 128.98, 127.13, 126.32, 123.37, 121.35, 118.53, 115.27, 113.38, 95.67.

HRMS (APCI): *m/z* calcd for C<sub>17</sub>H<sub>10</sub>BrN<sub>3</sub>O<sub>2</sub> [M+H]<sup>+</sup> : 368.0029, found: 368.0027.

**3-bromo-4-(2,4-dichlorophenyl)pyrrolo[1,2-*a*]quinoxaline [3i]**

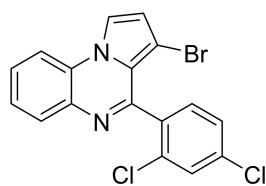

Mp. 137-141 °C. Light yellow solid (63.3 mg, 81%).

<sup>1</sup>H NMR (400 MHz, CDCl<sub>3</sub>) δ 8.03 (dd, *J* = 8.0, 1.6 Hz, 1H), 7.97 (d, *J* = 2.8 Hz, 1H), 7.87 (dd, *J* = 8.0, 1.2 Hz, 1H), 7.59 (td, *J* = 8.0, 1.2 Hz, 1H), 7.54 (t, *J* = 1.2 Hz, 1H), 7.50 (td, *J* = 8.0, 1.2 Hz, 2H), 7.41 (d, *J* = 1.6 Hz, 2H), 6.91 (d, *J* = 3.2 Hz, 1H);

<sup>13</sup>C NMR (101 MHz, CDCl<sub>3</sub>) δ 151.39, 136.02, 134.94, 131.64, 130.35, 129.47, 128.88, 127.37, 126.23, 121.88, 118.17, 115.17, 113.41.

HRMS (APCI): *m/z* calcd for C<sub>17</sub>H<sub>9</sub>BrCl<sub>2</sub>N<sub>2</sub> [M+H]<sup>+</sup> : 390.9398, found: 390.9395.

**3-bromo-1-phenylpyrrolo[1,2-*a*]quinoxaline [3j]**

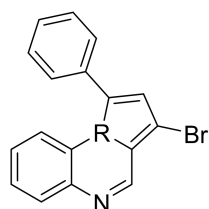

Mp. 153-158 °C. Light yellow solid (49.8 mg, 39%).

$^1\text{H}$  NMR (400 MHz,  $\text{CDCl}_3$ )  $\delta$  8.83 (s, 1H), 7.96 (dd,  $J = 8.0, 1.6$  Hz, 1H), 7.51 (t,  $J = 3.2$  Hz, 5H), 7.40-7.31 (m, 2H), 7.14 (td,  $J = 7.2, 1.6$  Hz, 1H), 6.81 (s, 1H).

$^{13}\text{C}$  NMR (101 MHz,  $\text{CDCl}_3$ )  $\delta$  144.35, 137.21, 132.99, 132.49, 130.33, 129.84, 129.36, 129.02, 128.52, 127.16, 125.67, 124.79, 118.76, 116.50, 95.96.

HRMS (APCI):  $m/z$  calcd for  $\text{C}_{17}\text{H}_{11}\text{BrN}_2$   $[\text{M}+\text{H}]^+$  : 323.0178, found: 323.0177.

### 3-bromo-1-(p-tolyl)pyrrolo[1,2-*a*]quinoxaline [3k]

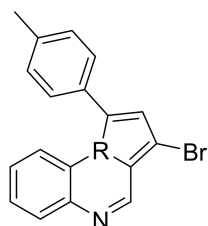

Mp. 118-123 °C. Light yellow solid (55.0 mg, 41%).

$^1\text{H}$  NMR (400 MHz,  $\text{CDCl}_3$ )  $\delta$  8.81 (s, 1H), 7.95 (dd,  $J = 8.0, 1.6$  Hz, 1H), 7.41-7.34 (m, 4H), 7.31 (d,  $J = 8.0$  Hz, 2H), 7.14 (td,  $J = 8.0, 1.6$  Hz, 1H), 6.77 (s, 1H), 2.48 (s, 3H).

$^{13}\text{C}$  NMR (101 MHz,  $\text{CDCl}_3$ )  $\delta$  144.38, 139.40, 137.27, 132.62, 130.30, 130.03, 129.71, 128.63, 127.05, 125.58, 124.70, 118.63, 116.51, 95.82, 21.60.

HRMS (APCI):  $m/z$  calcd for  $\text{C}_{18}\text{H}_{13}\text{BrN}_2$   $[\text{M}+\text{H}]^+$  : 337.0335, found: 337.0333.

### 3-bromo-1-(4-methoxyphenyl)pyrrolo[1,2-*a*]quinoxaline [3l]

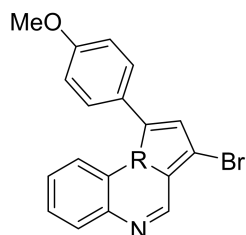

Mp. 148-150 °C. Light yellow solid (65.2 mg, 93%).

$^1\text{H}$  NMR (400 MHz,  $\text{CDCl}_3$ )  $\delta$  8.80 (s, 1H), 7.94 (dd,  $J = 8.0, 1.6$  Hz, 1H), 7.42-7.33 (m, 4H), 7.17-7.11 (m, 1H), 7.03 (d,  $J = 8.4$  Hz, 2H), 6.75 (s, 1H), 3.91 (s, 3H).

$^{13}\text{C}$  NMR (101 MHz,  $\text{CDCl}_3$ )  $\delta$  160.42, 144.34, 137.26, 132.37, 131.17, 130.28, 128.67, 127.06, 125.54, 125.12, 124.58, 118.57, 116.38, 114.42, 95.74, 55.53.

HRMS (APCI):  $m/z$  calcd for  $\text{C}_{18}\text{H}_{13}\text{BrN}_2\text{O}$   $[\text{M}+\text{H}]^+$  : 353.0284, found:

353.0283.

**3-bromo-7-methylpyrrolo[1,2-*a*]quinoxaline [3m]**

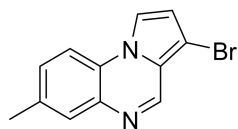

Mp. 174-179 °C. Light yellow solid (51.0 mg, 98%).

<sup>1</sup>H NMR (400 MHz, CDCl<sub>3</sub>) δ 8.72 (s, 1H), 7.74 (dd, *J* = 7.2, 2.4 Hz, 2H), 7.64 (d, *J* = 8.4 Hz, 1H), 7.30 (dd, *J* = 8.4, 2.0 Hz, 1H), 6.83 (d, *J* = 2.8 Hz, 1H), 2.47 (s, 3H).

<sup>13</sup>C NMR (101 MHz, CDCl<sub>3</sub>) δ 143.86, 135.79, 135.71, 130.08, 129.42, 125.16, 123.73, 115.98, 113.89, 113.02, 94.65, 21.20.

HRMS (APCI): *m/z* calcd for C<sub>12</sub>H<sub>9</sub>BrN<sub>2</sub> [M+H]<sup>+</sup> : 261.0022, found: 221.0019.

**3-bromo-7-chloropyrrolo[1,2-*a*]quinoxaline [3n]**

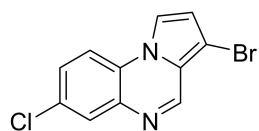

Mp. 167-172 °C. Light yellow solid (33.9 mg, 61%).

<sup>1</sup>H NMR (400 MHz, CDCl<sub>3</sub>) δ 8.78 (s, 1H), 7.96 (d, *J* = 2.4 Hz, 1H), 7.82 (dd, *J* = 2.8, 0.8 Hz, 1H), 7.74 (d, *J* = 8.8 Hz, 1H), 7.49 (dd, *J* = 8.8, 2.4 Hz, 1H), 6.91 (d, *J* = 2.8 Hz, 1H).

<sup>13</sup>C NMR (101 MHz, CDCl<sub>3</sub>) δ 145.02, 136.68, 131.24, 129.73, 128.51, 126.05, 123.82, 116.86, 114.69, 114.61, 96.10.

HRMS (APCI): *m/z* calcd for C<sub>11</sub>H<sub>6</sub>BrClN<sub>2</sub> [M+H]<sup>+</sup> : 280.9476, found: 280.9473.

**3-bromo-4-(4-methoxyphenyl)-7-methylpyrrolo[1,2-*a*]quinoxaline [3o]**

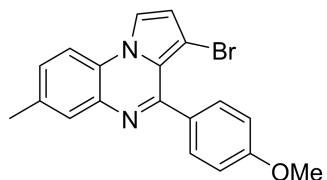

Mp. 162-167 °C. Light yellow solid (47.4 mg, 65%)

<sup>1</sup>H NMR (400 MHz, CDCl<sub>3</sub>) δ 7.89 (d, *J* = 2.8 Hz, 1H), 7.82 (s, 1H), 7.71 (d, *J* = 8.4 Hz, 1H), 7.60 (d, *J* = 2.0 Hz, 1H), 7.58 (d, *J* = 2.0 Hz, 1H), 7.32 (dd, *J* = 8.4, 2.0 Hz, 1H), 7.03 (d, *J* = 2.0 Hz, 1H), 7.02 (d, *J* = 2.0 Hz, 1H), 6.88 (d, *J* = 3.2 Hz, 1H), 3.89 (s, 3H), 2.48 (s, 3H).

$^{13}\text{C}$  NMR (101 MHz,  $\text{CDCl}_3$ )  $\delta$  160.79, 154.48, 135.80, 135.33, 131.16, 129.82, 129.08, 124.79, 121.86, 118.06, 114.60, 113.43, 112.86, 95.66, 55.49, 21.23.

HRMS (APCI):  $m/z$  calcd for  $\text{C}_{19}\text{H}_{15}\text{BrN}_2\text{O}$   $[\text{M}+\text{H}]^+$  : 367.0441, found: 367.0437.

**3-bromo-4-(4-bromophenyl)-7-methylpyrrolo[1,2-*a*]quinoxaline [3p]**

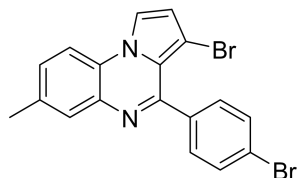

Mp. 216-219 °C. Light yellow solid (39.5 mg, 51%).

$^1\text{H}$  NMR (400 MHz,  $\text{CDCl}_3$ )  $\delta$  7.68 (d,  $J = 3.2$  Hz, 1H), 7.57 (s, 1H), 7.49 (d,  $J = 8.4$  Hz, 1H), 7.39 (dd,  $J = 6.4, 2.0$  Hz, 2H), 7.27 (dd,  $J = 6.4, 2.0$  Hz, 2H), 7.12 (dd,  $J = 8.4, 2.0$  Hz, 1H), 6.65 (d,  $J = 2.8$  Hz, 1H), 2.25 (s, 3H).

$^{13}\text{C}$  NMR (101 MHz,  $\text{CDCl}_3$ )  $\delta$  153.60, 136.40, 135.99, 135.36, 131.23, 130.09, 129.53, 124.90, 123.82, 121.52, 118.09, 114.71, 112.95, 95.41, 21.25.

HRMS (APCI):  $m/z$  calcd for  $\text{C}_{18}\text{H}_{12}\text{Br}_2\text{N}_2$   $[\text{M}+\text{H}]^+$  : 414.9440, found: 414.9436.

**3-bromo-8-methylpyrrolo[1,2-*a*]quinoxaline [3q]**

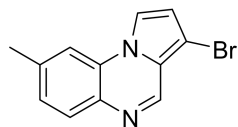

Mp. 169-174 °C. Light yellow solid (51.5 mg, 98%).

$^1\text{H}$  NMR (400 MHz,  $\text{CDCl}_3$ )  $\delta$  8.72 (s, 1H), 7.84 (d,  $J = 8.4$  Hz, 1H), 7.79 (d,  $J = 3.2$  Hz, 1H), 7.58 (d,  $J = 2.0$  Hz, 1H), 7.26 (dd,  $J = 8.0, 2.0$  Hz, 1H), 6.86 (d,  $J = 2.8$  Hz, 1H), 2.53 (s, 3H).

$^{13}\text{C}$  NMR (101 MHz,  $\text{CDCl}_3$ )  $\delta$  143.03, 139.08, 133.78, 130.02, 127.22, 127.13, 123.92, 116.23, 113.86, 113.42, 94.69, 21.96.

HRMS (APCI):  $m/z$  calcd for  $\text{C}_{12}\text{H}_9\text{BrN}_2$   $[\text{M}+\text{H}]^+$  : 261.0022, found: 261.0020.

**3-bromo-8-chloropyrrolo[1,2-*a*]quinoxaline [3r]**

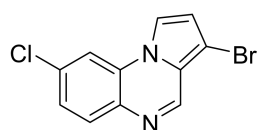

Mp. 169-174 °C. Light yellow solid (28.7 mg, 51%).

$^1\text{H}$  NMR (400 MHz,  $\text{CDCl}_3$ )  $\delta$  8.82 (s, 1H), 8.04 (d,  $J = 8.8$  Hz, 1H), 7.88 (d,  $J$

= 2.8 Hz, 1H), 7.85 (d,  $J = 2.0$  Hz, 1H), 7.47 (dd,  $J = 8.4, 2.0$  Hz, 1H), 7.00 (d,  $J = 2.8$  Hz, 1H).

$^{13}\text{C}$  NMR (101 MHz,  $\text{CDCl}_3$ )  $\delta$  143.51, 134.45, 130.95, 127.97, 127.01, 126.74, 123.73, 117.50, 115.46, 115.36, 113.81.

HRMS (APCI):  $m/z$  calcd for  $\text{C}_{11}\text{H}_6\text{BrClN}_2$   $[\text{M}+\text{H}]^+$  : 280.9476, found: 280.9474.

### 3-bromo-8-fluoropyrrolo[1,2-*a*]quinoxaline [3s]

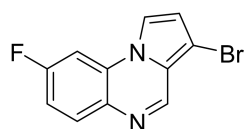

Mp. 164-166 °C. Light yellow solid (43.3 mg, 84%).

$^1\text{H}$  NMR (400 MHz,  $\text{CDCl}_3$ )  $\delta$  8.78 (s, 1H), 8.02 (dd,  $J = 8.8, 5.6$  Hz, 1H), 7.78 (d,  $J = 3.2$  Hz, 1H), 7.51 (dd,  $J = 8.8, 2.4$  Hz, 1H), 7.22 (td,  $J = 9.2, 2.8$  Hz, 1H), 6.95 (d,  $J = 2.8$  Hz, 1H).

$^{13}\text{C}$  NMR (151 MHz,  $\text{CDCl}_3$ )  $\delta$  161.94 (d,  $J = 250.1$  Hz), 143.25, 132.33 (d,  $J = 9.6$  Hz), 116.98, 114.50, 114.10, 100.55, 100.37.

$^{19}\text{F}$  NMR (565 MHz,  $\text{CDCl}_3$ )  $\delta$  -109.16.

HRMS (APCI):  $m/z$  calcd for  $\text{C}_{11}\text{H}_6\text{BrFN}_2$   $[\text{M}+\text{H}]^+$  : 264.9771, found: 264.9769.

### 1-bromo-3-phenylpyrrolo[1,2-*a*]quinoxaline [3t]

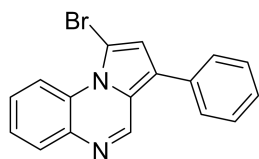

Mp. 137-141°C. Light yellow solid (58.2 mg, 90%).

$^1\text{H}$  NMR (400 MHz,  $\text{CDCl}_3$ )  $\delta$  9.27 (dd,  $J = 8.0, 2.0$  Hz, 1H), 8.90 (s, 1H), 7.98 (dd,  $J = 7.2, 2.4$  Hz, 1H), 7.57 (d,  $J = 7.2$  Hz, 2H), 7.53-7.46 (m, 4H), 7.40 (t,  $J = 7.2$  Hz, 1H), 7.03 (s, 1H).

$^{13}\text{C}$  NMR (101 MHz,  $\text{CDCl}_3$ )  $\delta$  144.08, 137.05, 133.00, 129.85, 129.23, 128.72, 127.86, 127.09, 126.11, 124.81, 124.70, 119.02, 115.61, 100.11.

HRMS (APCI):  $m/z$  calcd for  $\text{C}_{17}\text{H}_{11}\text{BrN}_2$   $[\text{M}+\text{H}]^+$  : 323.0178, found: 323.0177.

### 1-bromo-3-(*p*-tolyl)pyrrolo[1,2-*a*]quinoxaline [3u]

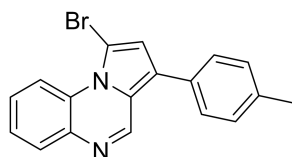

Mp. 150-155 °C. Light yellow solid (59.4 mg, 88%).

$^1\text{H}$  NMR (400 MHz,  $\text{CDCl}_3$ )  $\delta$  9.26 (dd,  $J = 8.0, 2.0$  Hz, 1H), 8.88 (s, 1H), 7.98 (dd,  $J = 7.2, 2.0$  Hz, 1H), 7.54-7.45 (m, 4H), 7.30 (d,  $J = 7.6$  Hz, 2H), 7.01 (s, 1H), 2.43 (s, 3H).

$^{13}\text{C}$  NMR (101 MHz,  $\text{CDCl}_3$ )  $\delta$  144.28, 137.76, 137.20, 130.10, 129.94, 129.90, 129.35, 128.58, 126.99, 126.03, 124.76, 124.67, 118.89, 115.59, 99.91, 21.37.

HRMS (APCI):  $m/z$  calcd for  $\text{C}_{18}\text{H}_{13}\text{BrN}_2$   $[\text{M}+\text{H}]^+$  : 337.0335, found: 337.0333.

#### 4-(1-bromopyrrolo[1,2-*a*]quinoxalin-3-yl)benzotrile [3v]

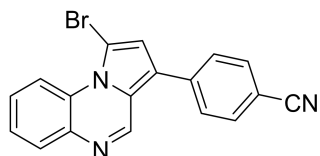

Mp. 240-242 °C. Light yellow solid (43.9mg, 63%).

$^1\text{H}$  NMR (400 MHz,  $\text{CDCl}_3$ )  $\delta$  9.32 (dd,  $J = 8.0, 2.0$  Hz, 1H), 8.90 (s, 1H), 8.04 (dd,  $J = 7.2, 2.0$  Hz, 1H), 7.79 (d,  $J = 8.4$  Hz, 2H), 7.68 (d,  $J = 8.4$  Hz, 2H), 7.57 (pd,  $J = 7.2, 2.0$  Hz, 2H), 7.08 (s, 1H).

$^{13}\text{C}$  NMR (101 MHz,  $\text{CDCl}_3$ )  $\delta$  143.08, 137.69, 133.06, 129.98, 129.10, 127.72, 126.66, 119.12, 118.81, 115.77, 111.40, 101.17.

HRMS (APCI):  $m/z$  calcd for  $\text{C}_{18}\text{H}_{10}\text{BrN}_3$   $[\text{M}+\text{H}]^+$  : 348.0131, found: 348.0129.

#### 1,3-dibromopyrrolo[1,2-*a*]quinoxaline [4a]

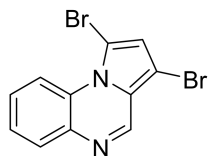

Mp. 157-162 °C. White solid (52.1 mg, 80%).

$^1\text{H}$  NMR (400 MHz,  $\text{CDCl}_3$ )  $\delta$  9.18-9.23 (m, 1H), 8.71 (s, 1H), 8.03-7.96 (m, 1H), 7.51-7.53 (m, 2H), 6.91 (s, 1H).

$^{13}\text{C}$  NMR (101 MHz,  $\text{CDCl}_3$ )  $\delta$  143.32, 137.00, 130.40, 128.87, 127.42, 126.53, 125.97, 120.90, 115.34, 99.42, 96.23.

HRMS (APCI):  $m/z$  calcd for  $\text{C}_{11}\text{H}_6\text{Br}_2\text{N}_2$   $[\text{M}+\text{H}]^+$  : 324.8971, found: 324.8968.



### 1,3-dibromo-4-phenylpyrrolo[1,2-*a*]quinoxaline [4b]

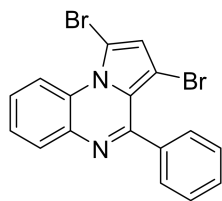

Mp. 151-153 °C. White solid (49.5 mg, 62%).

$^1\text{H}$  NMR (400 MHz,  $\text{CDCl}_3$ )  $\delta$  9.21-9.13 (m, 1H), 7.96-7.90 (m, 1H), 7.51-7.45 (m, 2H), 7.44-7.38 (m, 5H), 6.84 (s, 1H).

$^{13}\text{C}$  NMR (101 MHz,  $\text{CDCl}_3$ )  $\delta$  154.29, 137.32, 136.77, 130.41, 129.43, 129.41, 128.43, 128.18, 126.94, 126.42, 124.38, 123.03, 115.29, 99.87, 96.74.

HRMS (APCI):  $m/z$  calcd for  $\text{C}_{17}\text{H}_{10}\text{Br}_2\text{N}_2$   $[\text{M}+\text{H}]^+$  : 400.9284, found: 400.9280.

### 1,3-dibromo-4-(*p*-tolyl)pyrrolo[1,2-*a*]quinoxaline [4c]

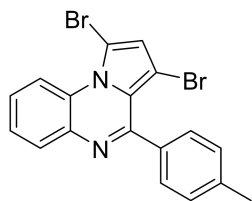

Mp. 159-162 °C. Light yellow solid (46.5 mg, 56%).

$^1\text{H}$  NMR (400 MHz,  $\text{CDCl}_3$ )  $\delta$  9.29-9.21 (m, 1H), 8.05-7.99 (m, 1H), 7.53-7.47 (m, 3H), 7.46 (s, 1H), 7.31 (s, 1H), 7.29 (s, 1H), 6.93 (s, 1H), 2.45 (s, 3H).

$^{13}\text{C}$  NMR (101 MHz,  $\text{CDCl}_3$ )  $\delta$  155.01, 139.42, 135.52, 134.50, 130.24, 129.48, 128.72, 127.98, 126.97, 125.86, 121.94, 118.25, 114.69, 113.13, 95.88, 21.66.

HRMS (APCI):  $m/z$  calcd for  $\text{C}_{18}\text{H}_{12}\text{Br}_2\text{N}_2$   $[\text{M}+\text{H}]^+$  : 414.9440, found: 414.9435.

### 1,3-dibromo-4-(4-methoxyphenyl)pyrrolo[1,2-*a*]quinoxaline [4d]

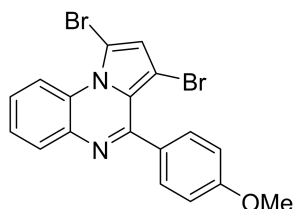

Mp. 159-162 °C. White solid (43.2 mg, 50%)

$^1\text{H}$  NMR (400 MHz,  $\text{CDCl}_3$ )  $\delta$  9.22-9.15 (m, 1H), 7.95-7.97 (m, 1H), 7.46 (d,  $J$  = 2.0 Hz, 1H), 7.45-7.40 (m, 3H), 6.95 (d,  $J$  = 2.0 Hz, 1H), 6.93 (d,  $J$  = 2.0 Hz, 1H), 6.87 (s, 1H), 3.81 (s, 3H).

$^{13}\text{C}$  NMR (101 MHz,  $\text{CDCl}_3$ )  $\delta$  160.89, 154.01, 136.68, 131.05, 130.17, 128.33, 126.82, 126.45, 124.54, 123.14, 115.31, 113.60, 100.01, 97.18, 55.52.

HRMS (APCI):  $m/z$  calcd for  $\text{C}_{18}\text{H}_{12}\text{Br}_2\text{N}_2\text{O}$   $[\text{M}+\text{H}]^+$  : 430.9389, found: 430.9385.

### 1,3-dibromo-4-(4-chlorophenyl)pyrrolo[1,2-*a*]quinoxaline [4e]

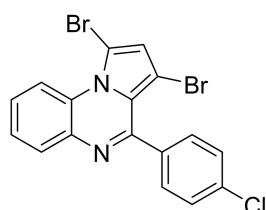

Mp. 189-193 °C. White solid (45.2 mg, 53%).

$^1\text{H}$  NMR (400 MHz,  $\text{CDCl}_3$ )  $\delta$  9.31-9.22 (m, 1H), 8.04-7.97 (m, 1H), 7.51-7.55 (m, 4H), 7.46-7.49 (m, 2H), 6.94 (s, 1H).

$^{13}\text{C}$  NMR (101 MHz,  $\text{CDCl}_3$ )  $\delta$  153.07, 136.59, 135.71, 130.96, 130.36, 128.45, 128.43, 127.22, 126.58, 124.16, 123.15, 115.36, 100.26, 96.80.

HRMS (APCI):  $m/z$  calcd for  $\text{C}_{17}\text{H}_9\text{Br}_2\text{ClN}_2$   $[\text{M}+\text{H}]^+$  : 434.8894, found: 434.8890.

### 1,3-dibromo-4-(4-bromophenyl)pyrrolo[1,2-*a*]quinoxaline [4f]

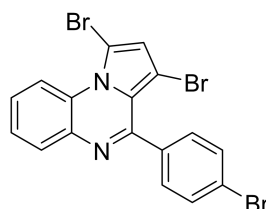

Mp. 207-211°C. White solid (49.5 mg, 53%).

$^1\text{H}$  NMR (400 MHz,  $\text{CDCl}_3$ )  $\delta$  9.32-9.23 (m, 1H), 8.06-7.96 (m, 1H), 7.63 (d,  $J$  = 8.0 Hz, 2H), 7.58-7.49 (m, 2H), 7.46 (d,  $J$  = 8.0 Hz, 2H), 6.95 (s, 1H).

$^{13}\text{C}$  NMR (101 MHz,  $\text{CDCl}_3$ )  $\delta$  153.06, 136.53, 136.06, 131.39, 131.21, 130.33, 128.41, 127.25, 126.60, 124.08, 124.00, 123.17, 115.37, 100.33, 96.87.

HRMS (APCI):  $m/z$  calcd for  $\text{C}_{17}\text{H}_9\text{Br}_3\text{N}_2$   $[\text{M}+\text{H}]^+$  : 478.8389, found: 478.8386.

### 1,3-dibromo-4-(4-fluorophenyl)pyrrolo[1,2-*a*]quinoxaline [4g]

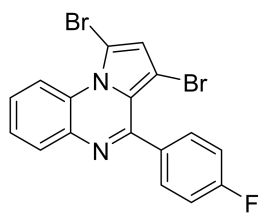

Mp. 168-169 °C. White solid (45.7 mg, 55%).

$^1\text{H}$  NMR (400 MHz,  $\text{CDCl}_3$ )  $\delta$  9.31-9.23 (m, 1H), 8.06-8.00 (m, 1H), 7.60-7.48 (m, 4H), 7.19 (t,  $J = 8.8$  Hz, 2H), 6.95 (s, 1H).

$^{13}\text{C}$  NMR (101 MHz,  $\text{CDCl}_3$ )  $\delta$  165.04, 162.57, 153.24, 131.56, 131.47, 130.29, 128.44, 127.18, 126.59, 124.30, 123.20, 115.41, 115.37, 115.19, 100.40, 97.24.

$^{19}\text{F}$  NMR (376 MHz,  $\text{CDCl}_3$ )  $\delta$  -111.77 (s).

HRMS (APCI):  $m/z$  calcd for  $\text{C}_{17}\text{H}_9\text{Br}_2\text{FN}_2$   $[\text{M}+\text{H}]^+$  : 418.9189, found: 418.9185.

### 1,3-dibromo-4-(4-nitrophenyl)pyrrolo[1,2-a]quinoxaline [4h]

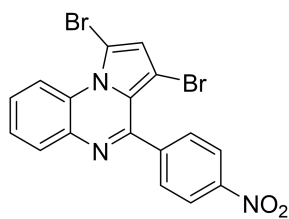

Mp. 159-162 °C. Yellow solid (54.5 mg, 61%)

$^1\text{H}$  NMR (400 MHz,  $\text{CDCl}_3$ )  $\delta$  9.31 (dd,  $J = 8.0, 2.0$  Hz, 1H), 8.37 (d,  $J = 8.4$  Hz, 2H), 8.03 (dd,  $J = 7.6, 2.0$  Hz, 1H), 7.77 (d,  $J = 8.0$  Hz, 2H), 7.57 (pd,  $J = 7.2, 1.6$  Hz, 2H), 6.99 (s, 1H).

$^{13}\text{C}$  NMR (151 MHz,  $\text{CDCl}_3$ )  $\delta$  151.92, 148.68, 143.48, 136.44, 130.81, 130.54, 128.54, 127.81, 126.85, 123.78, 123.46, 123.30, 115.51, 100.83, 96.72.

HRMS (APCI):  $m/z$  calcd for  $\text{C}_{17}\text{H}_9\text{Br}_2\text{N}_3\text{O}_2$   $[\text{M}+\text{H}]^+$  : 445.9134, found: 445.9131.

### 1,3-dibromo-4-(2,4-dichlorophenyl)pyrrolo[1,2-a]quinoxaline [4i]

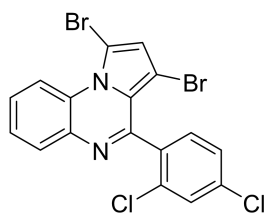

Mp. 145-150 °C. Light yellow solid (71.1 mg, 78%).

$^1\text{H}$  NMR (400 MHz,  $\text{CDCl}_3$ )  $\delta$  9.27 (dd,  $J = 8.0, 1.6$  Hz, 1H), 8.01 (dd,  $J = 7.6, 2.0$  Hz, 1H), 7.56-7.50 (m, 3H), 7.41 (dd,  $J = 8.0, 1.6$  Hz, 1H), 7.38 (d,  $J = 8.4$

Hz, 1H), 6.92 (s, 1H).

$^{13}\text{C}$  NMR (151 MHz,  $\text{CDCl}_3$ )  $\delta$  150.72, 136.48, 136.00, 134.96, 131.62, 130.53, 130.17, 129.42, 128.76, 127.56, 127.38, 126.58, 124.15, 122.79, 115.36, 100.16, 96.64.

HRMS (APCI):  $m/z$  calcd for  $\text{C}_{17}\text{H}_8\text{Br}_2\text{Cl}_2\text{N}_2$   $[\text{M}+\text{H}]^+$  : 468.8504, found: 468.8500.

### 1,3-dibromo-7-methylpyrrolo[1,2-*a*]quinoxaline [4j]

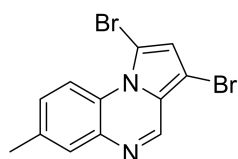

Mp. 149-151 °C. Light yellow solid (59.1 mg, 87%).

$^1\text{H}$  NMR (400 MHz,  $\text{CDCl}_3$ )  $\delta$  8.99 (d,  $J = 8.8$  Hz, 1H), 8.63 (s, 1H), 7.74-7.70 (m, 1H), 7.28 (dd,  $J = 8.8, 2.0$  Hz, 1H), 6.84 (s, 1H), 2.47 (s, 3H).

$^{13}\text{C}$  NMR (101 MHz,  $\text{CDCl}_3$ )  $\delta$  143.18, 136.95, 136.42, 130.14, 128.38, 126.58, 125.79, 120.43, 114.94, 98.99, 95.75, 77.48, 77.16, 76.84, 21.06.

HRMS (APCI):  $m/z$  calcd for  $\text{C}_{12}\text{H}_8\text{Br}_2\text{N}_2$   $[\text{M}+\text{H}]^+$  : 338.9127, found: 338.9124.

### 1,3-dibromo-7-chloropyrrolo[1,2-*a*]quinoxaline [4k]

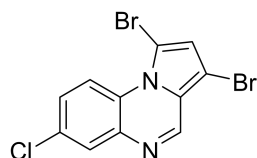

Mp. 187-190 °C. Light yellow solid (36.3 mg, 51%).

$^1\text{H}$  NMR (600 MHz,  $\text{CDCl}_3$ )  $\delta$  9.22 (d,  $J = 2.2$  Hz, 1H), 9.22 (d,  $J = 2.4$  Hz, 1H), 8.69 (s, 1H), 7.92 (d,  $J = 8.4$  Hz, 1H), 7.47 (dd,  $J = 9.0, 2.4$  Hz, 1H), 6.95 (s, 1H).

$^{13}\text{C}$  NMR (151 MHz,  $\text{CDCl}_3$ )  $\delta$  143.53, 135.79, 132.81, 131.48, 129.24, 126.93, 125.93, 121.33, 115.42, 99.76, 96.69.

HRMS (APCI):  $m/z$  calcd for  $\text{C}_{11}\text{H}_5\text{Br}_2\text{ClN}_2$   $[\text{M}+\text{H}]^+$  : 358.8581, found: 358.8587.

### 1,3-dibromo-8-methylpyrrolo[1,2-*a*]quinoxaline [4l]

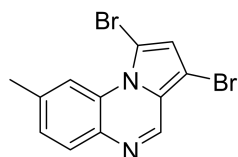

Mp. 166-171 °C. Light yellow solid (48.1 mg, 71%).

$^1\text{H}$  NMR (400 MHz,  $\text{CDCl}_3$ )  $\delta$  8.64 (s, 1H), 8.64 (s, 1H), 7.86 (d,  $J = 8.4$  Hz, 1H), 7.31 (dd,  $J = 8.4, 1.6$  Hz, 1H), 6.88 (s, 1H), 2.53 (s, 3H).

$^{13}\text{C}$  NMR (101 MHz,  $\text{CDCl}_3$ )  $\delta$  142.25, 138.01, 134.75, 129.90, 128.62, 127.71, 125.97, 120.85, 115.33, 99.09, 95.95, 22.28.

HRMS (APCI):  $m/z$  calcd for  $\text{C}_{12}\text{H}_8\text{Br}_2\text{N}_2$   $[\text{M}+\text{H}]^+$  : 338.9127, found: 338.9125.

### 1,3-dibromo-8-chloropyrrolo[1,2-*a*]quinoxaline [4m]

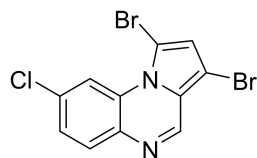

Mp. 197-199 °C. Light yellow solid (62.0 mg, 86%).

$^1\text{H}$  NMR (600 MHz,  $\text{CDCl}_3$ )  $\delta$  9.15 (d,  $J = 9.0$  Hz, 1H), 8.72 (s, 1H), 7.99 (d,  $J = 2.4$  Hz, 1H), 7.49 (dd,  $J = 9.6, 2.4$  Hz, 1H), 6.95 (s, 1H).

$^{13}\text{C}$  NMR (151 MHz,  $\text{CDCl}_3$ )  $\delta$  144.50, 138.36, 131.79, 129.79, 127.43, 127.31, 125.91, 121.12, 116.41, 99.77, 96.78.

HRMS (APCI):  $m/z$  calcd for  $\text{C}_{11}\text{H}_5\text{Br}_2\text{ClN}_2$   $[\text{M}+\text{H}]^+$  : 358.8581, found: 358.8586.

### 1,3-dibromo-8-fluoropyrrolo[1,2-*a*]quinoxaline [4n]

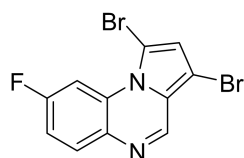

Mp. 184-186 °C. Light yellow solid (55.1 mg, 81%).

$^1\text{H}$  NMR (400 MHz,  $\text{CDCl}_3$ )  $\delta$  8.93 (dd,  $J = 10.8, 2.4$  Hz, 1H), 8.66 (s, 1H), 7.97 (dd,  $J = 8.8, 6.0$  Hz, 1H), 7.27-7.21 (m, 1H), 6.93 (s, 1H).

$^{13}\text{C}$  NMR (151 MHz,  $\text{CDCl}_3$ )  $\delta$  160.53 (d,  $J = 248.6$  Hz), 142.47, 133.51, 131.86 (d,  $J = 9.8$  Hz), 125.59, 121.30, 114.48, 114.33, 102.57 (d,  $J = 29.8$  Hz), 99.59, 96.57.

HRMS (APCI):  $m/z$  calcd for  $\text{C}_{11}\text{H}_5\text{Br}_2\text{FN}_2$   $[\text{M}+\text{H}]^+$  : 342.8876, found: 342.8872.

### 1,3-dibromo-4-(4-methoxyphenyl)-7-methylpyrrolo[1,2-*a*]quinoxaline [4o]

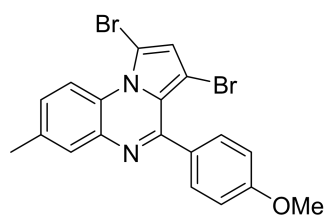

Mp. 166-168 °C. Light yellow solid (39.1mg, 42%).

$^1\text{H}$  NMR (400 MHz,  $\text{CDCl}_3$ )  $\delta$  7.89 (d,  $J = 2.8$  Hz, 1H), 7.82 (s, 1H), 7.71 (d,  $J = 8.4$  Hz, 1H), 7.60 (d,  $J = 2.0$  Hz, 1H), 7.58 (d,  $J = 2.0$  Hz, 1H), 7.32 (dd,  $J = 8.4, 2.0$  Hz, 1H), 7.03 (d,  $J = 2.0$  Hz, 1H), 7.02 (d,  $J = 1.8$  Hz, 1H), 6.88 (d,  $J = 3.2$  Hz, 1H), 3.89 (s, 3H), 2.48 (s, 3H).

$^{13}\text{C}$  NMR (101 MHz,  $\text{CDCl}_3$ )  $\delta$  160.79, 153.92, 136.67, 136.36, 131.02, 129.97, 127.88, 126.15, 124.40, 122.73, 115.00, 113.54, 99.66, 96.52, 55.50, 21.05.

HRMS (APCI):  $m/z$  calcd for  $\text{C}_{19}\text{H}_{14}\text{Br}_2\text{N}_2\text{O}$   $[\text{M}+\text{H}]^+$  : 444.9546, found: 444.9542.

### 1,3-dibromo-4-(4-bromophenyl)-7-methylpyrrolo[1,2-*a*]quinoxaline [4q]

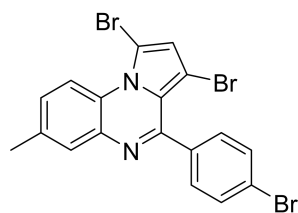

Mp. 124-129 °C. Light yellow solid (73.7mg, 75%).

$^1\text{H}$  NMR (400 MHz,  $\text{CDCl}_3$ )  $\delta$  9.14 (d,  $J = 8.8$  Hz, 1H), 7.83 (s, 1H), 7.64 (d,  $J = 2.0$  Hz, 1H), 7.62 (d,  $J = 2.0$  Hz, 1H), 7.46 (d,  $J = 2.0$  Hz, 1H), 7.44 (d,  $J = 2.0$  Hz, 1H), 7.35 (dd,  $J = 8.8, 1.6$  Hz, 1H), 6.93 (s, 1H), 2.49 (s, 3H).

$^{13}\text{C}$  NMR (151 MHz,  $\text{CDCl}_3$ )  $\delta$  153.04, 136.59, 136.33, 131.36, 131.22, 130.21, 128.35, 126.29, 124.01, 123.89, 122.80, 115.11, 99.98, 96.44, 21.06.

HRMS (APCI):  $m/z$  calcd for  $\text{C}_{18}\text{H}_{11}\text{Br}_3\text{N}_2$   $[\text{M}+\text{H}]^+$  : 492.8545, found: 492.8542.

### 3-phenylpyrrolo[1,2-*a*]quinoxaline [3aa]

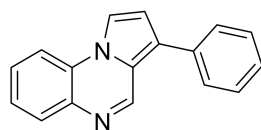

Mp. 178-180 °C. Light yellow solid (42.7 mg, 88%).

$^1\text{H}$  NMR (400 MHz,  $\text{CDCl}_3$ )  $\delta$  9.04 (s, 1H), 7.97 (dd,  $J = 8.0, 1.6$  Hz, 1H), 7.93 (d,  $J = 2.8$  Hz, 1H), 7.84 (dd,  $J = 8.0, 1.2$  Hz, 1H), 7.65 (d,  $J = 7.2$  Hz, 2H),

7.55-7.42 (m, 4H), 7.37 (t,  $J = 7.2$  Hz, 1H), 7.02 (d,  $J = 2.8$  Hz, 1H).

$^{13}\text{C}$  NMR (101 MHz,  $\text{CDCl}_3$ )  $\delta$  145.16, 136.15, 134.49, 130.08, 129.15, 128.36, 128.08, 128.03, 127.19, 125.49, 123.88, 122.75, 114.28, 113.84, 113.80.

HRMS (APCI):  $m/z$  calcd for  $\text{C}_{17}\text{H}_{12}\text{N}_2$   $[\text{M}+\text{H}]^+$  : 245.1073, found: 245.1071.

### 3-bromo-1-(p-tolyl)pyrrolo[1,2-*a*]quinoxaline [3ab]

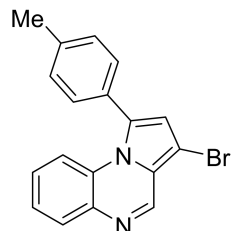

Mp. 118-123 °C. Light yellow solid (56.9 mg, 85%).

$^1\text{H}$  NMR (400 MHz,  $\text{CDCl}_3$ )  $\delta$  8.82 (s, 1H), 7.98 (d,  $J = 8.4$  Hz, 1H), 7.35-7.41 (m, 4H), 7.32 (d,  $J = 8.0$  Hz, 2H), 7.18-7.13 (m, 1H), 6.79 (s, 1H), 2.49 (s, 3H).

$^{13}\text{C}$  NMR (101 MHz,  $\text{CDCl}_3$ )  $\delta$  144.00, 139.55, 136.70, 133.10, 129.95, 129.88, 129.76, 129.69, 128.59, 127.22, 125.74, 124.65, 118.93, 116.57, 96.56, 21.61.

HRMS (APCI):  $m/z$  calcd for  $\text{C}_{18}\text{H}_{13}\text{BrN}_2$   $[\text{M}+\text{H}]^+$  : 337.0335, found: 337.0331.

### 3-bromo-1-chloropyrrolo[1,2-*a*]quinoxaline [3ac]

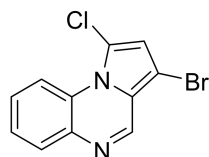

Mp 136-138 °C. Light yellow solid (53.9 mg, 96%).

$^1\text{H}$  NMR (400 MHz,  $\text{CDCl}_3$ )  $\delta$  8.93 (dd,  $J = 6.4, 3.6$  Hz, 1H), 8.68 (s, 1H), 7.95 (dd,  $J = 6.4, 3.2$  Hz, 1H), 7.48 (dd,  $J = 6.4, 3.2$  Hz, 2H), 6.78 (s, 1H).

$^{13}\text{C}$  NMR (101 MHz,  $\text{CDCl}_3$ )  $\delta$  143.51, 137.12, 130.42, 128.48, 127.57, 126.41, 124.31, 116.69, 115.76, 115.67, 95.02.

HRMS (APCI):  $m/z$  calcd for  $\text{C}_{11}\text{H}_6\text{BrClN}_2$   $[\text{M}+\text{H}]^+$  : 280.9476, found: 280.9473.

## 4. Copies of Spectra

### 3-bromopyrrolo[1,2-*a*]quinoxaline [3a]

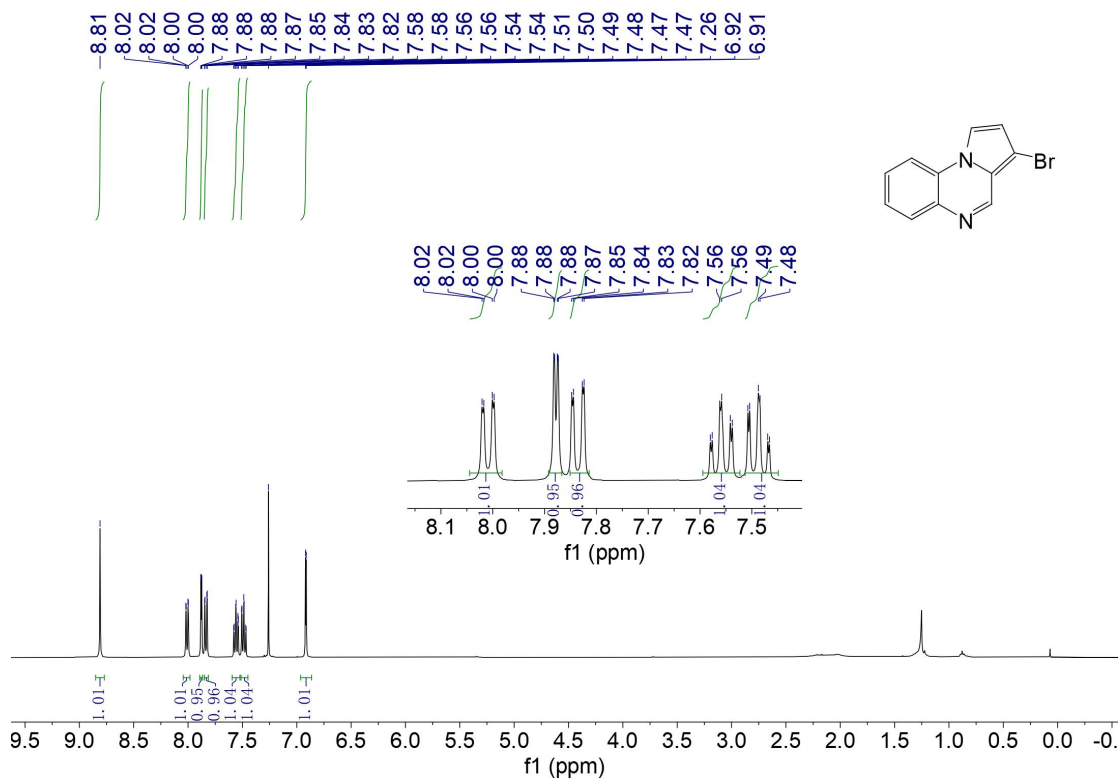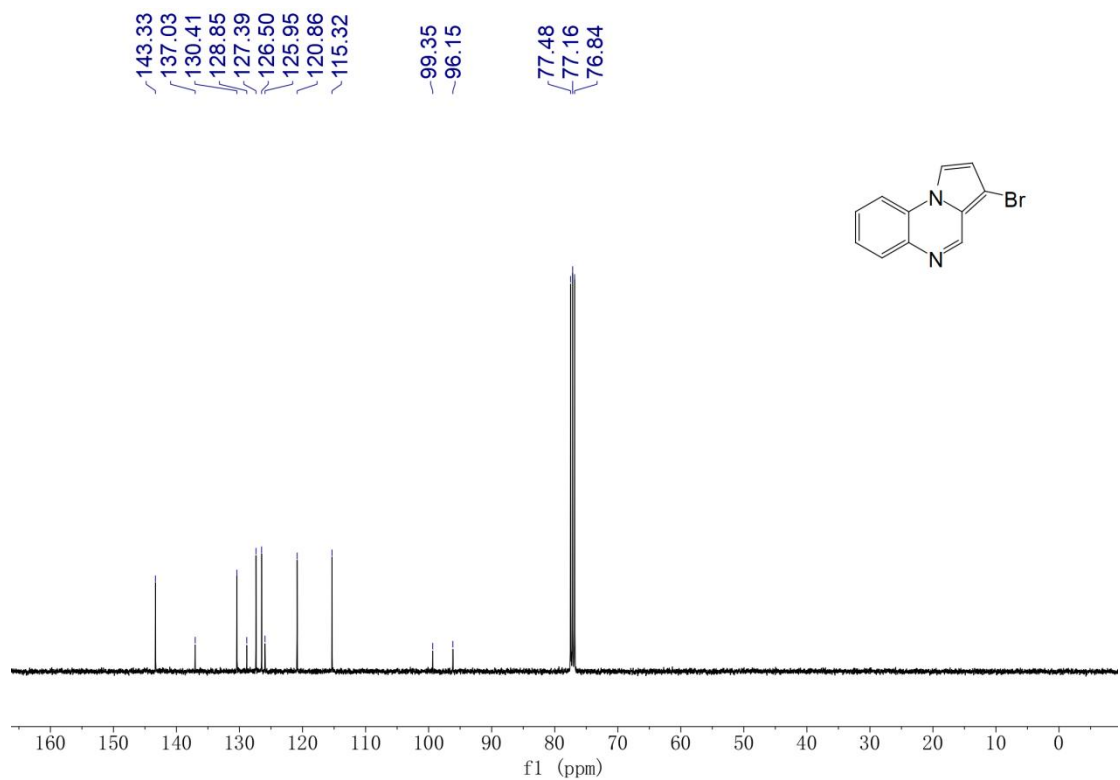



### 3-bromo-4-phenylpyrrolo[1,2-a]quinoxaline [3b]

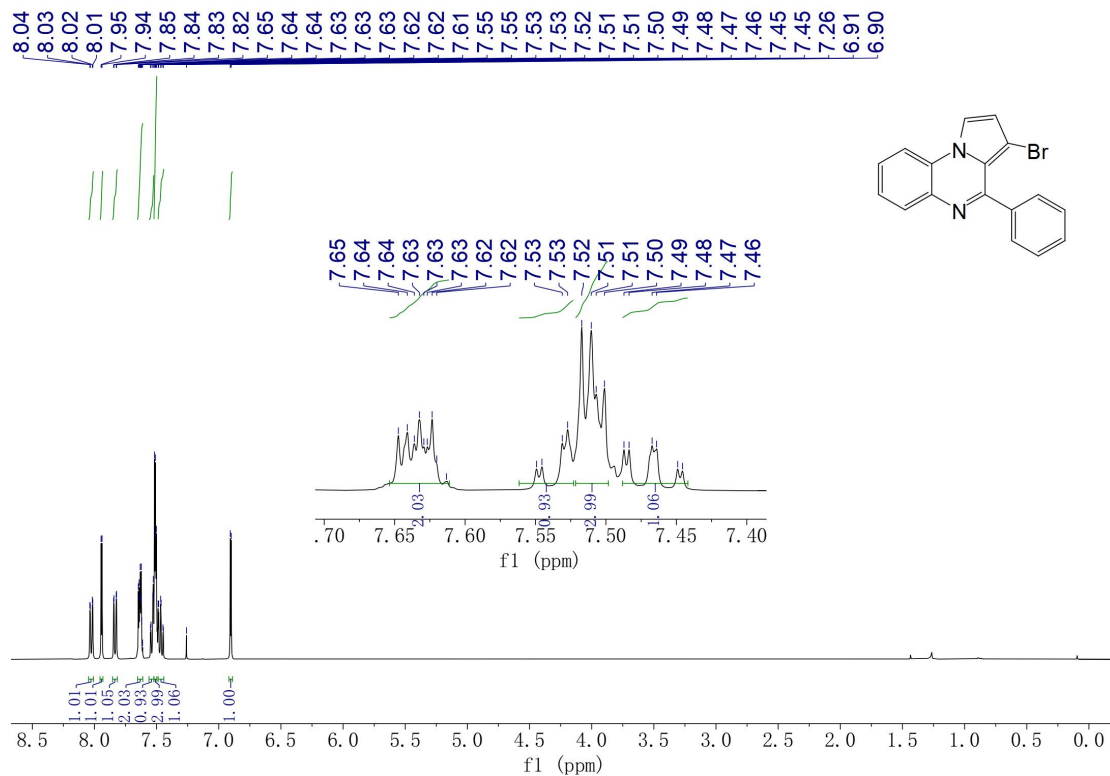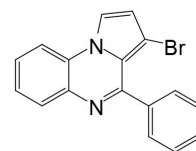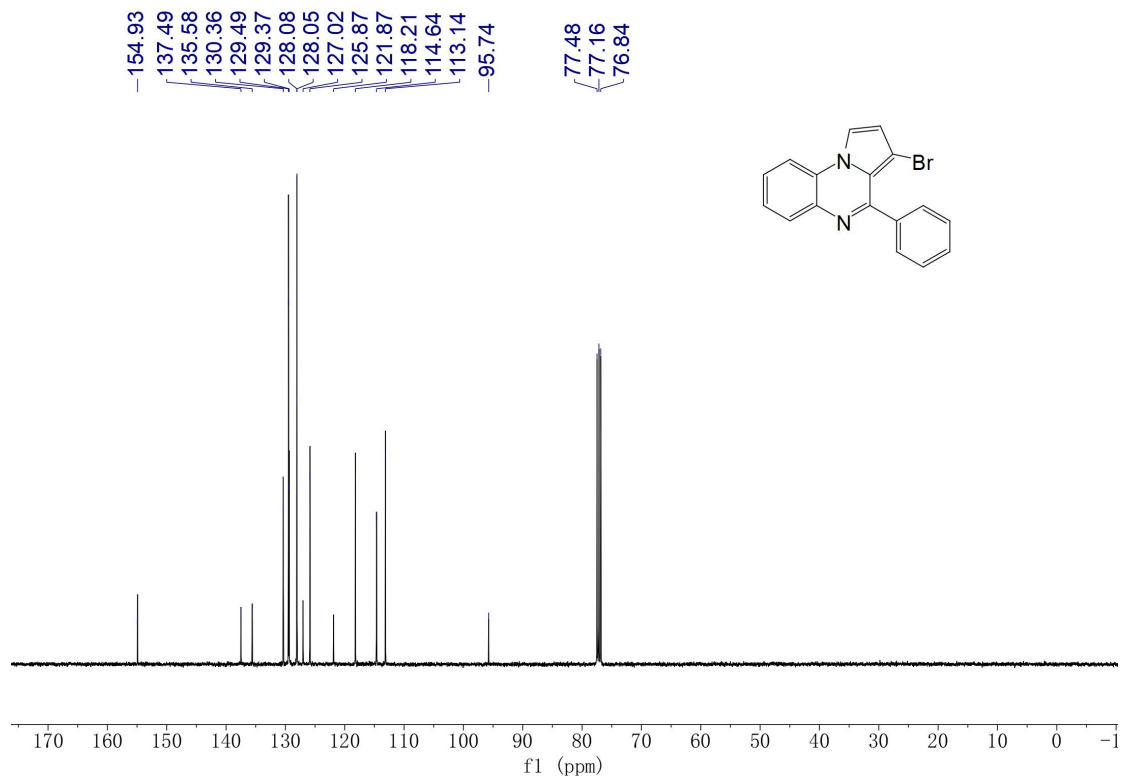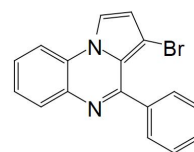

### 3-bromo-4-(p-tolyl)pyrrolo[1,2-a]quinoxaline [3c]

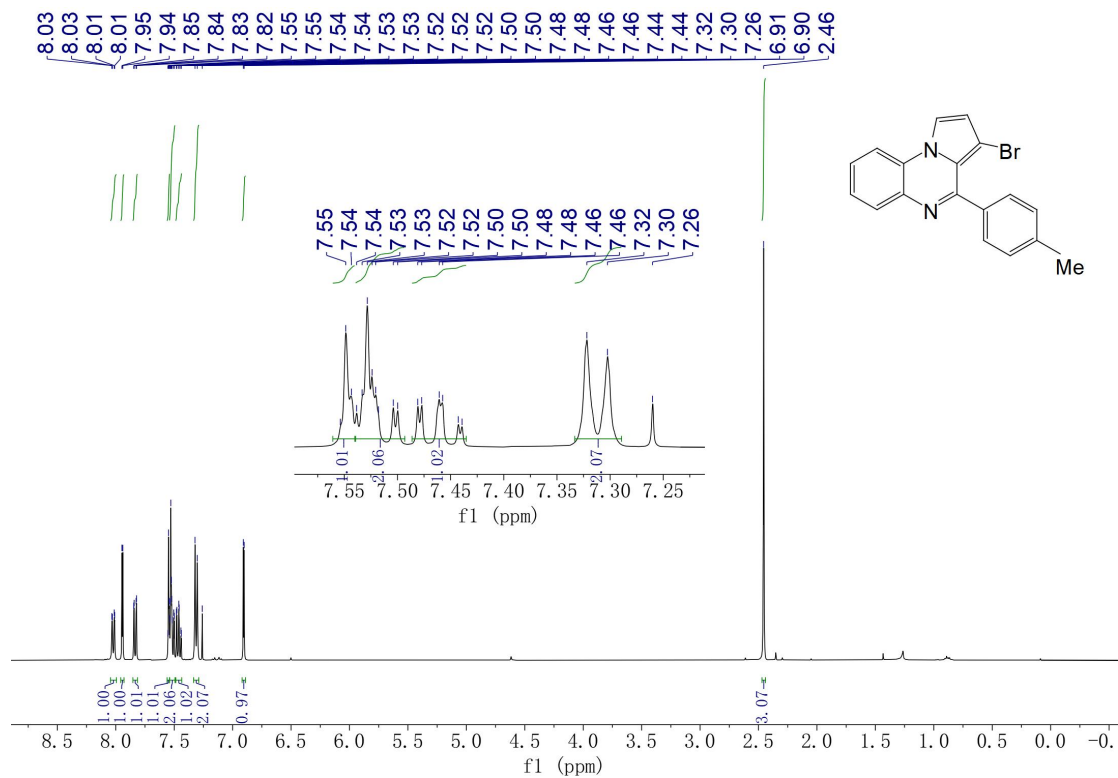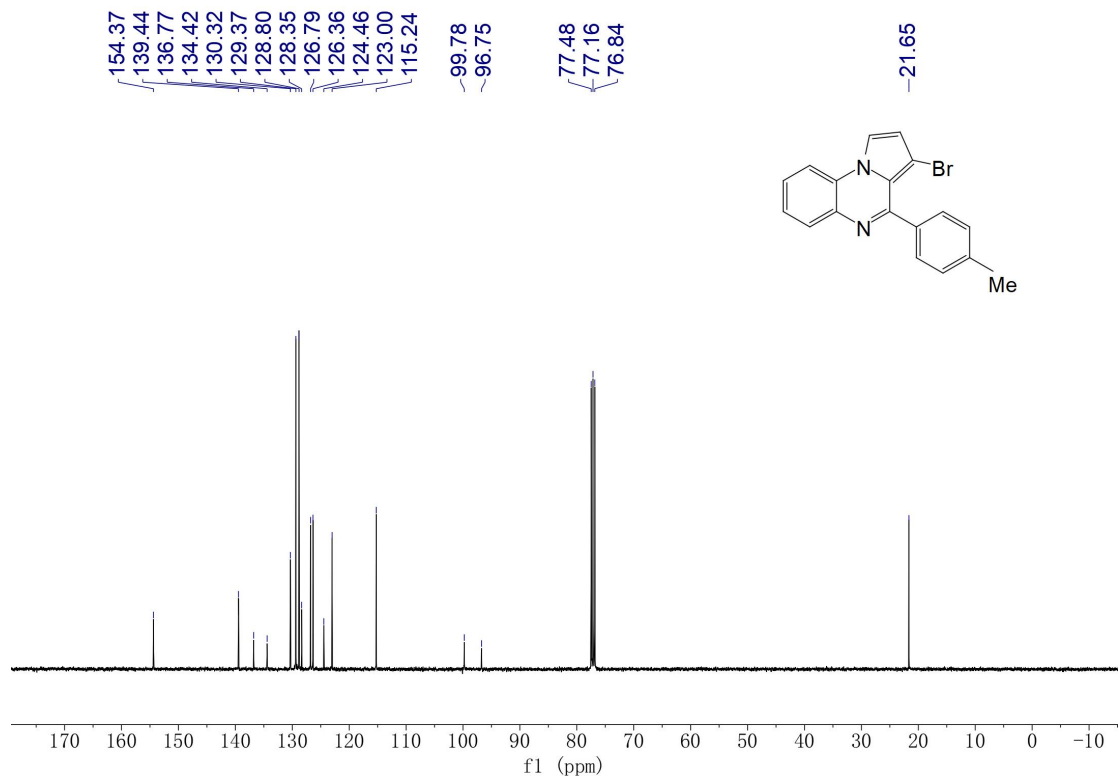

**3-bromo-4-(4-methoxyphenyl)pyrrolo[1,2-a]quinoxaline [3d]**

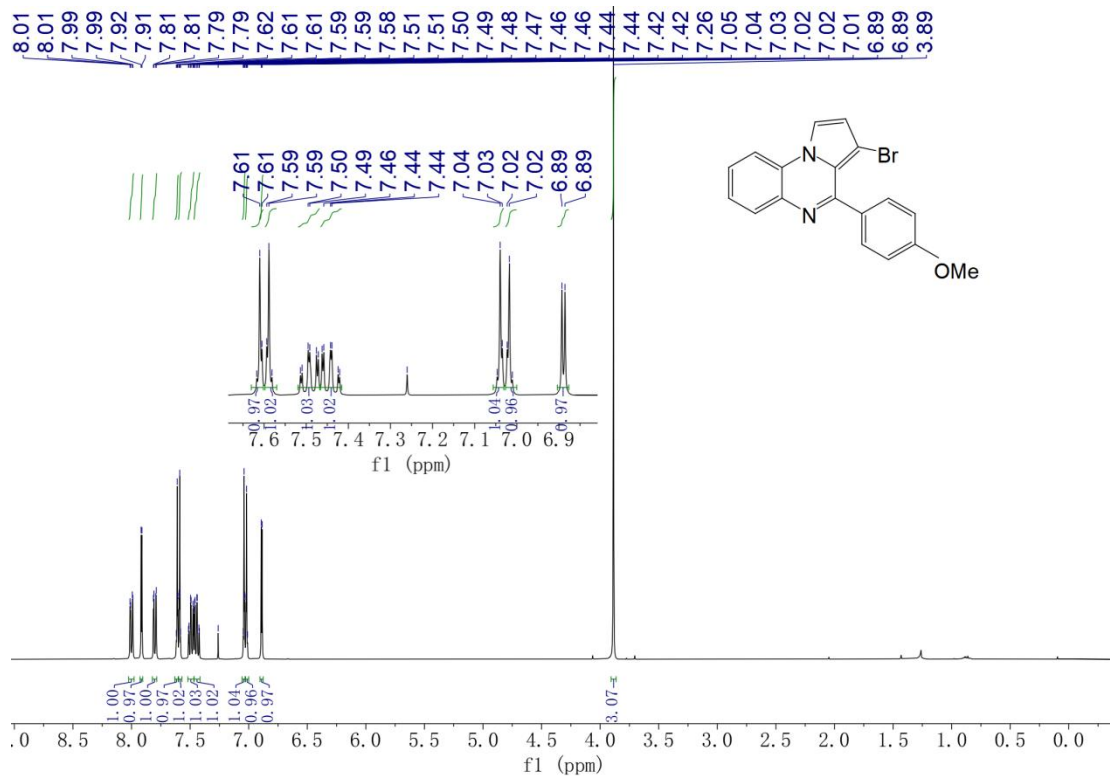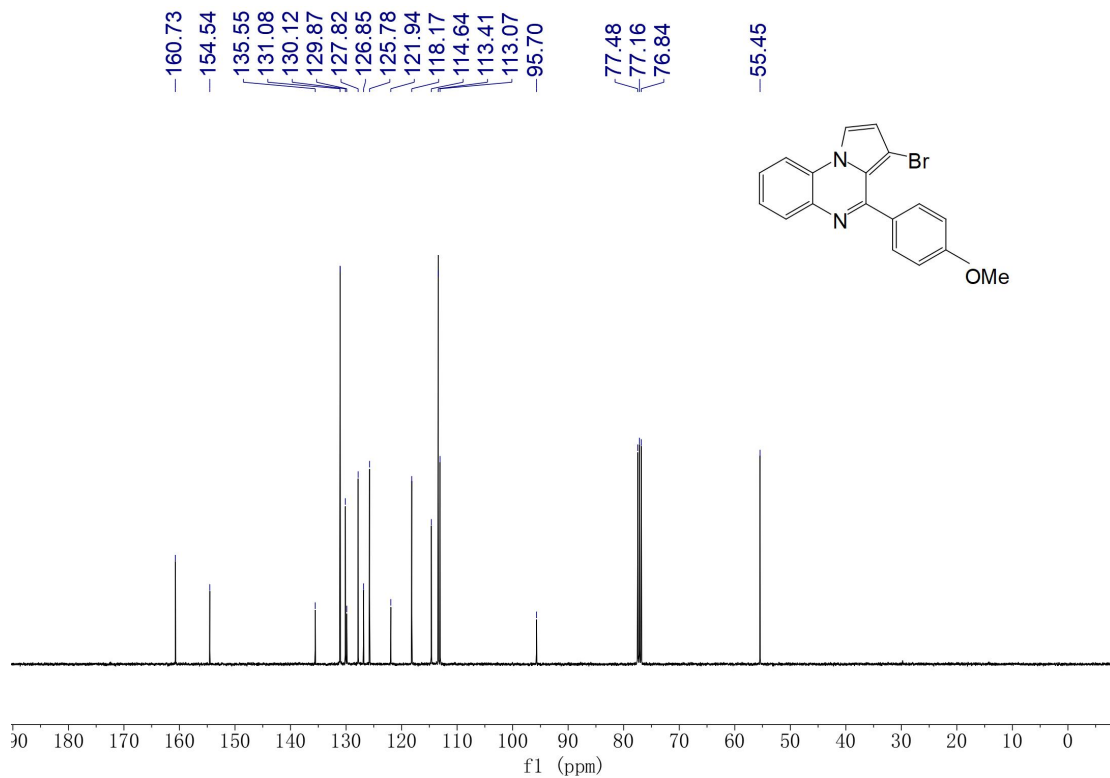

### 3-bromo-4-(4-chlorophenyl)pyrrolo[1,2-a]quinoxaline [3e]

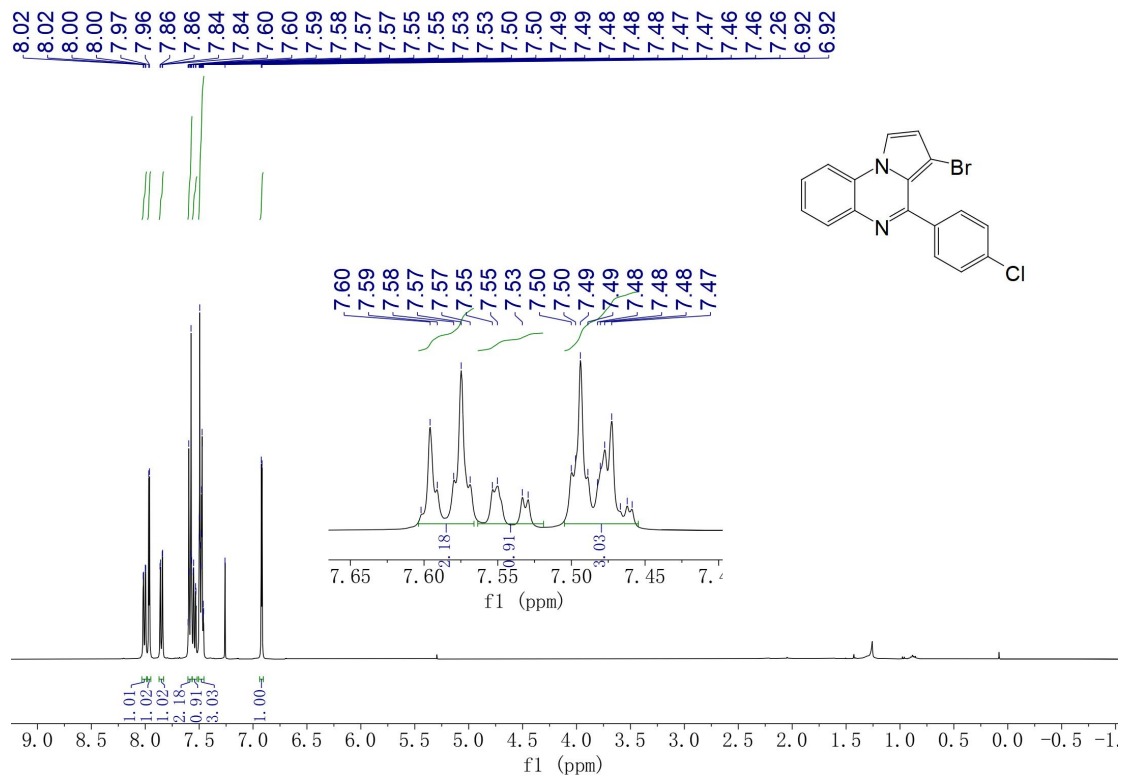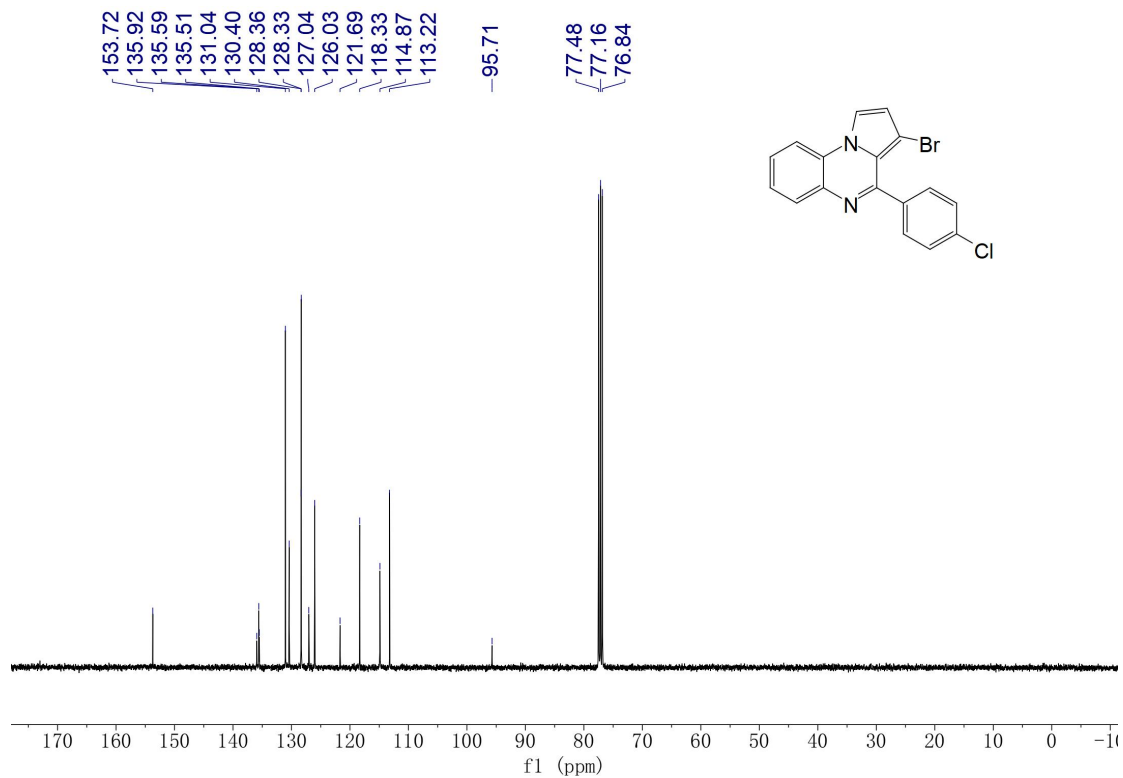

### 3-bromo-4-(4-bromophenyl)pyrrolo[1,2-a]quinoxaline [3f]

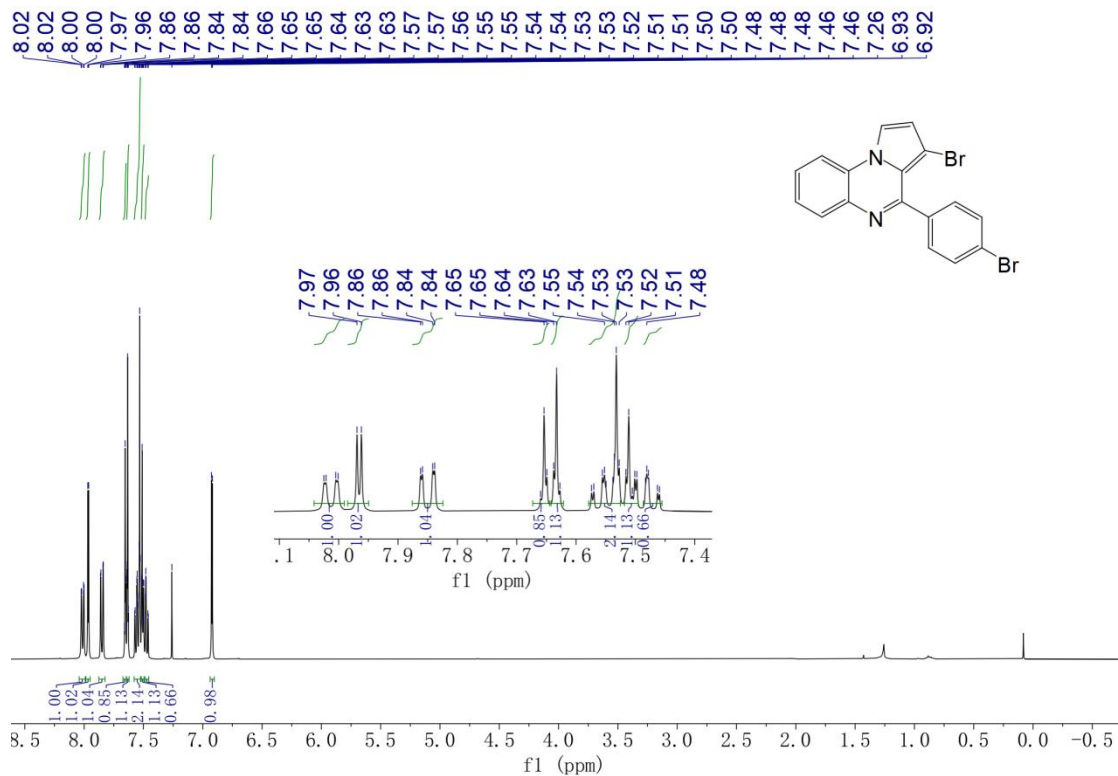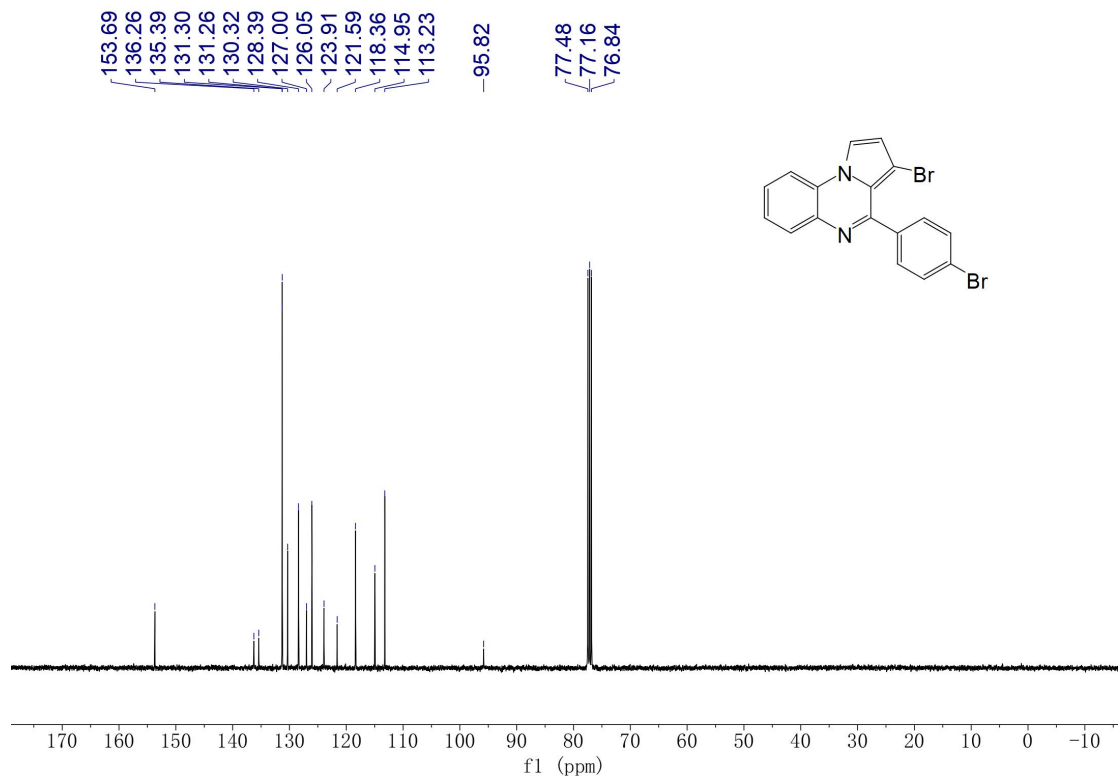

**3-bromo-4-(4-fluorophenyl)pyrrolo[1,2-a]quinoxaline [3g]**

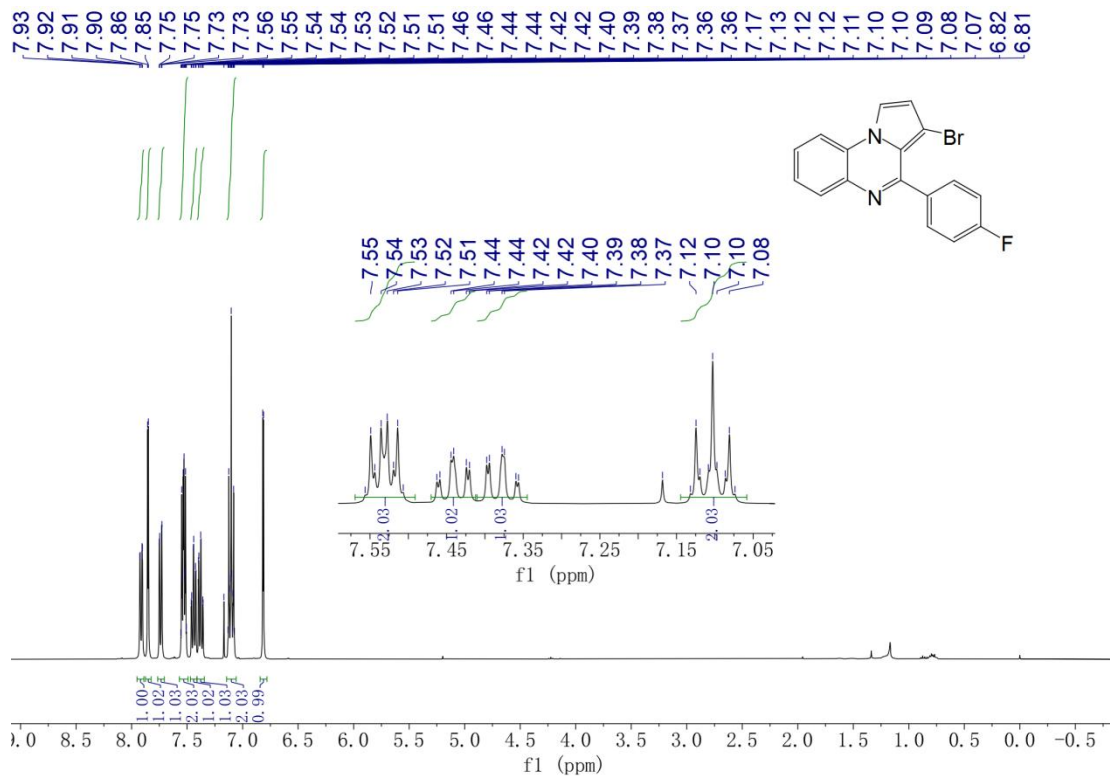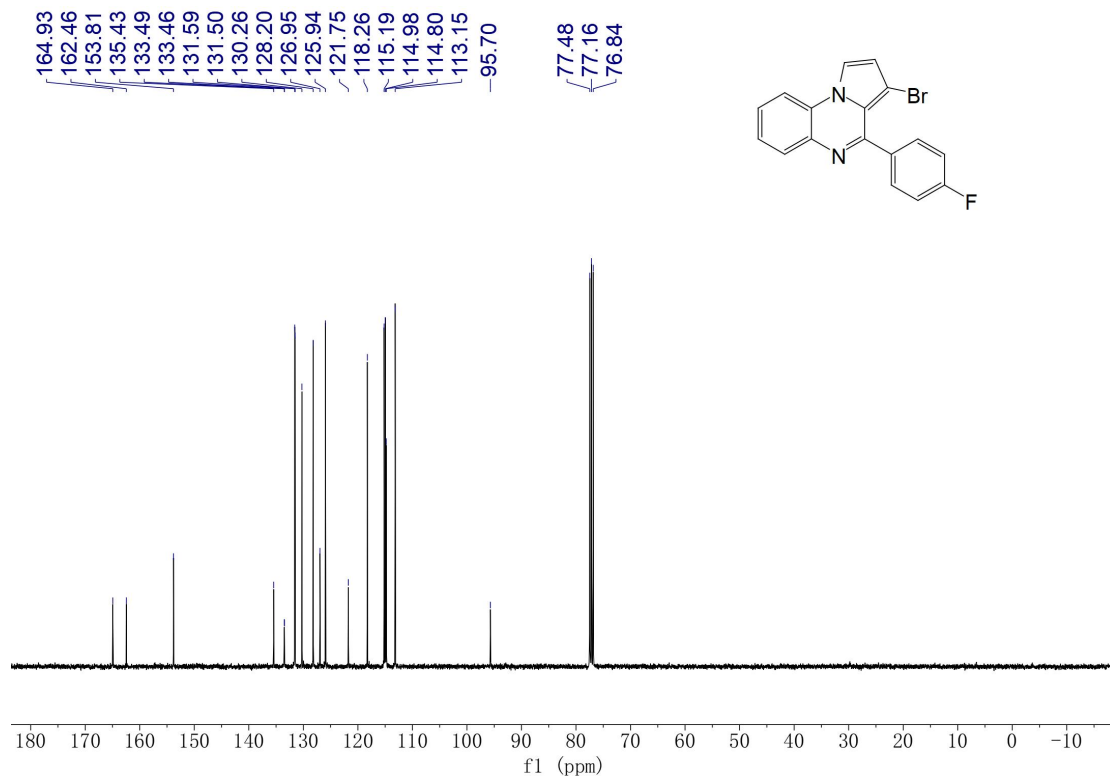

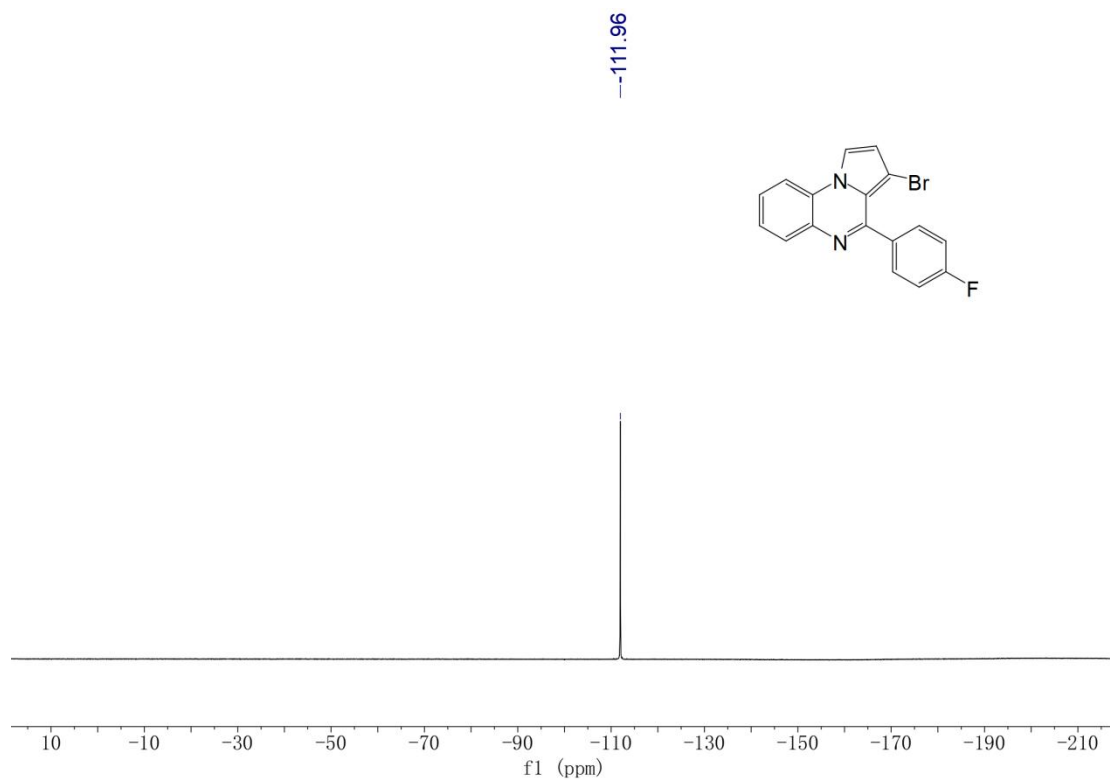

**3-bromo-4-(4-nitrophenyl)pyrrolo[1,2-a]quinoxaline [3h]**

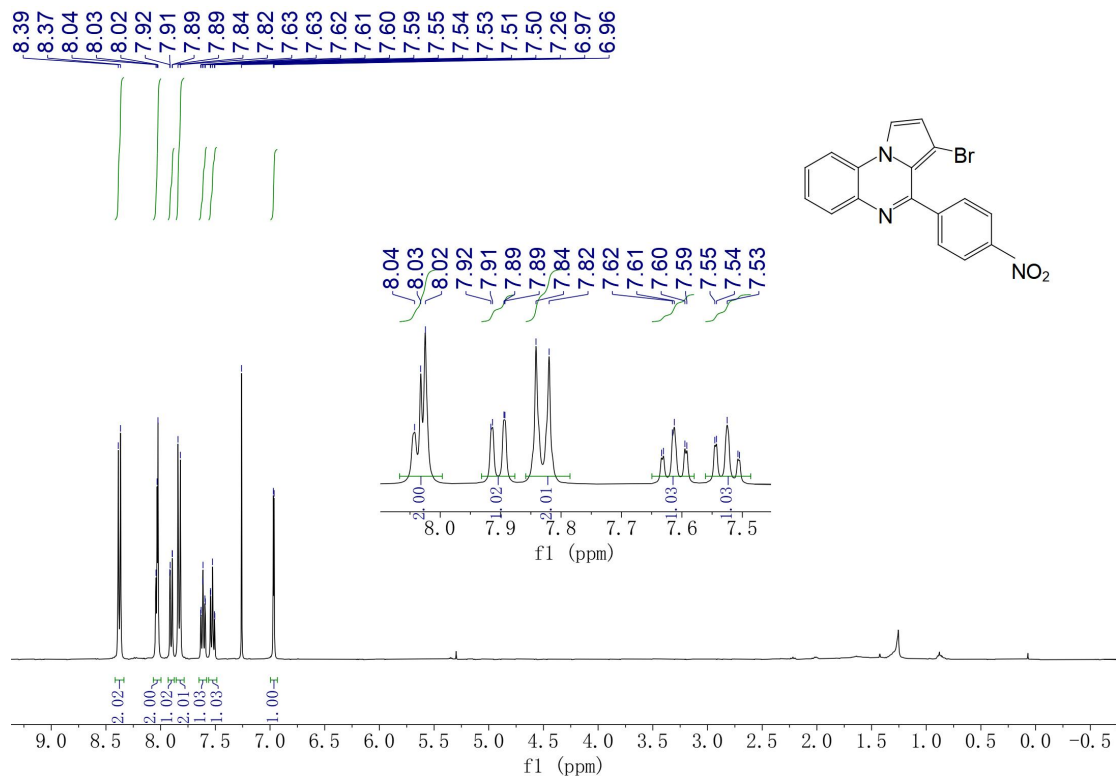

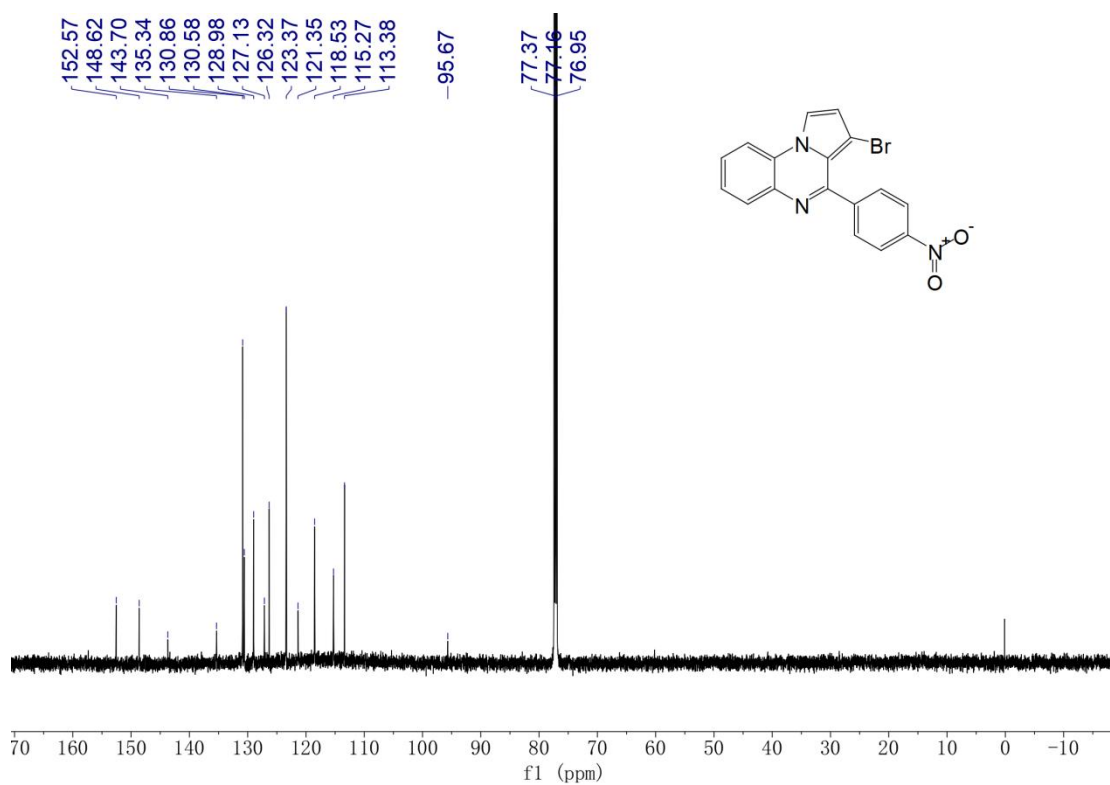

### 3-bromo-4-(2,4-dichlorophenyl)pyrrolo[1,2-a]quinoxaline [3i]

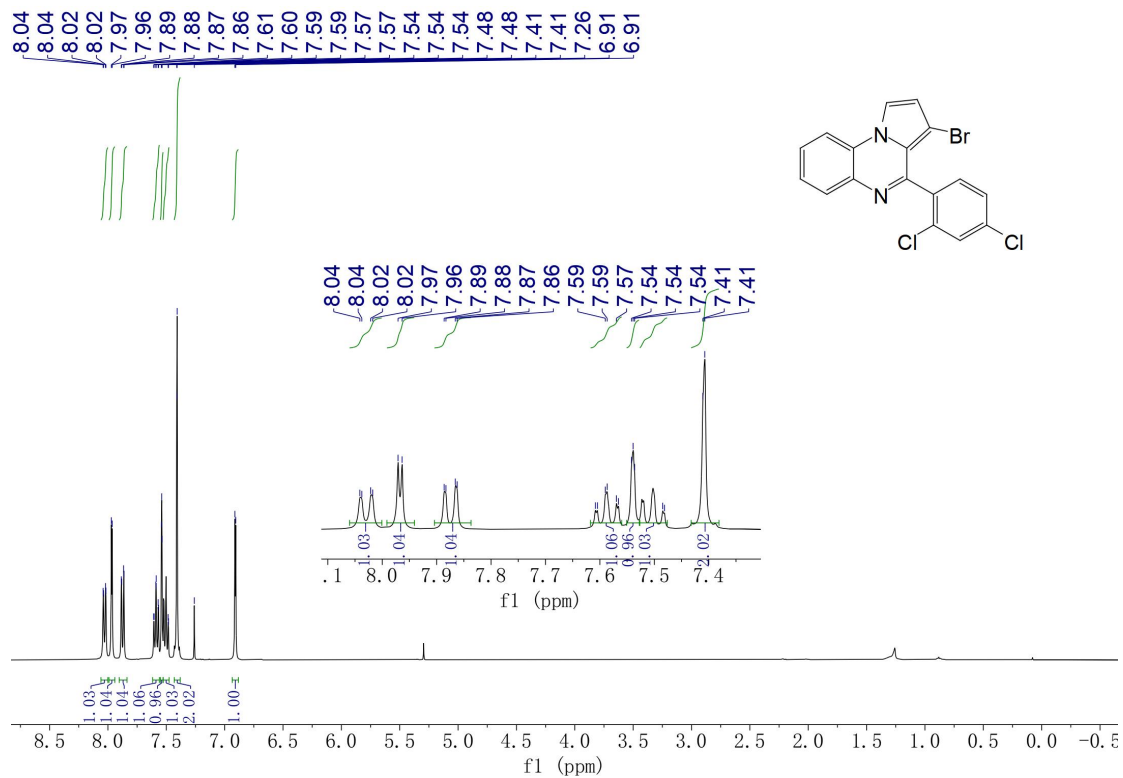



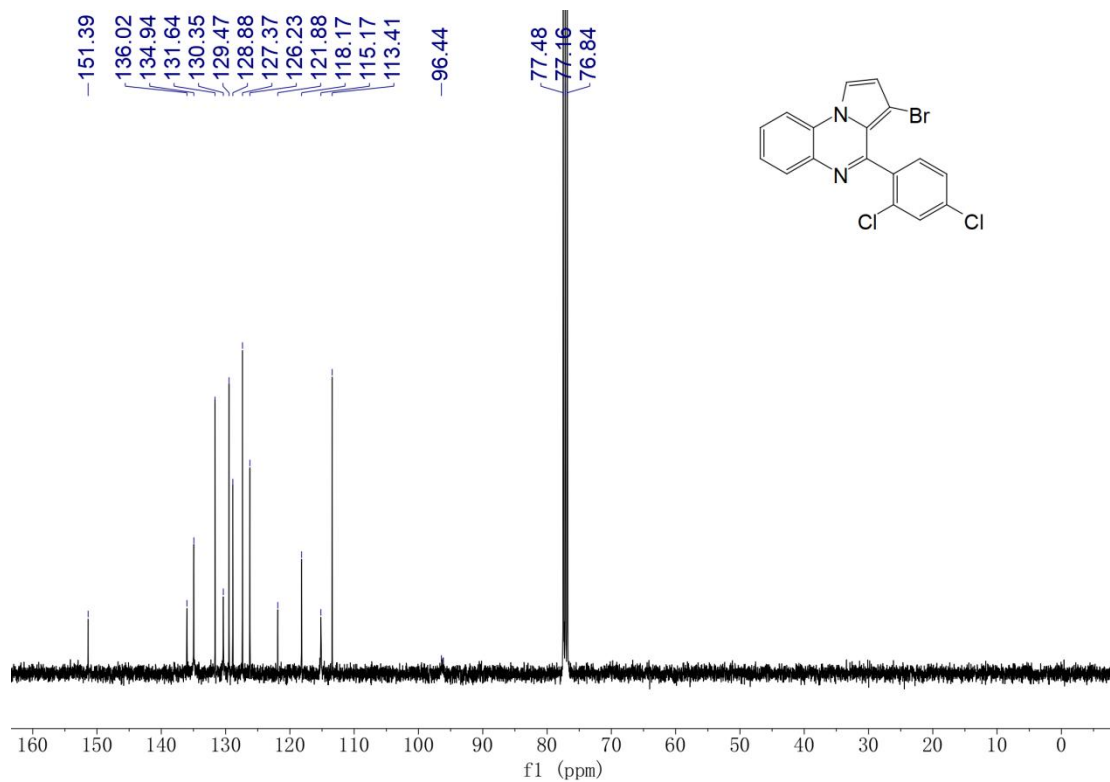

### 3-bromo-1-phenylpyrrolo[1,2-a]quinoxaline [3j]

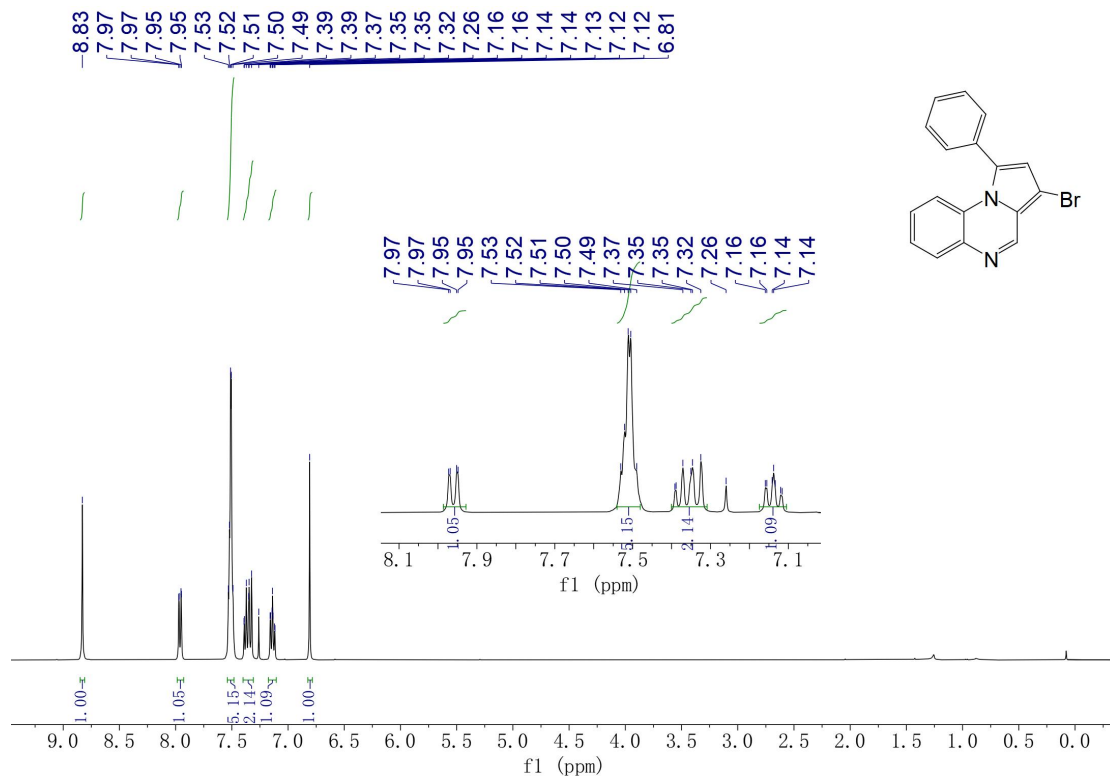

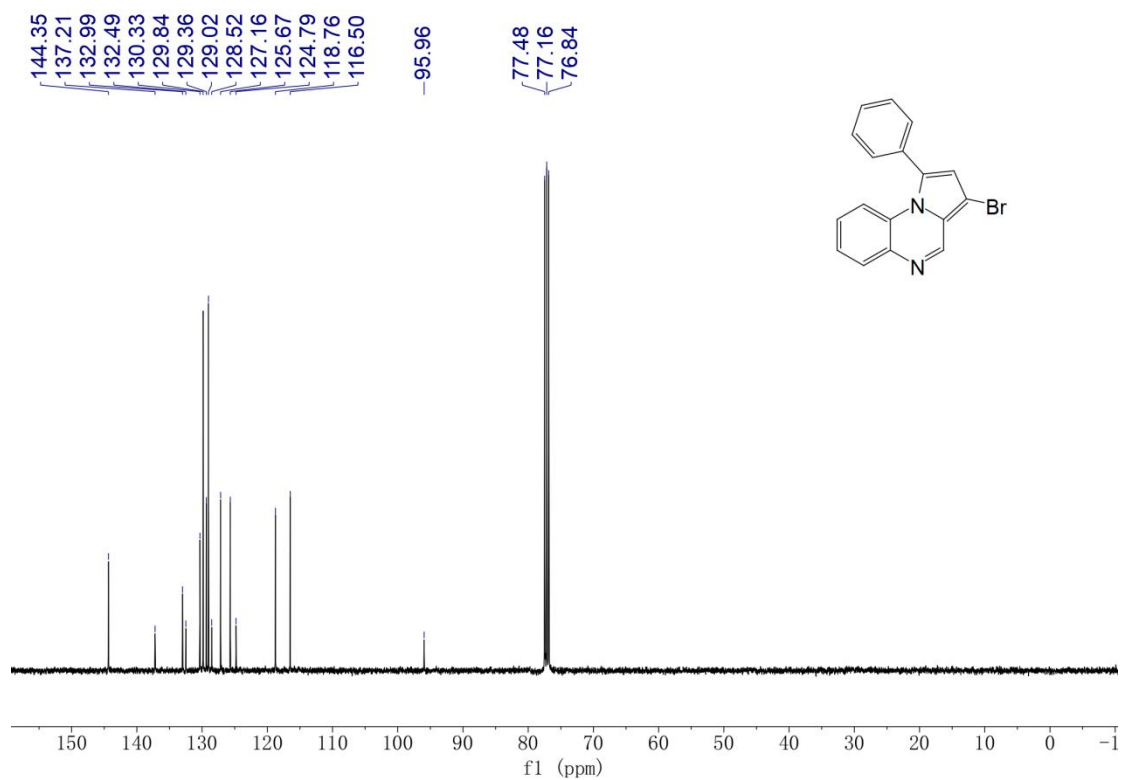

### 3-bromo-1-(p-tolyl)pyrrolo[1,2-a]quinoxaline [3k]

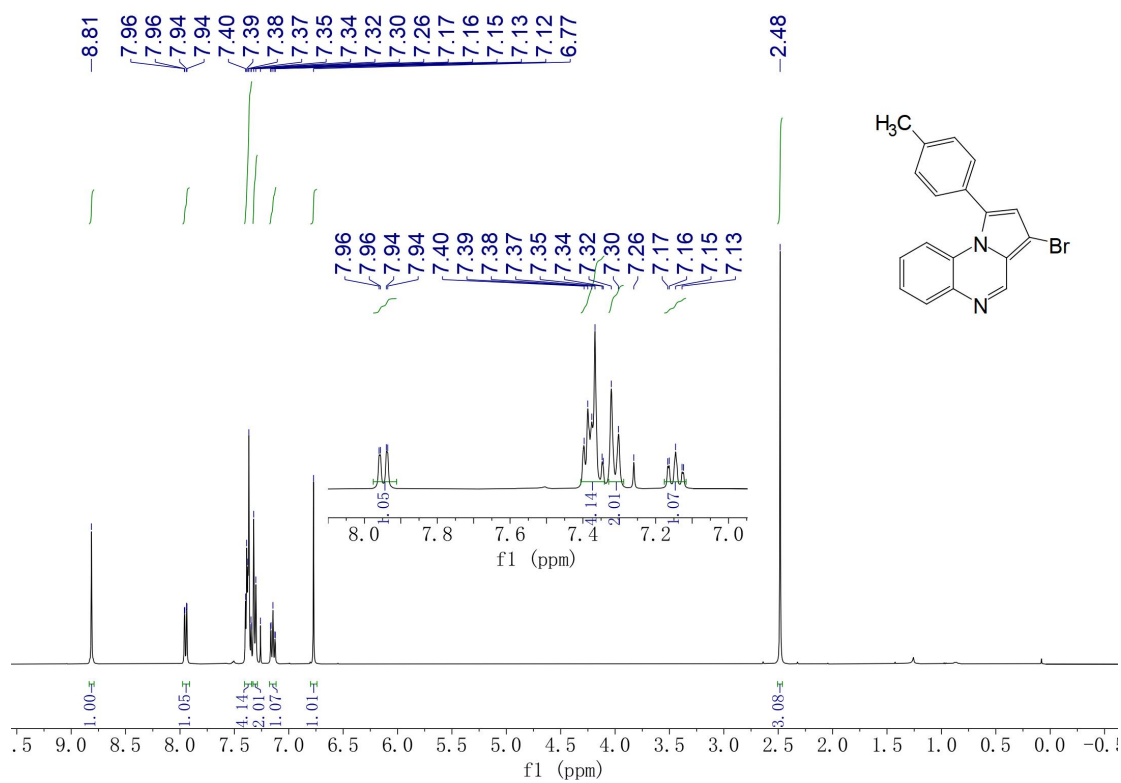

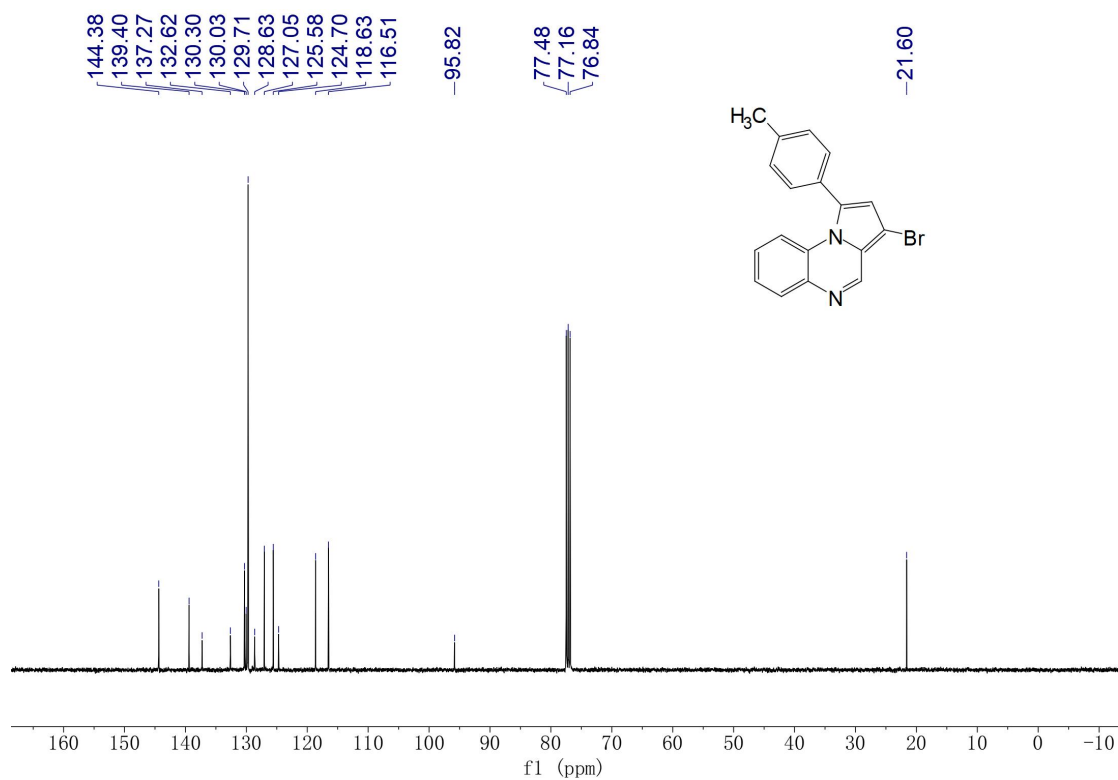

### 3-bromo-1-(4-methoxyphenyl)pyrrolo[1,2-*a*]quinoxaline [31]

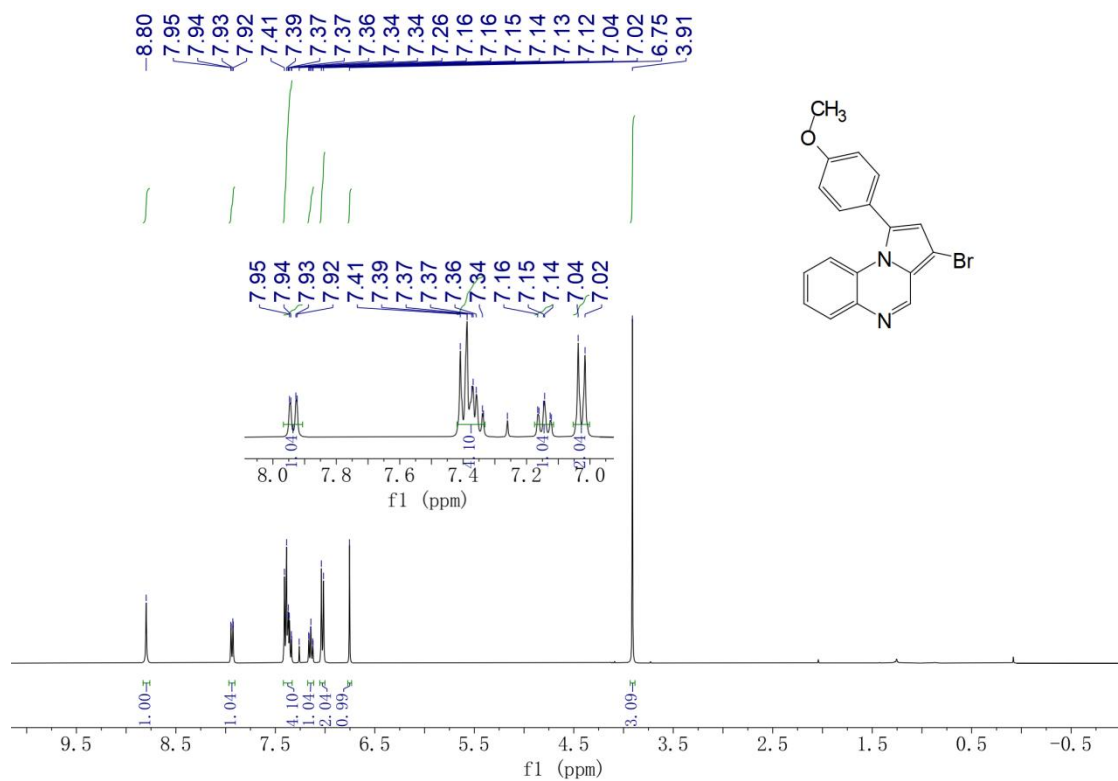

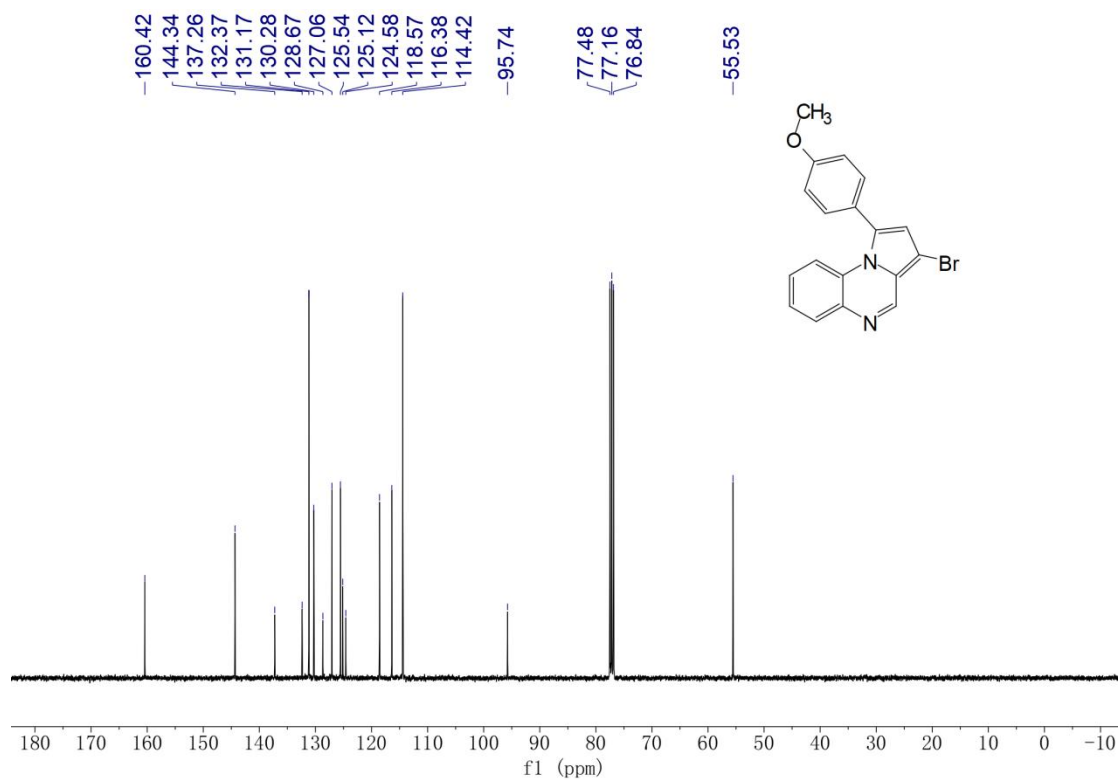

### 3-bromo-7-methylpyrrolo[1,2-a]quinoxaline [3m]

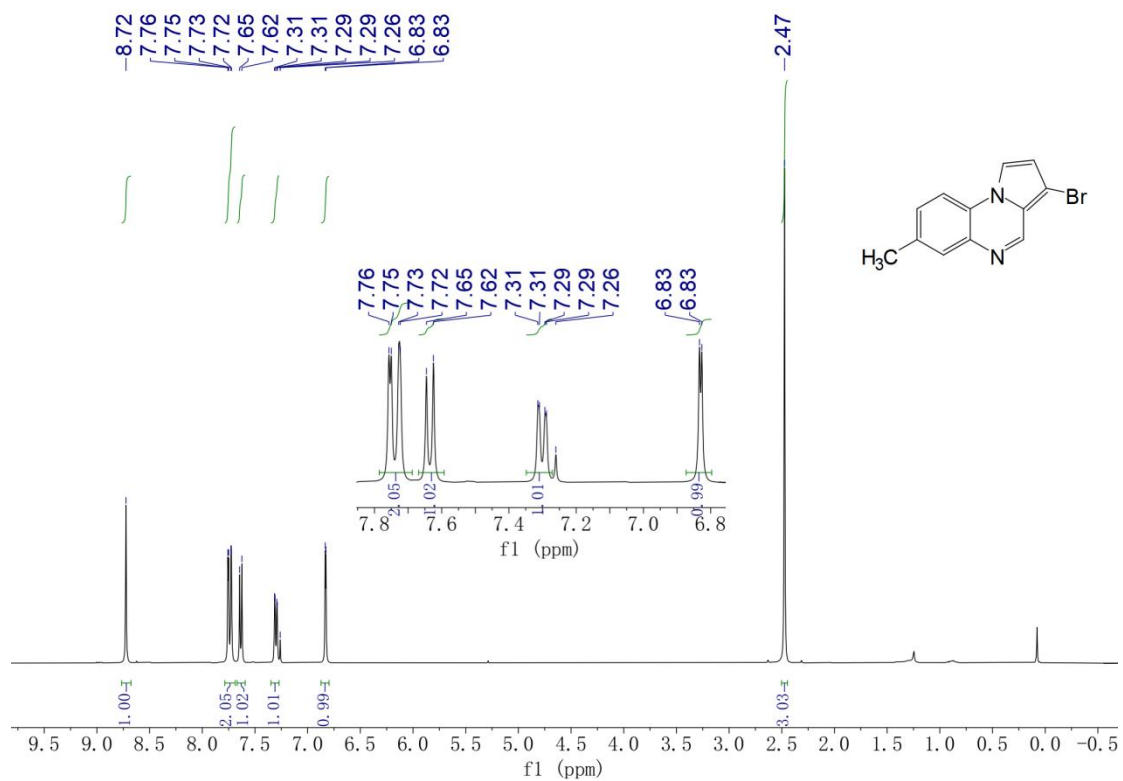

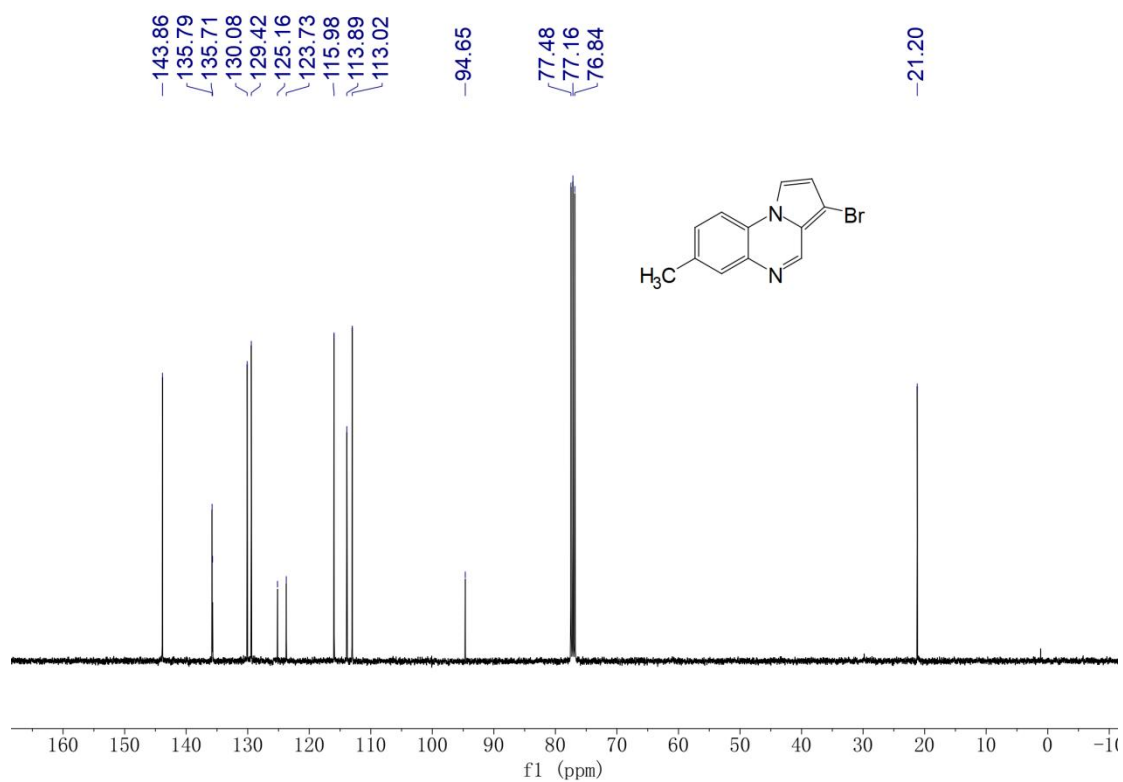

### 3-bromo-7-chloropyrrolo[1,2-a]quinoxaline [3n]

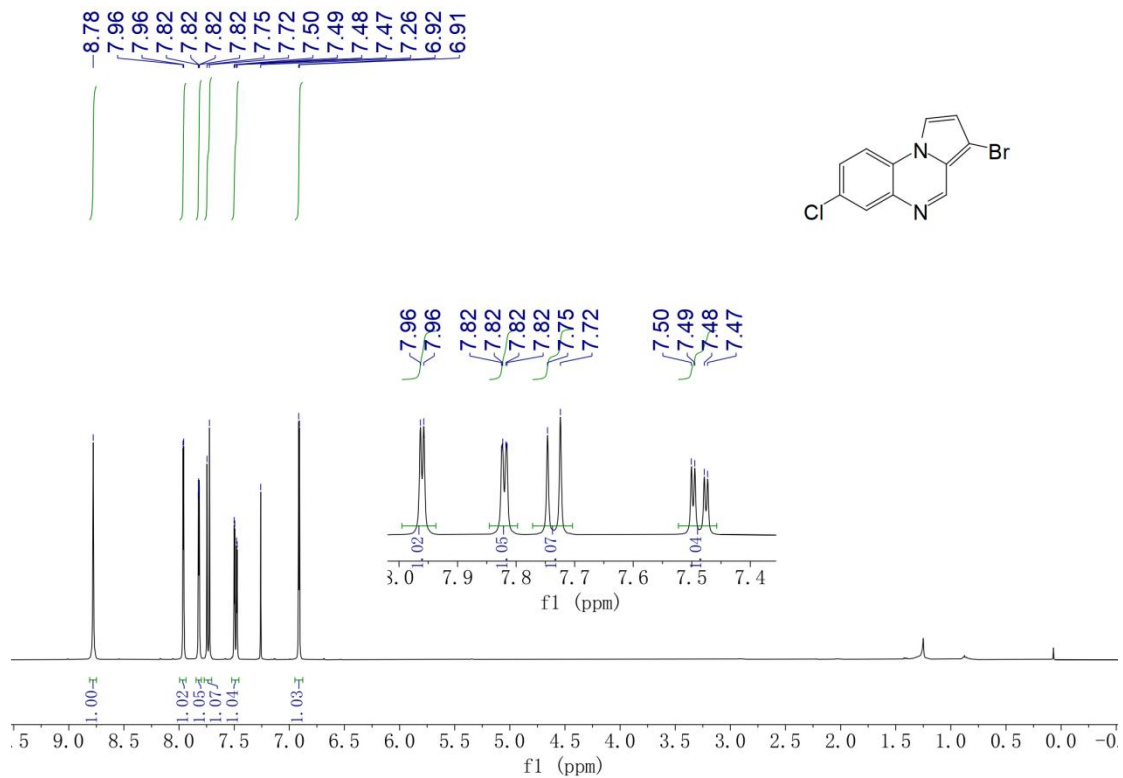

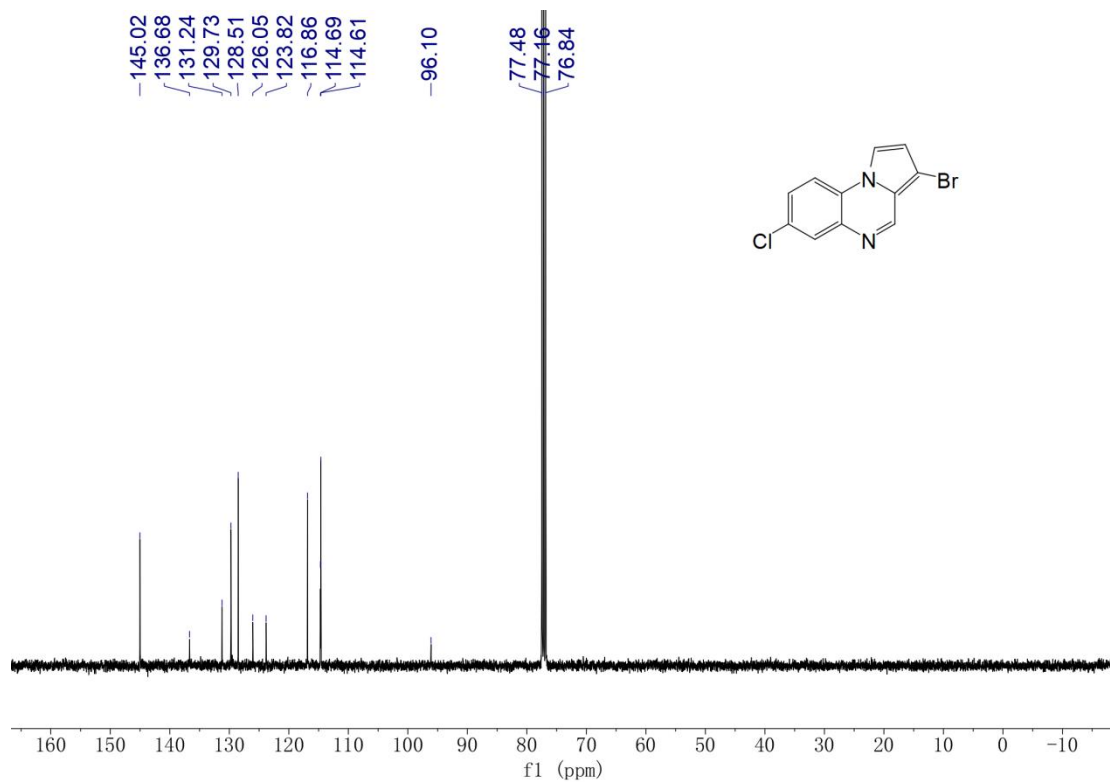

**3-bromo-4-(4-methoxyphenyl)-7-methylpyrrolo[1,2-*a*]quinoxaline [3o]**

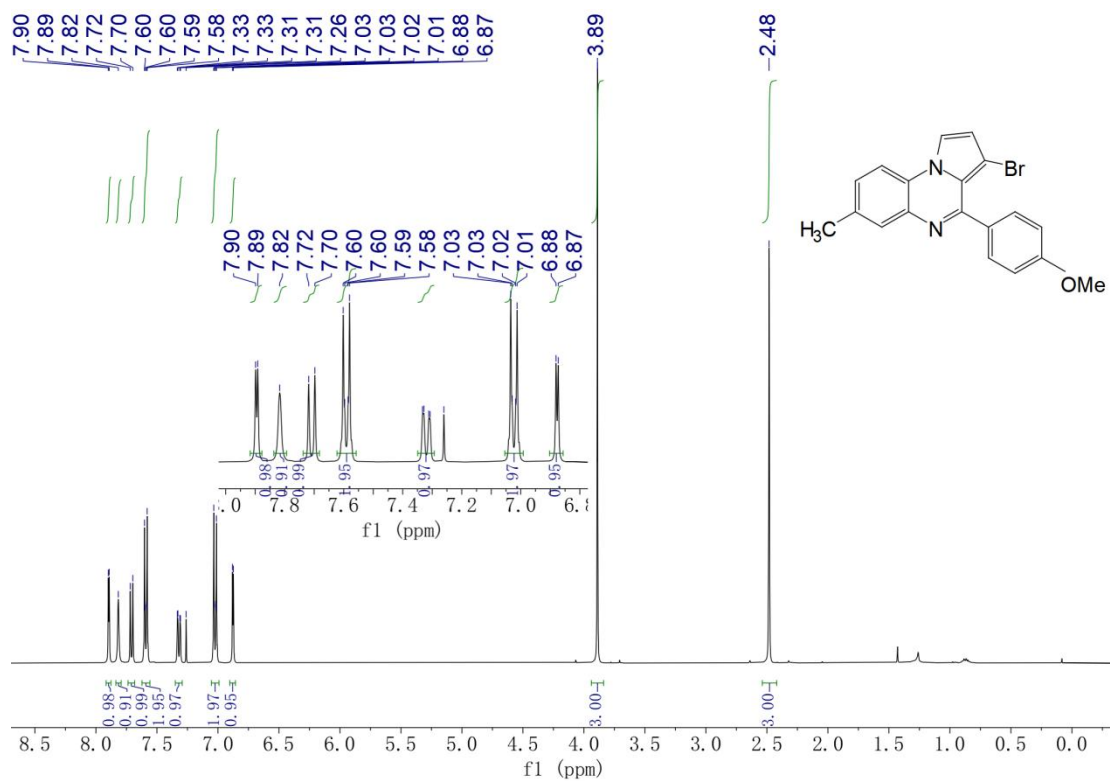

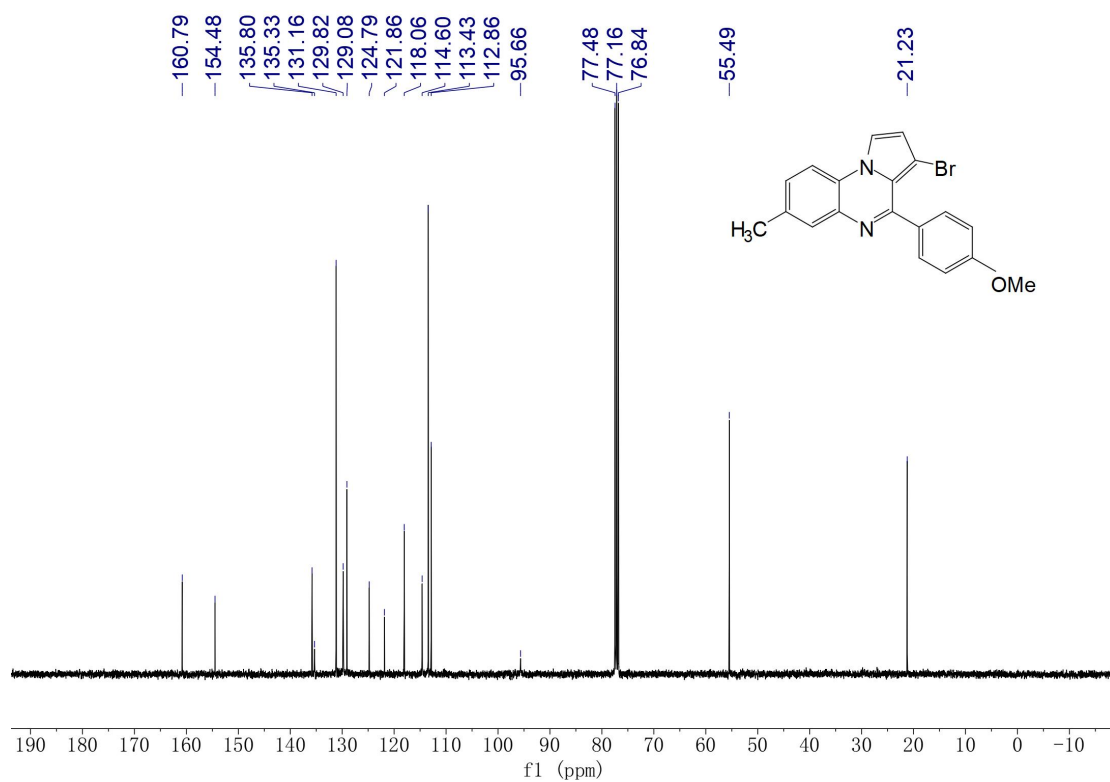

### 3-bromo-4-(4-bromophenyl)-7-methylpyrrolo[1,2-a]quinoxaline [3p]

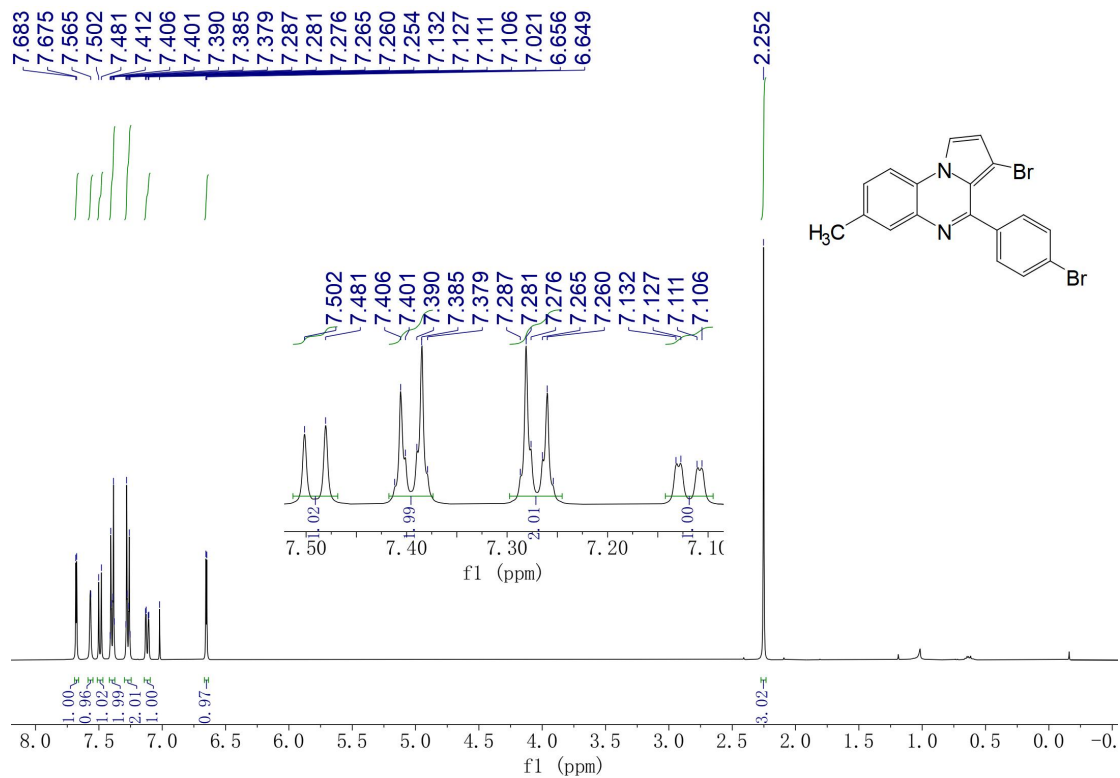

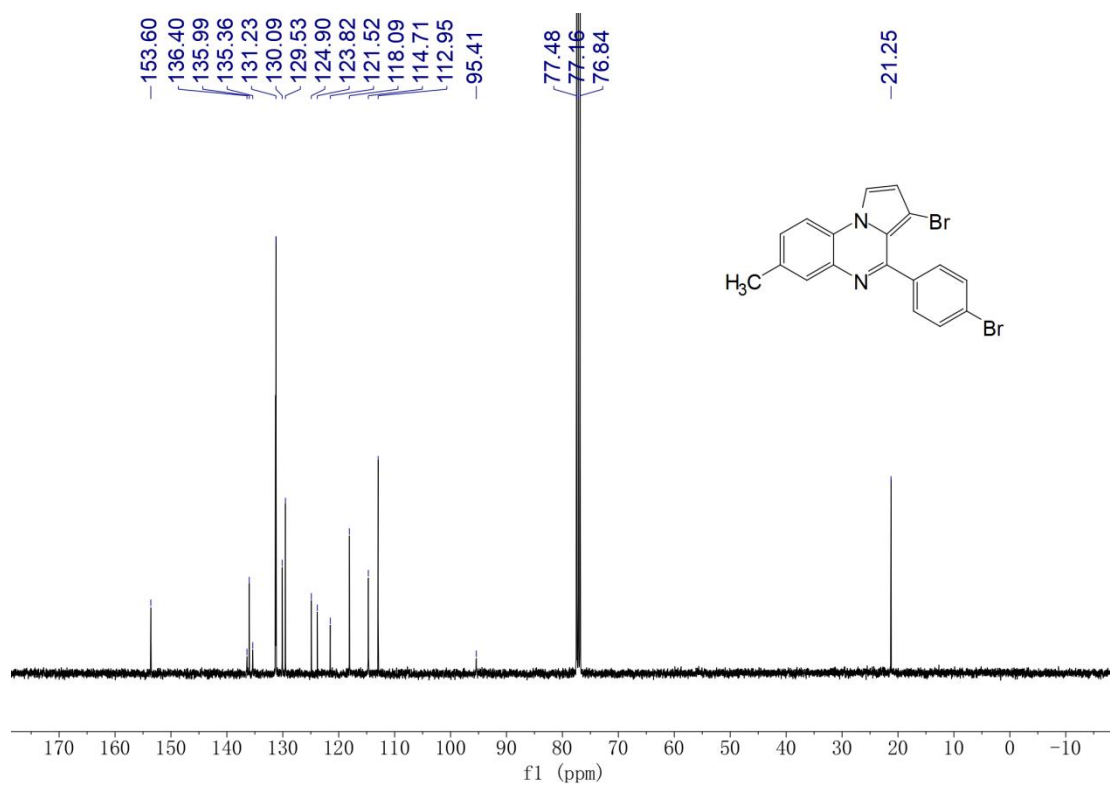

### 3-bromo-8-methylpyrrolo[1,2-a]quinoxaline [3q]

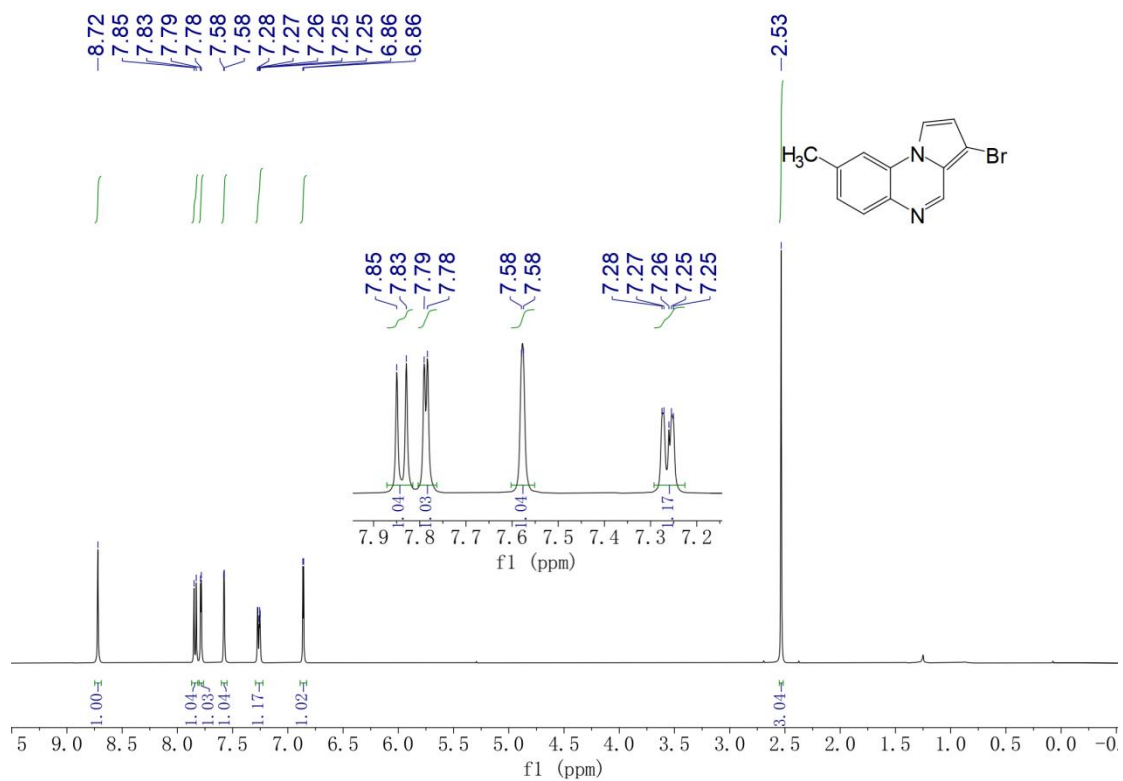



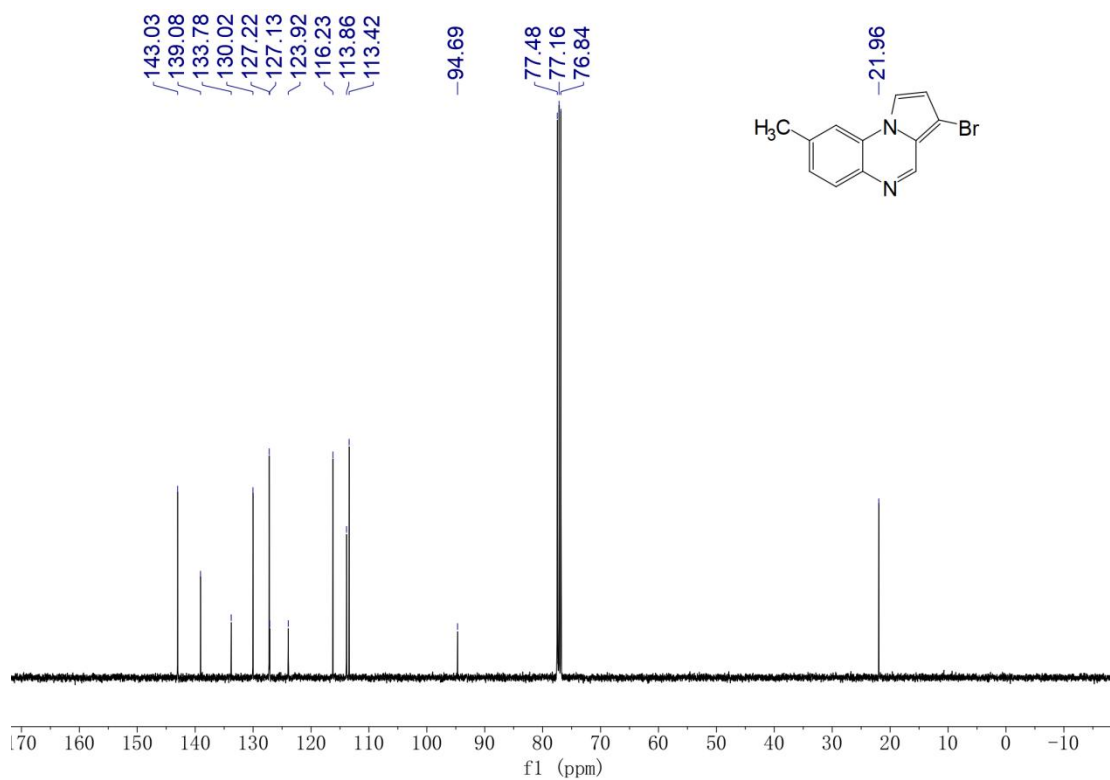

**3-bromo-8-chloropyrrolo[1,2-a]quinoxaline [3r]**

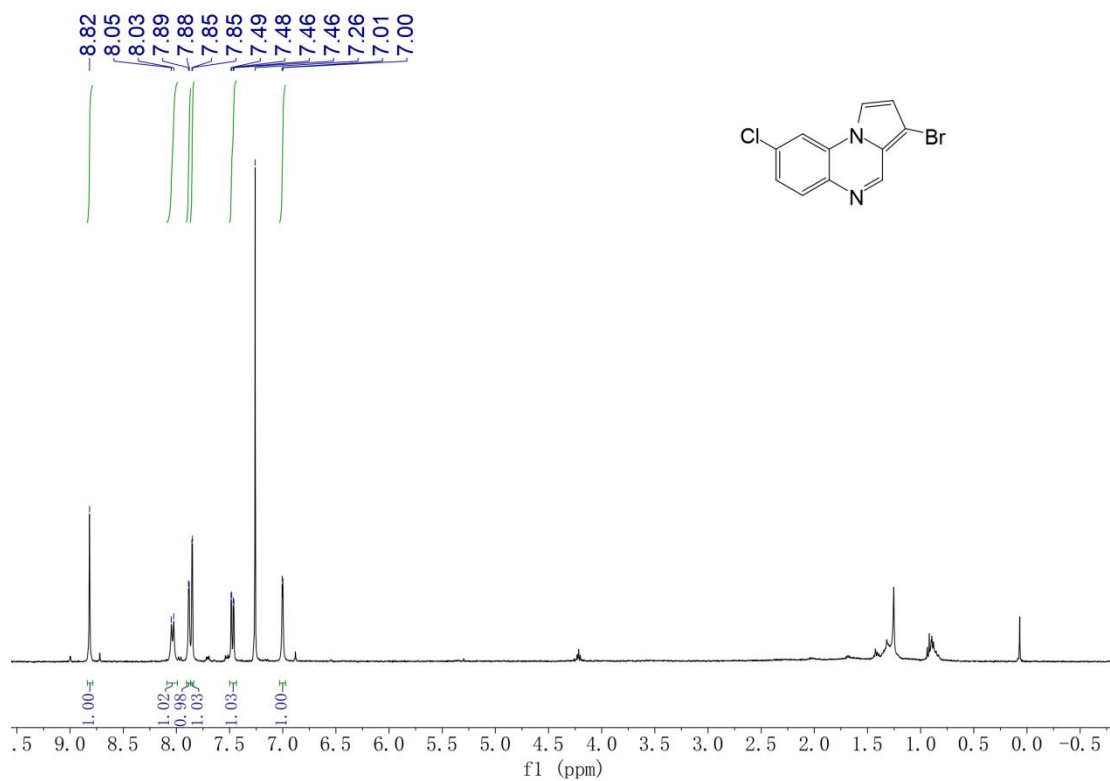

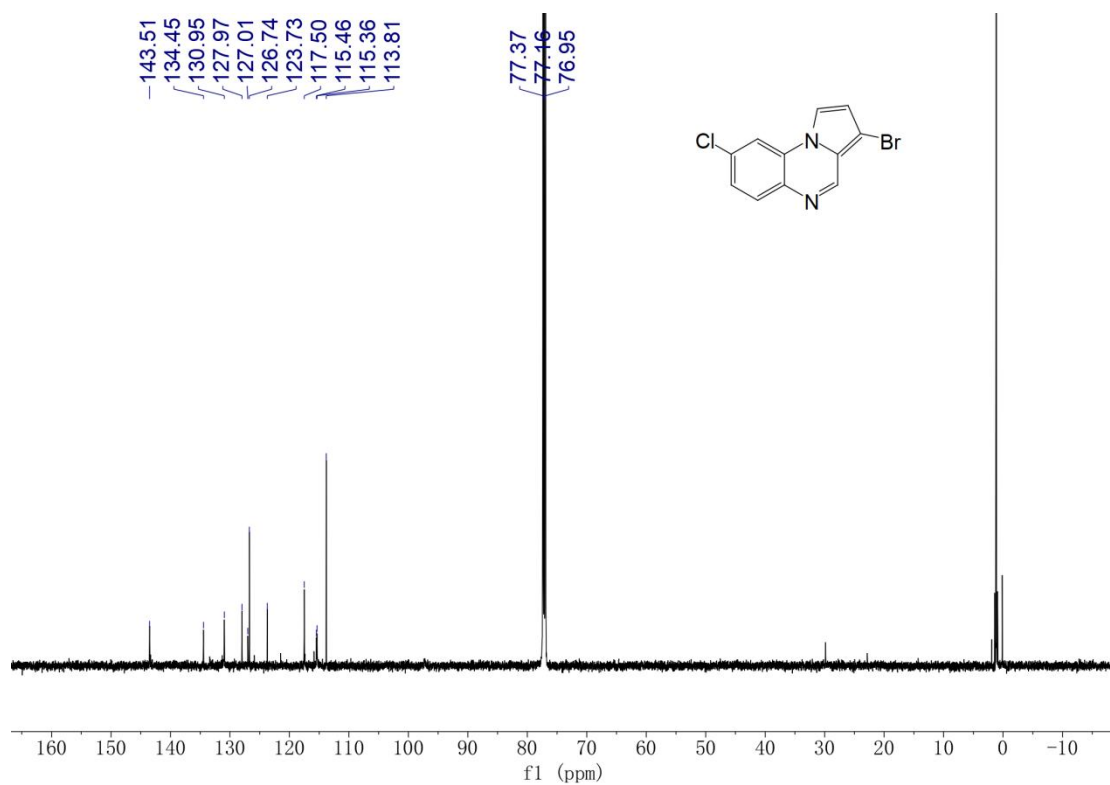

### 3-bromo-8-fluoropyrrolo[1,2-a]quinoxaline [3s]

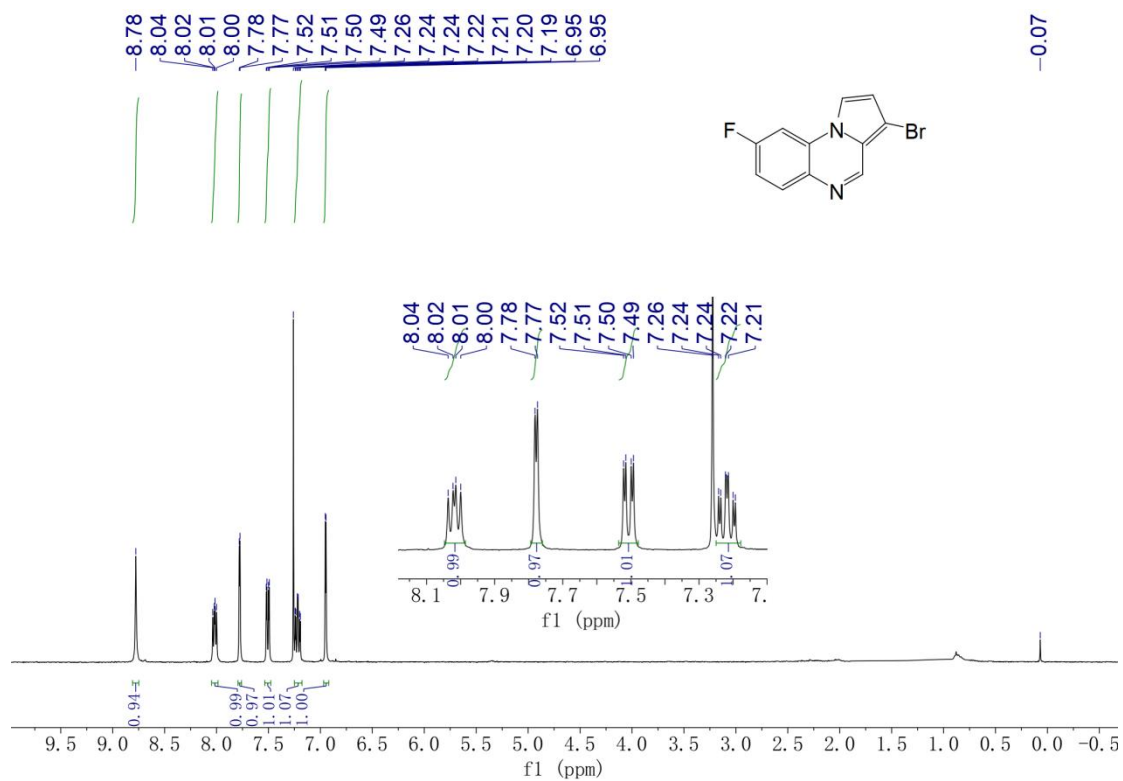

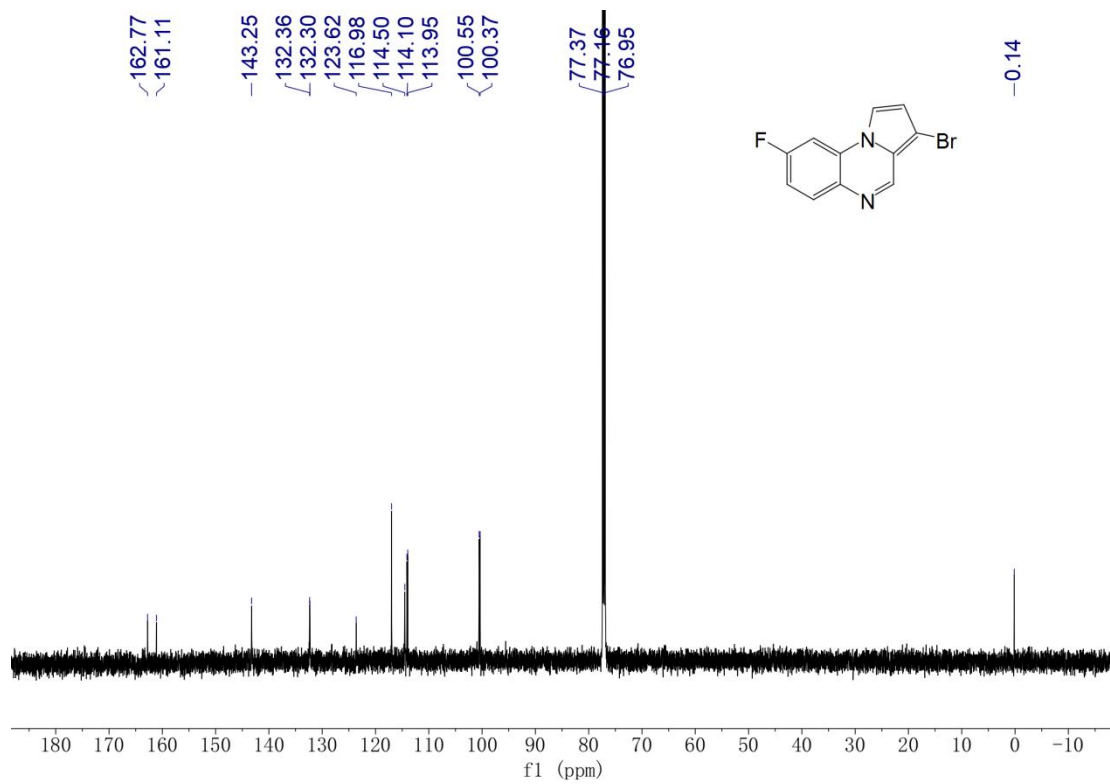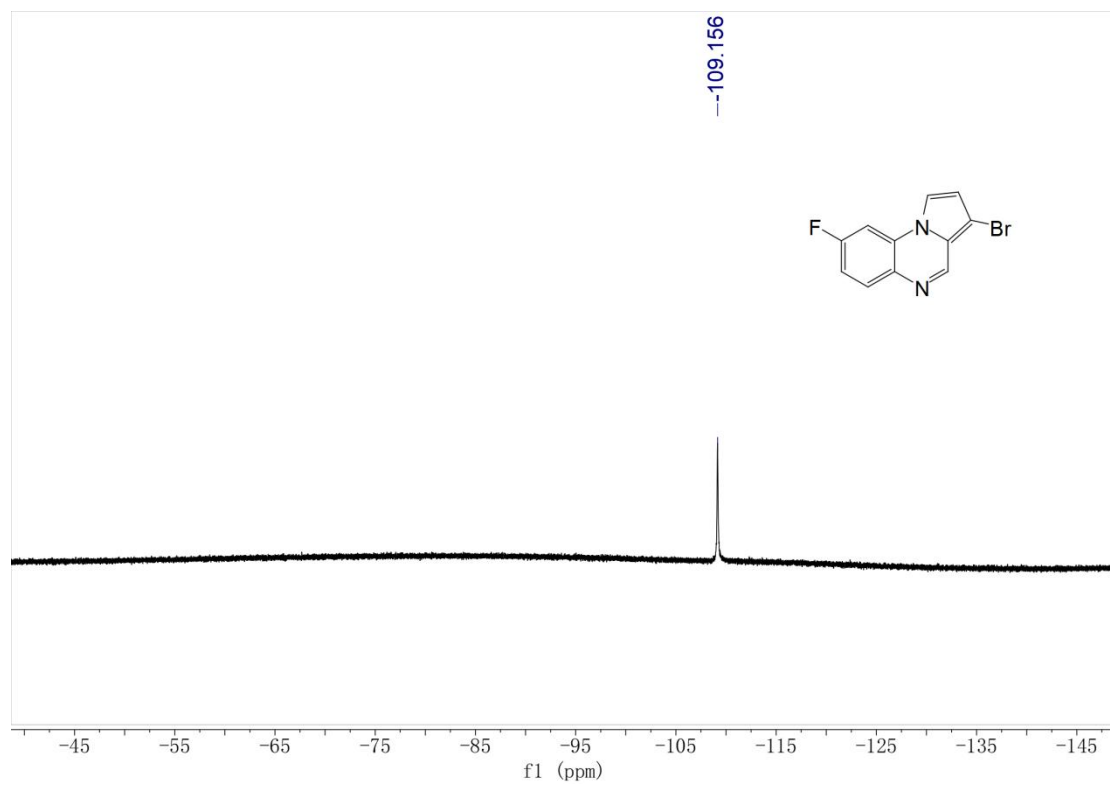

# 1-bromo-3-phenylpyrrolo[1,2-a]quinoxaline [3t]

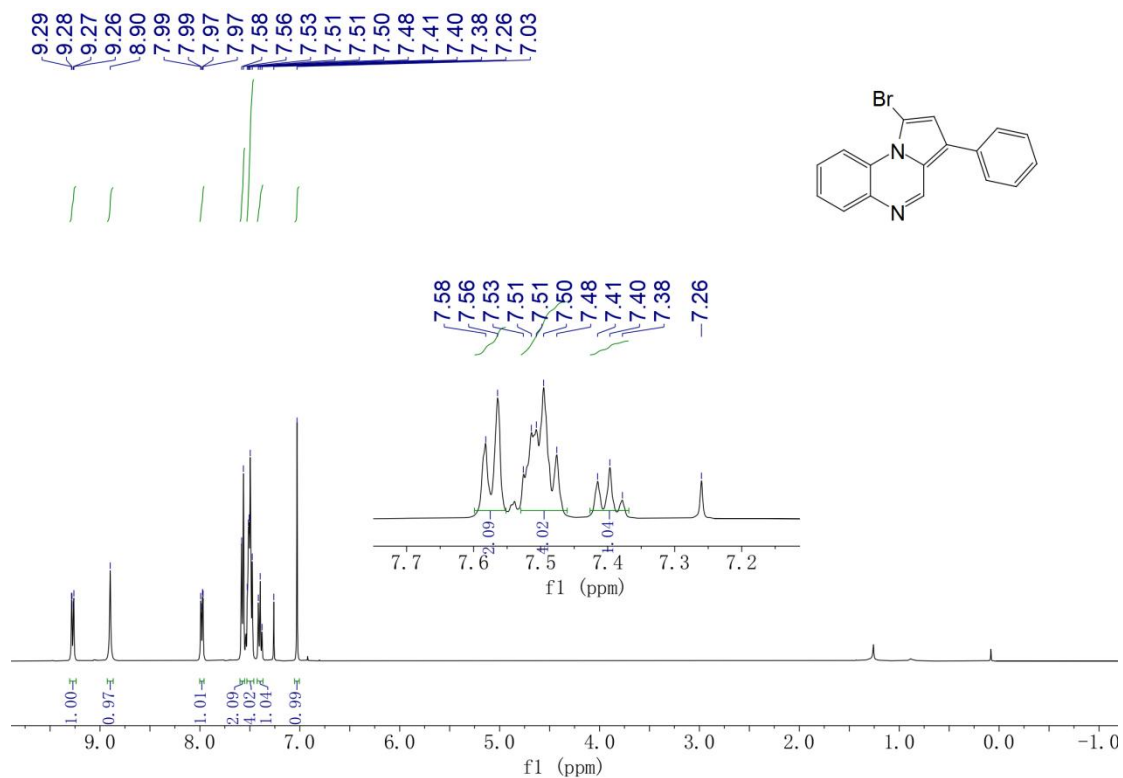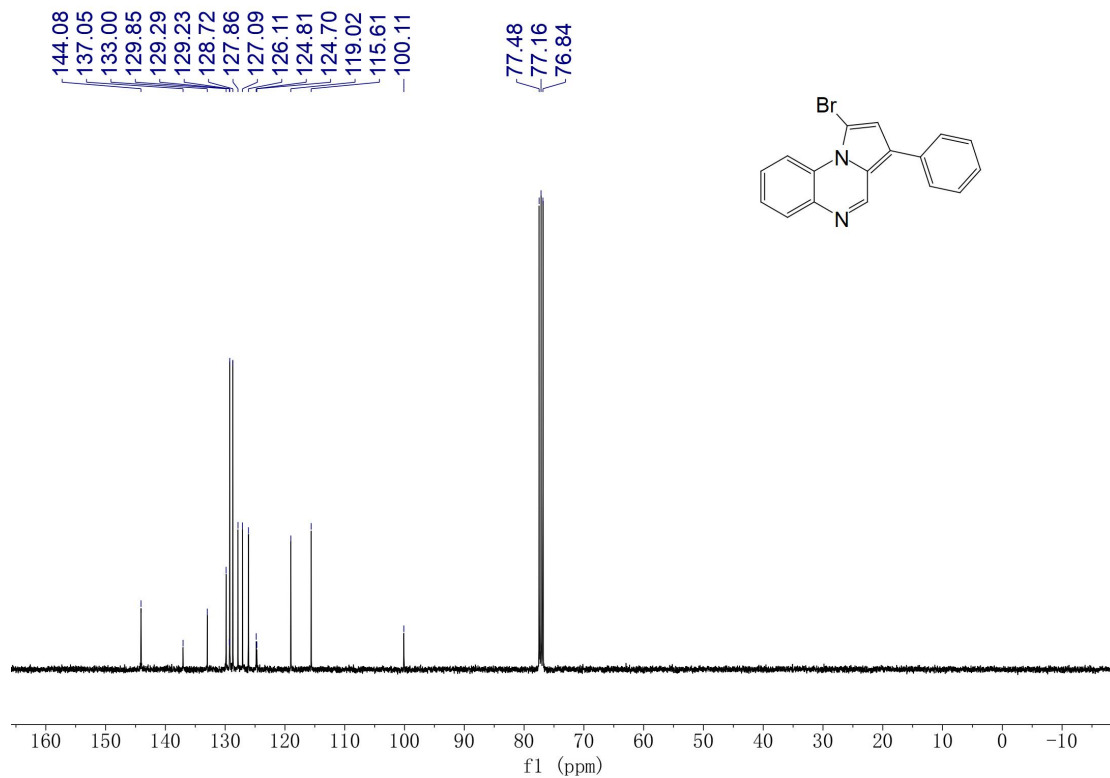

# 1-bromo-3-(p-tolyl)pyrrolo[1,2-a]quinoxaline [3u]

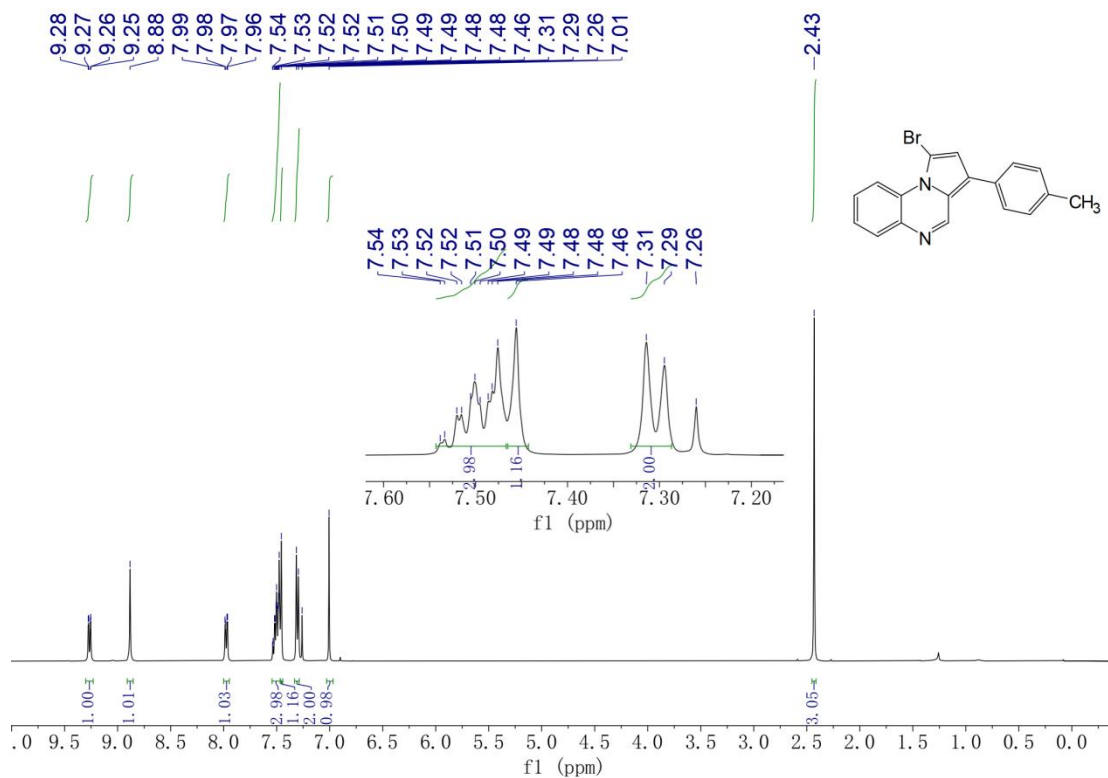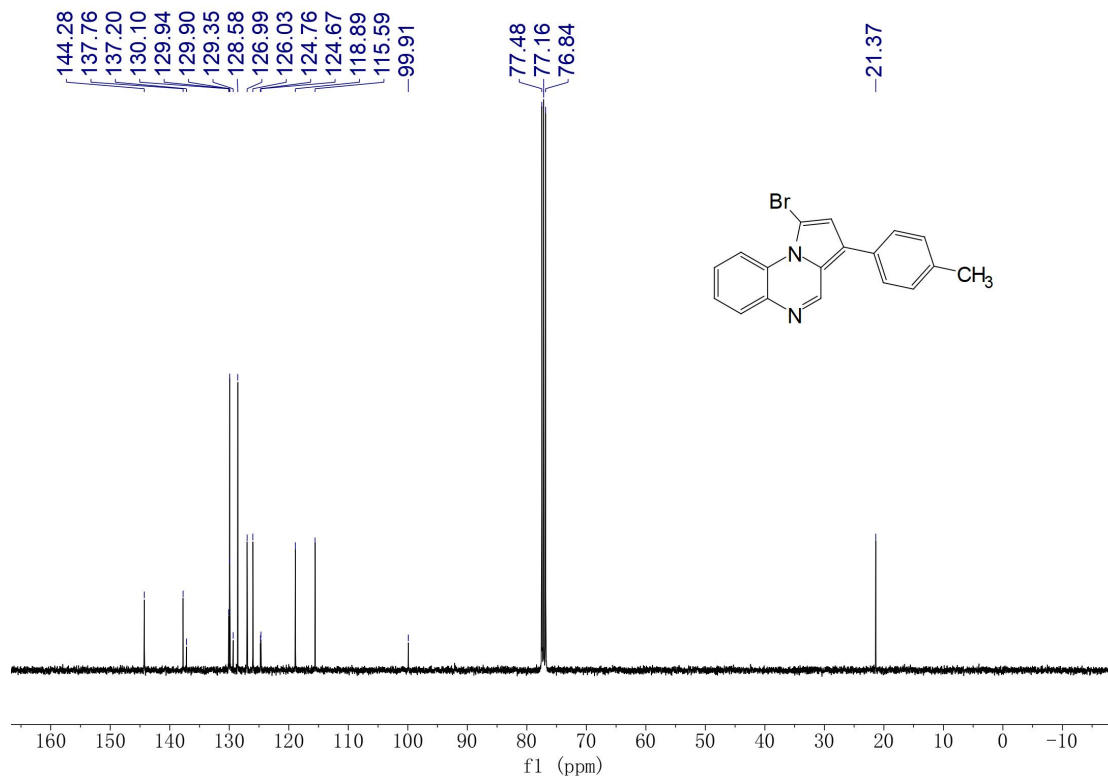

# 4-(1-bromopyrrolo[1,2-a]quinoxalin-3-yl)benzonitrile [3v]

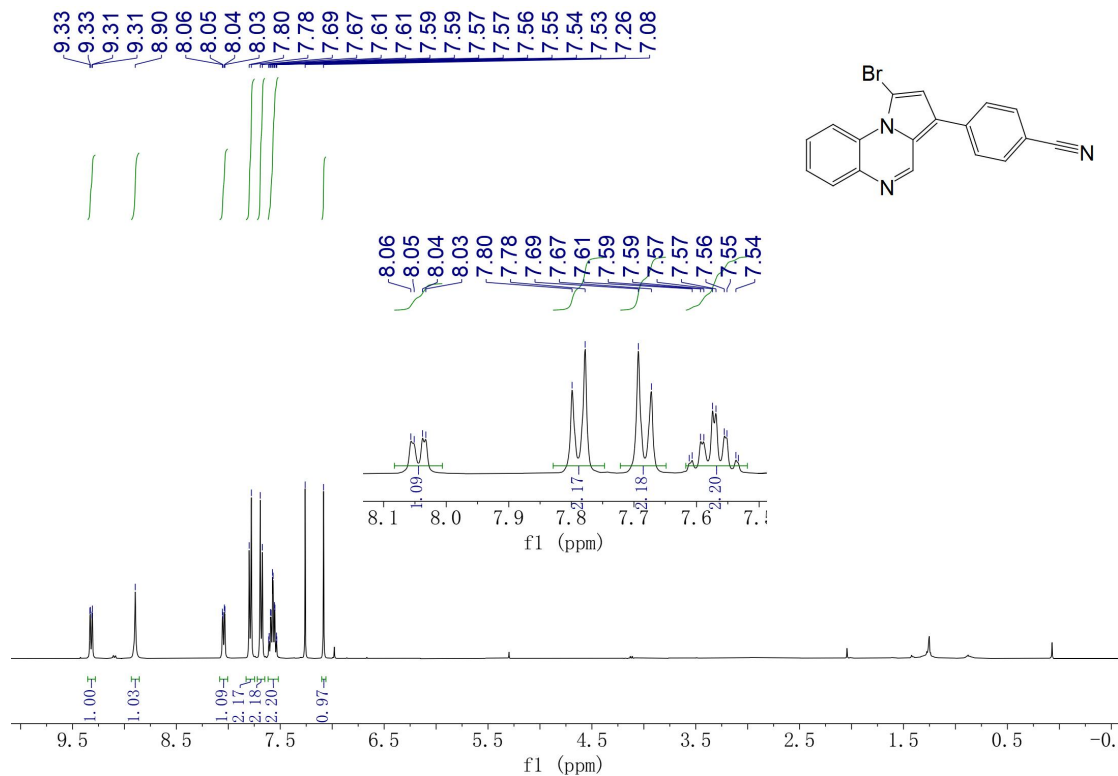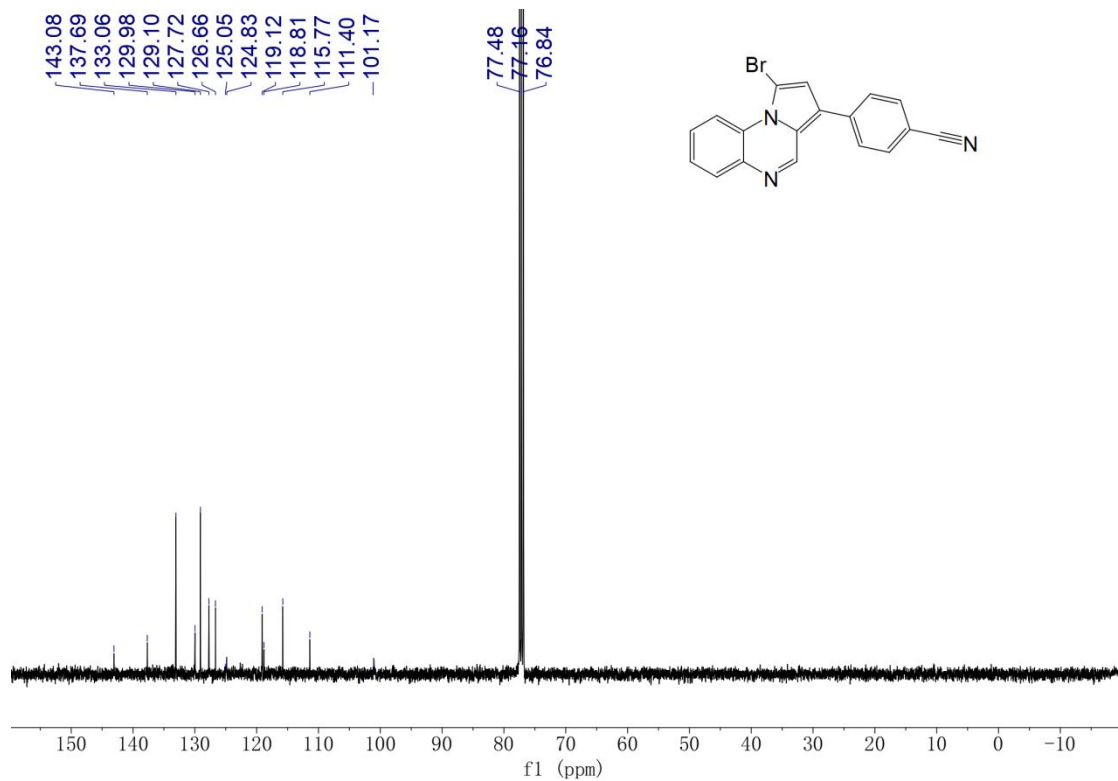

# 1,3-dibromopyrrolo[1,2-a]quinoxaline [4a]

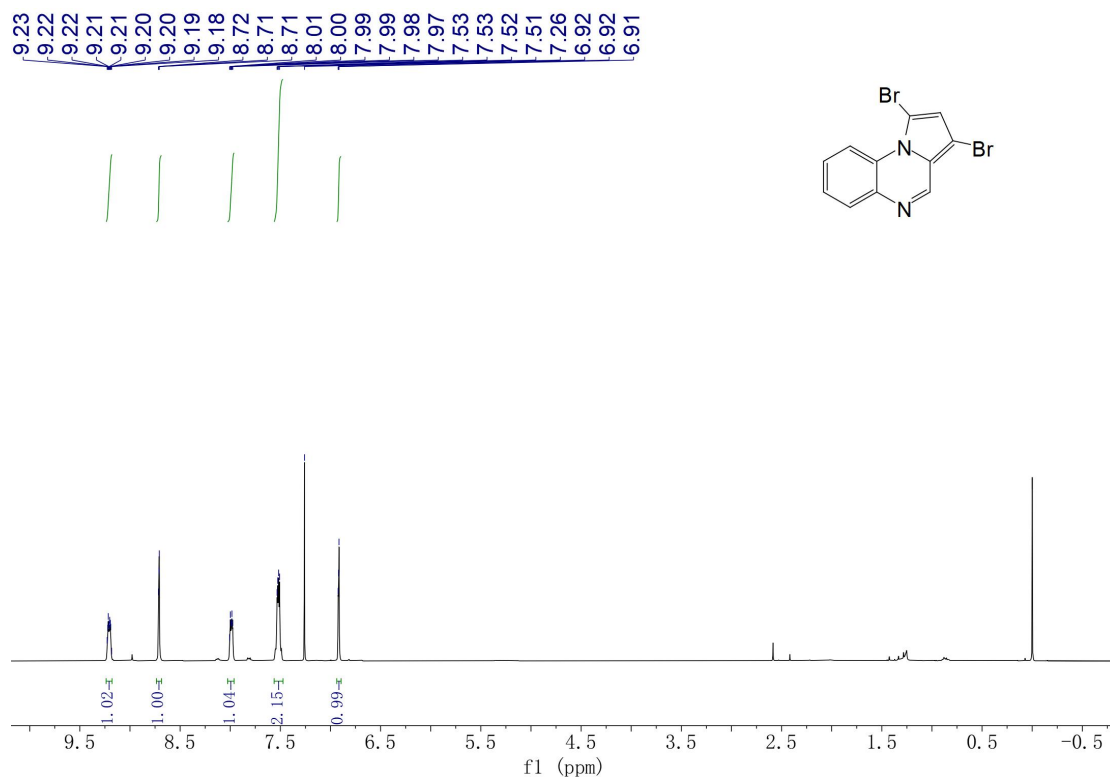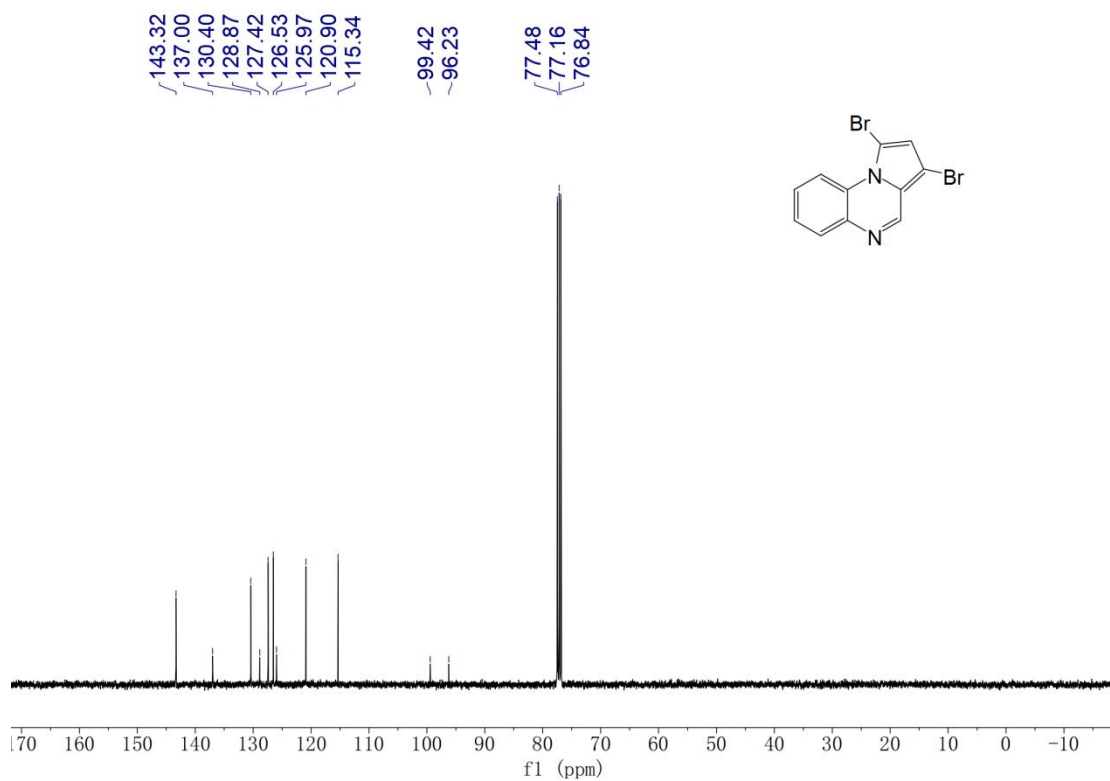

# 1,3-dibromo-4-phenylpyrrolo[1,2-a]quinoxaline [4b]

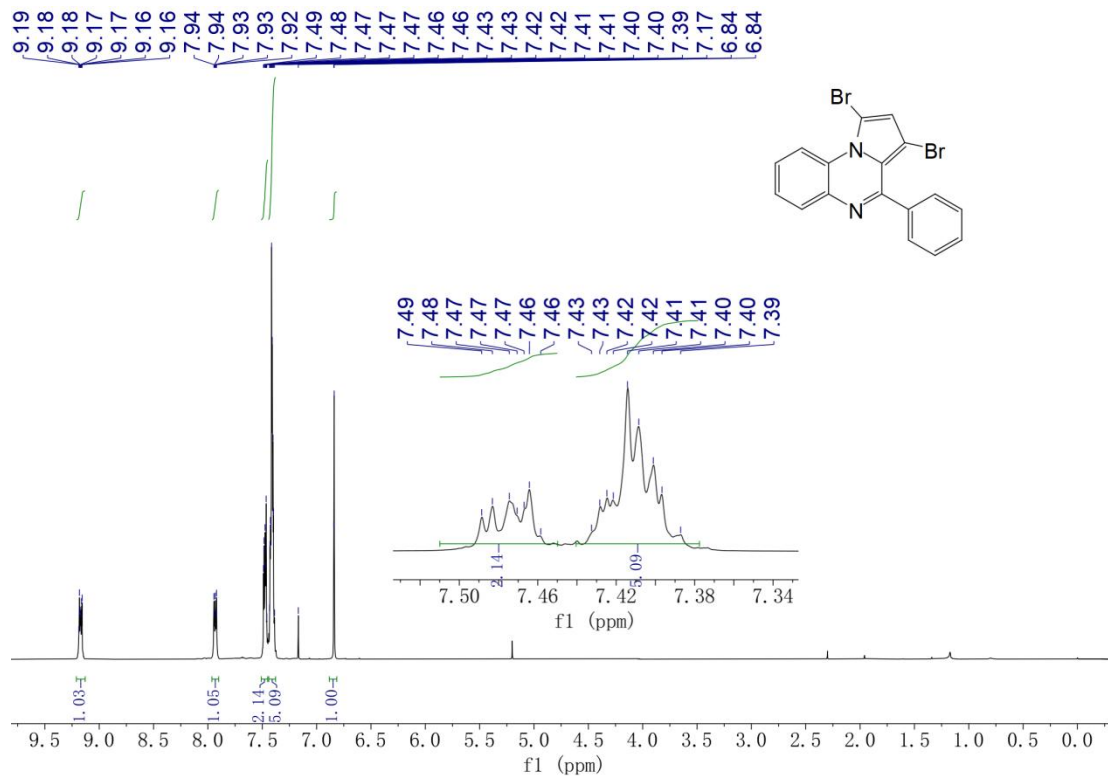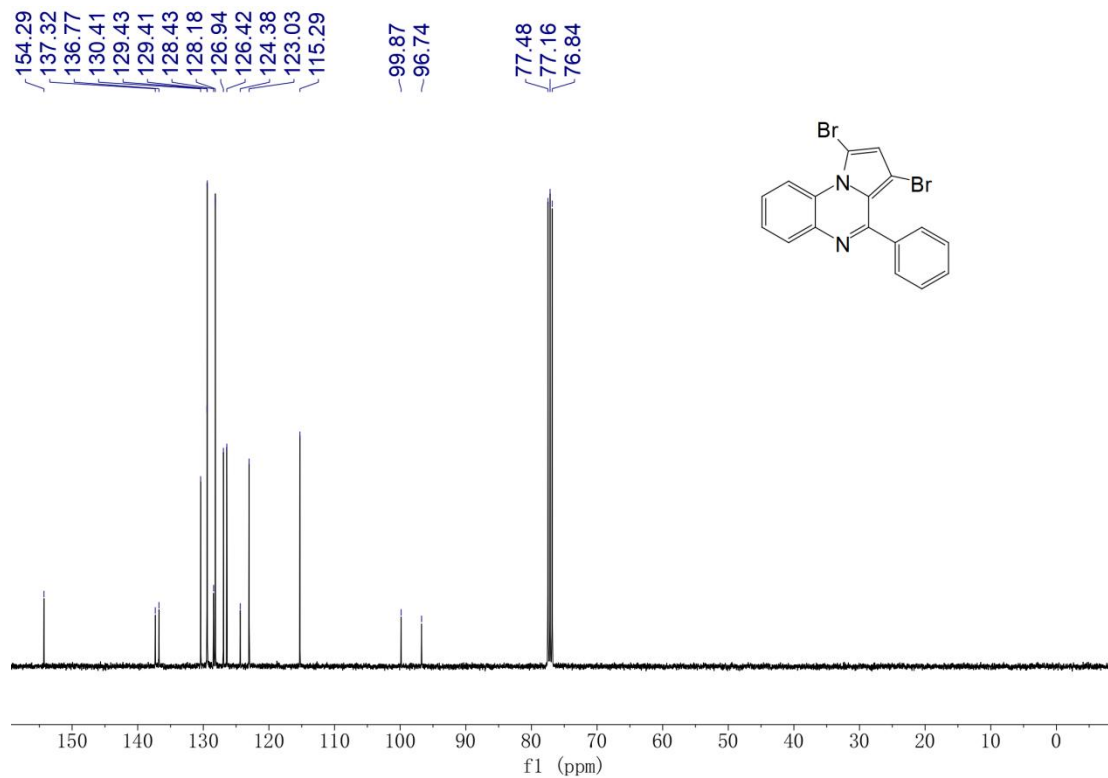



# 1,3-dibromo-4-(p-tolyl)pyrrolo[1,2-a]quinoxaline [4c]

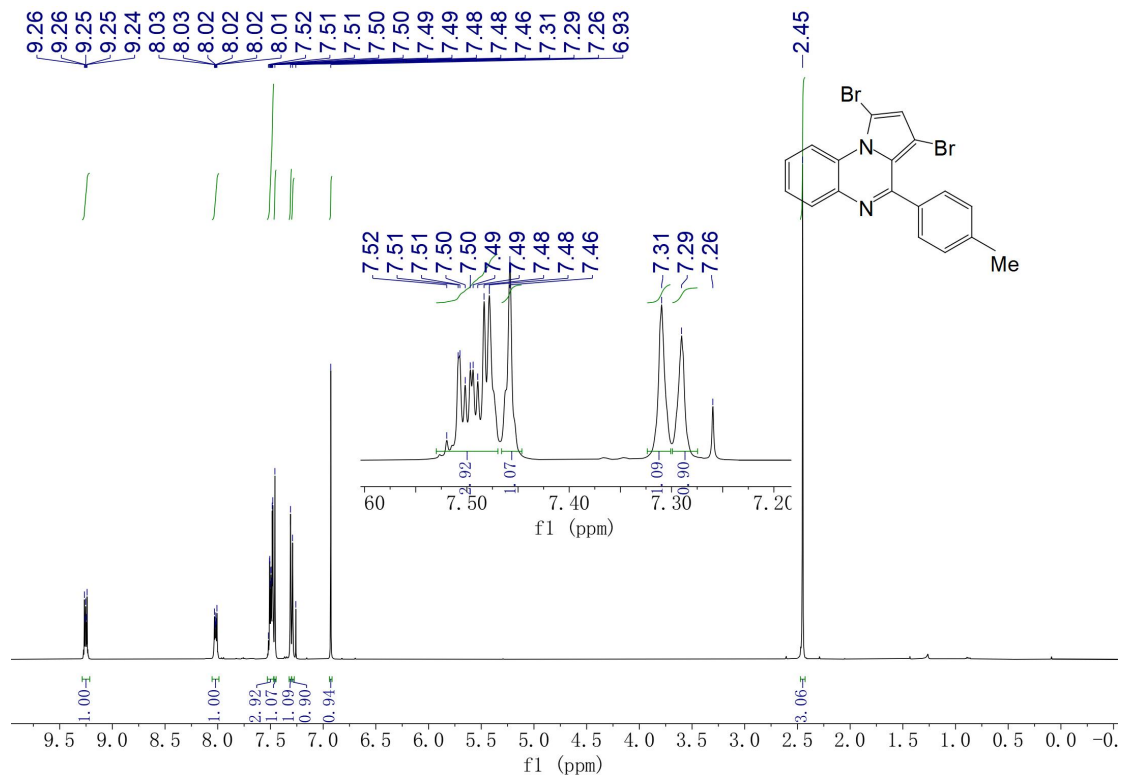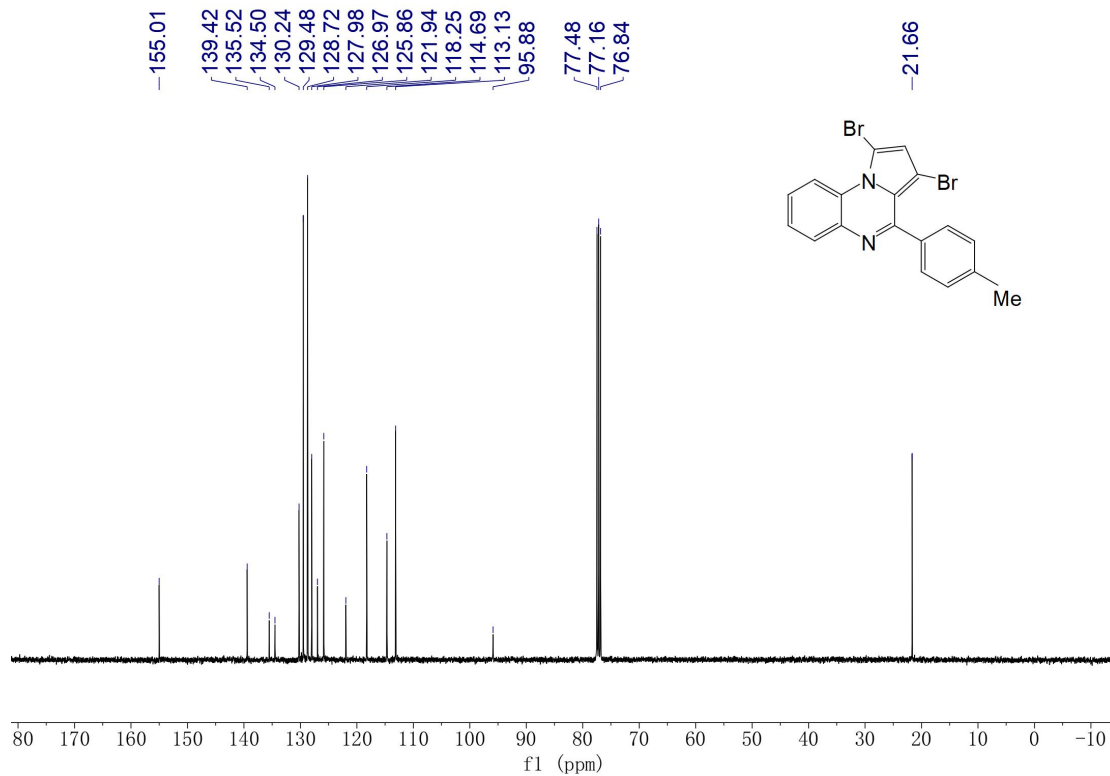

# 1,3-dibromo-4-(4-methoxyphenyl)pyrrolo[1,2-a]quinoxaline [4d]

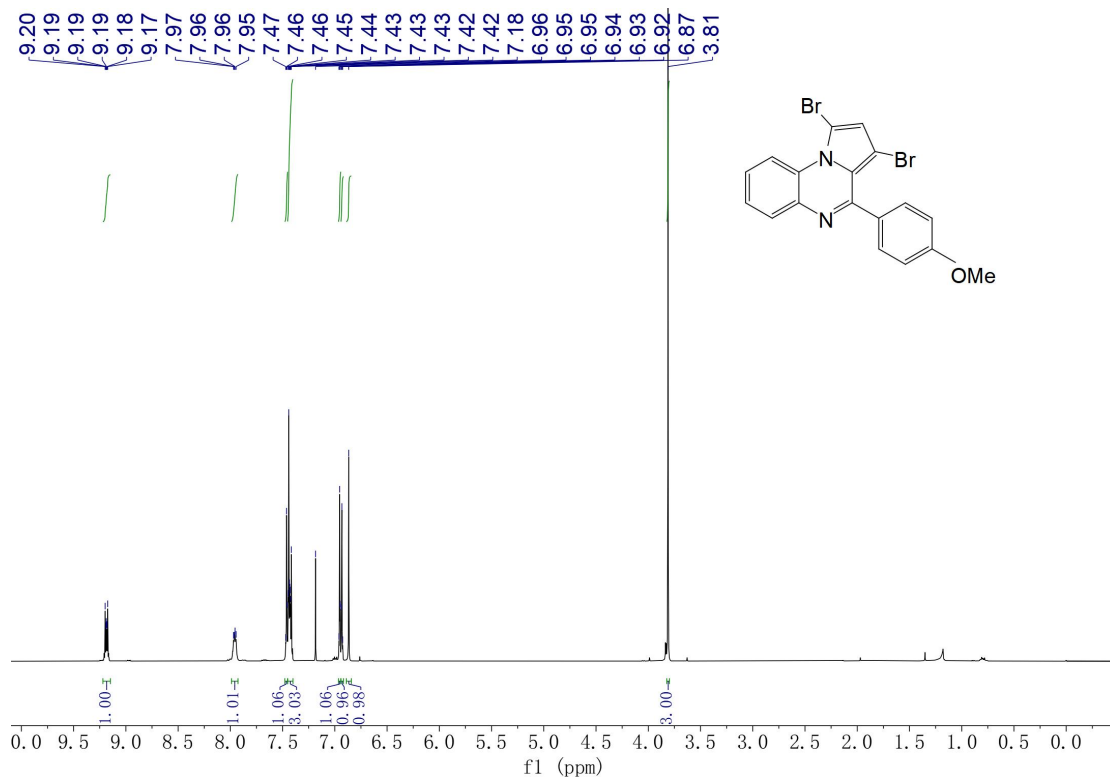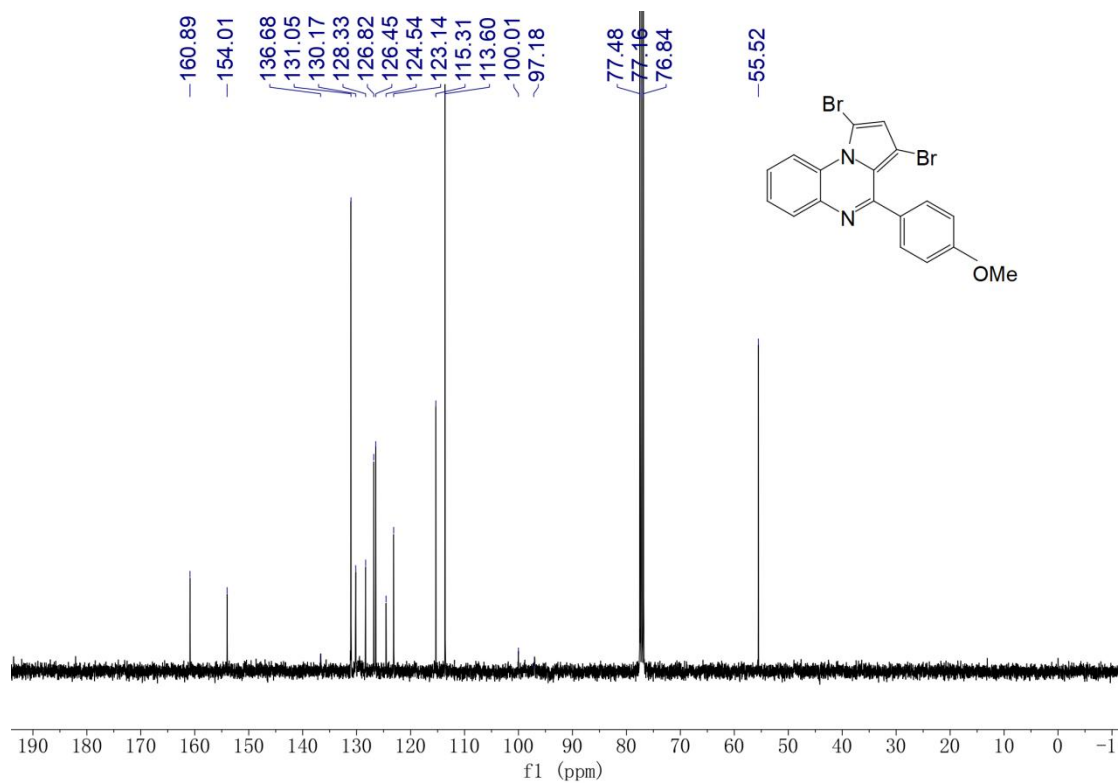

# 1,3-dibromo-4-(4-chlorophenyl)pyrrolo[1,2-a]quinoxaline [4e]

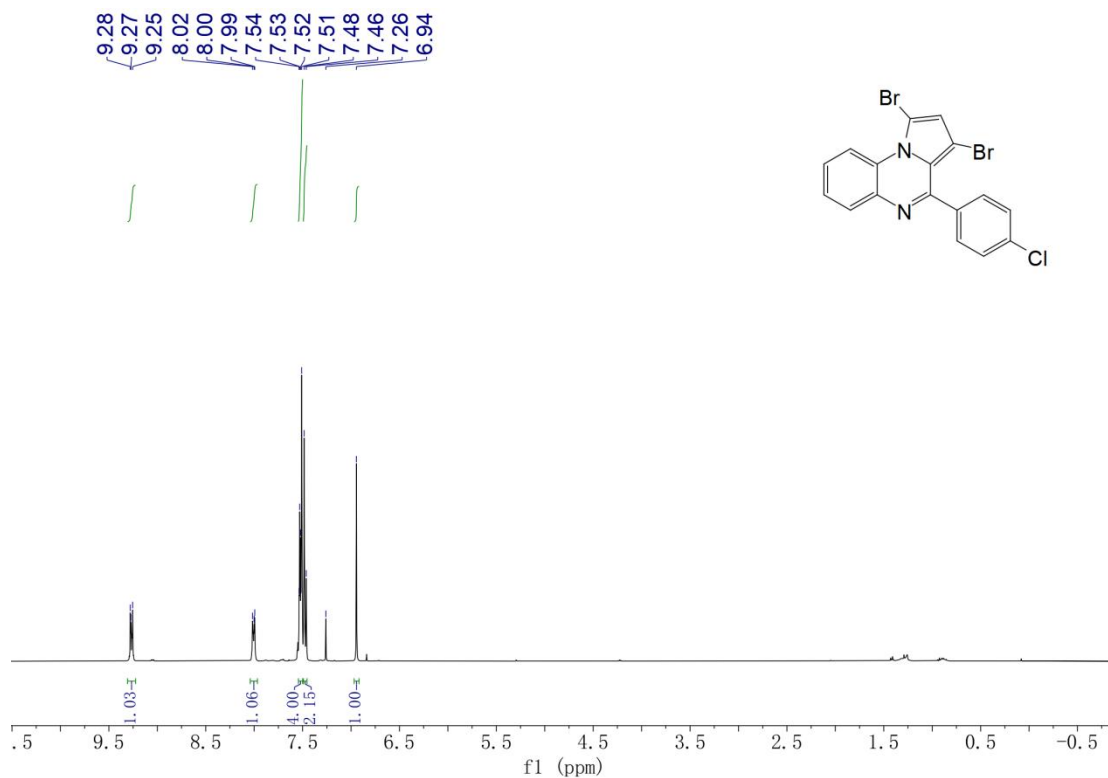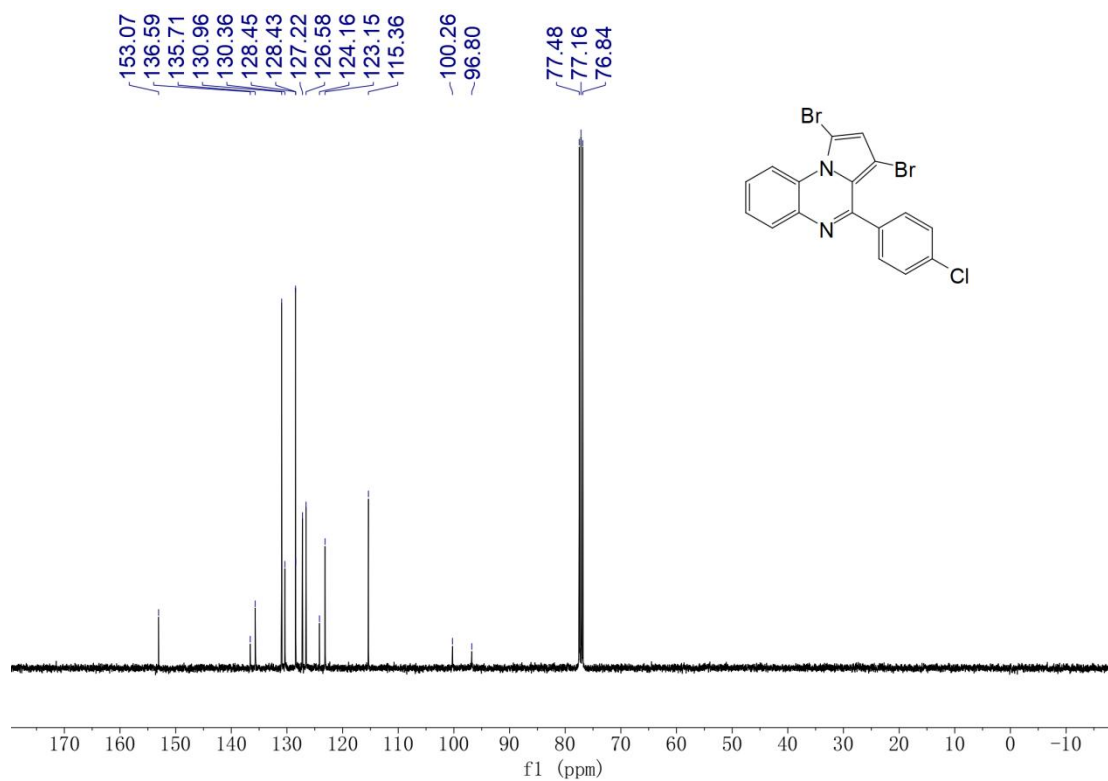

# 1,3-dibromo-4-(4-bromophenyl)pyrrolo[1,2-a]quinoxaline [4f]

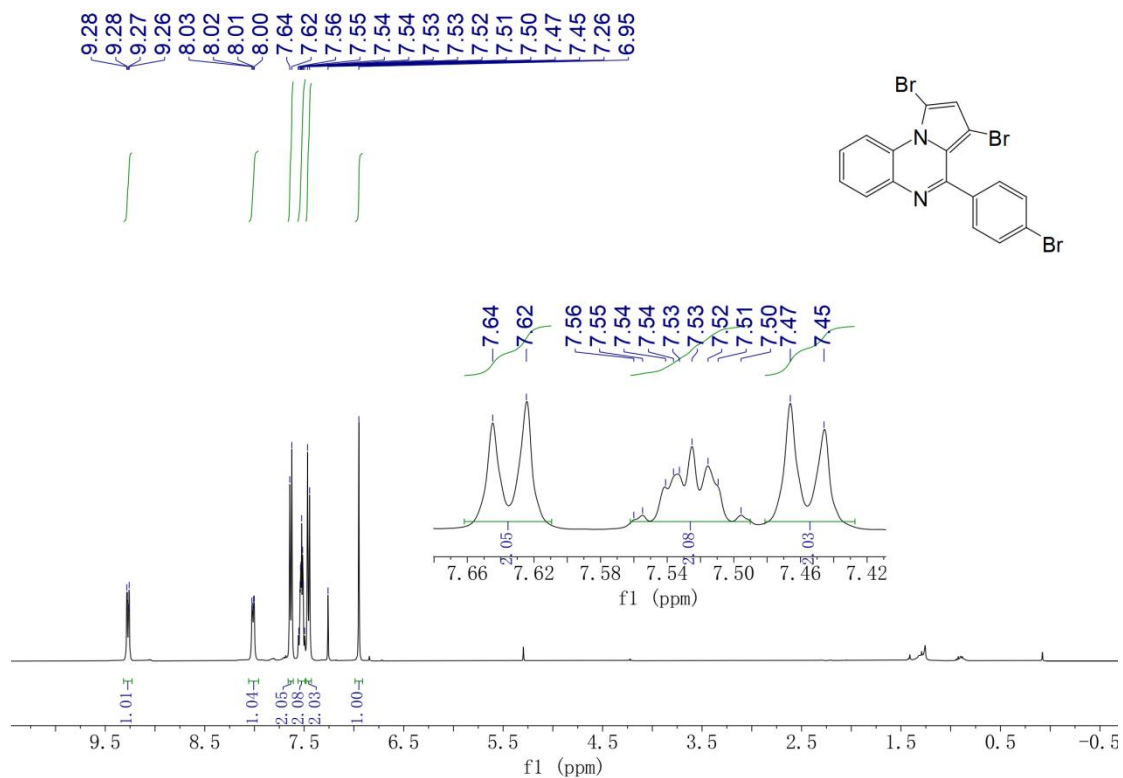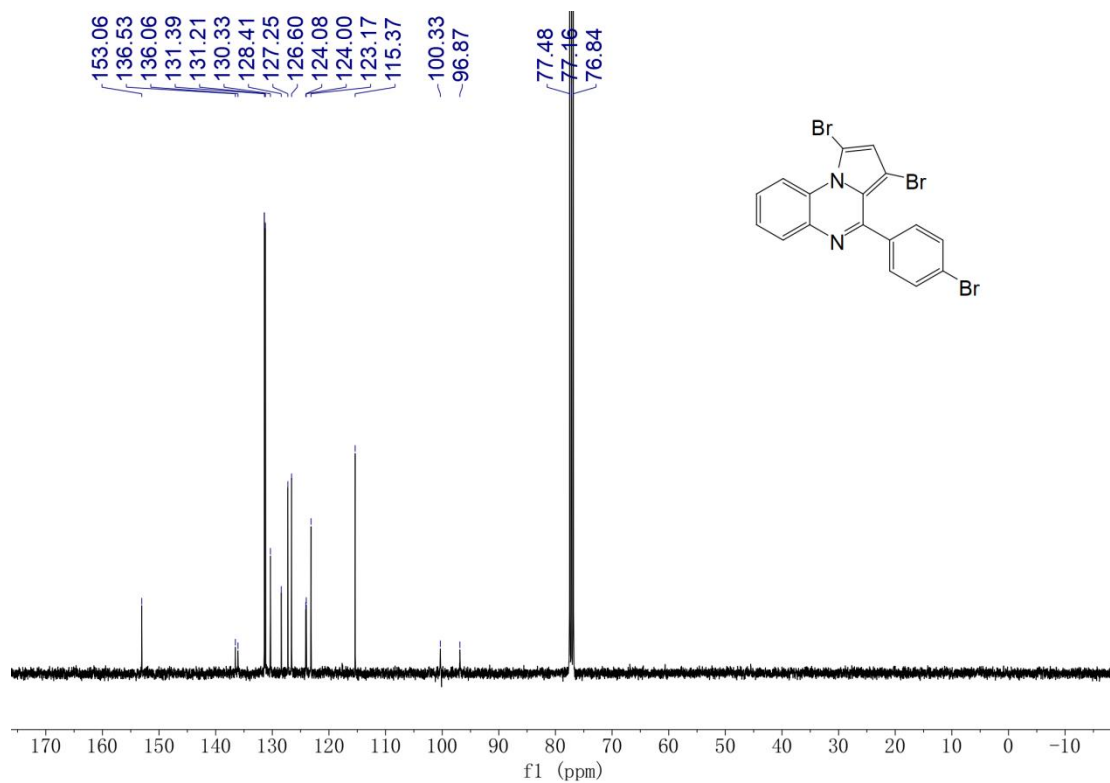

# 1,3-dibromo-4-(4-fluorophenyl)pyrrolo[1,2-a]quinoxaline [4g]

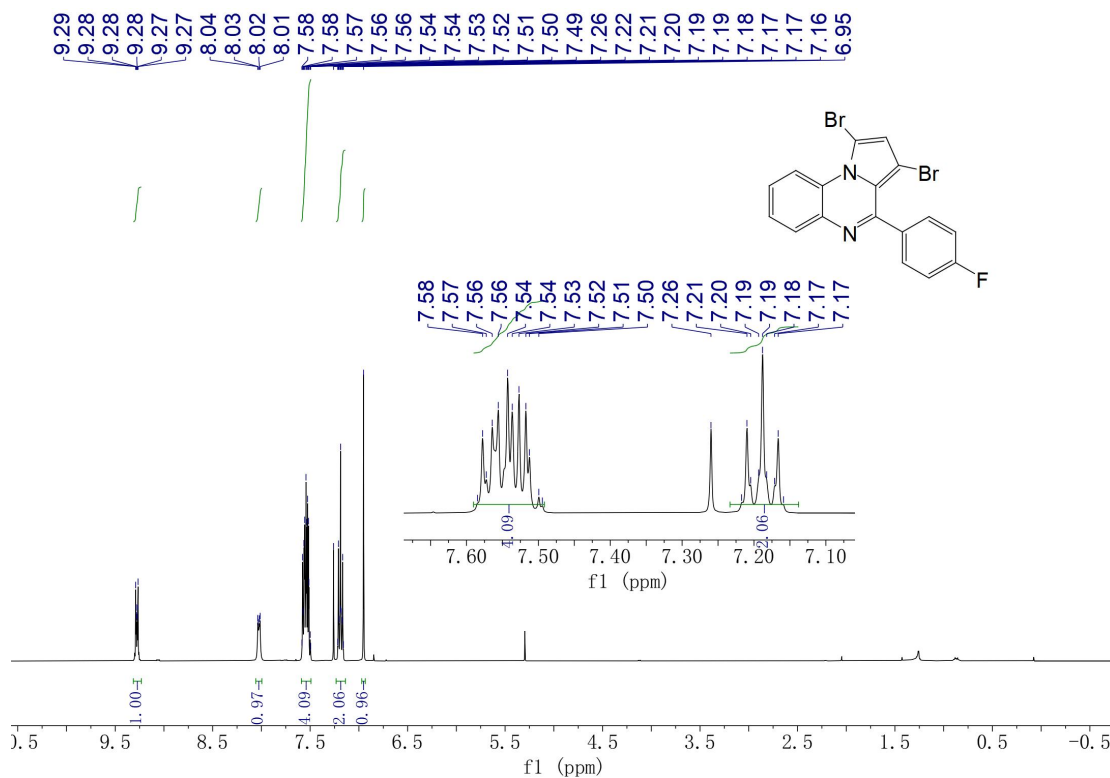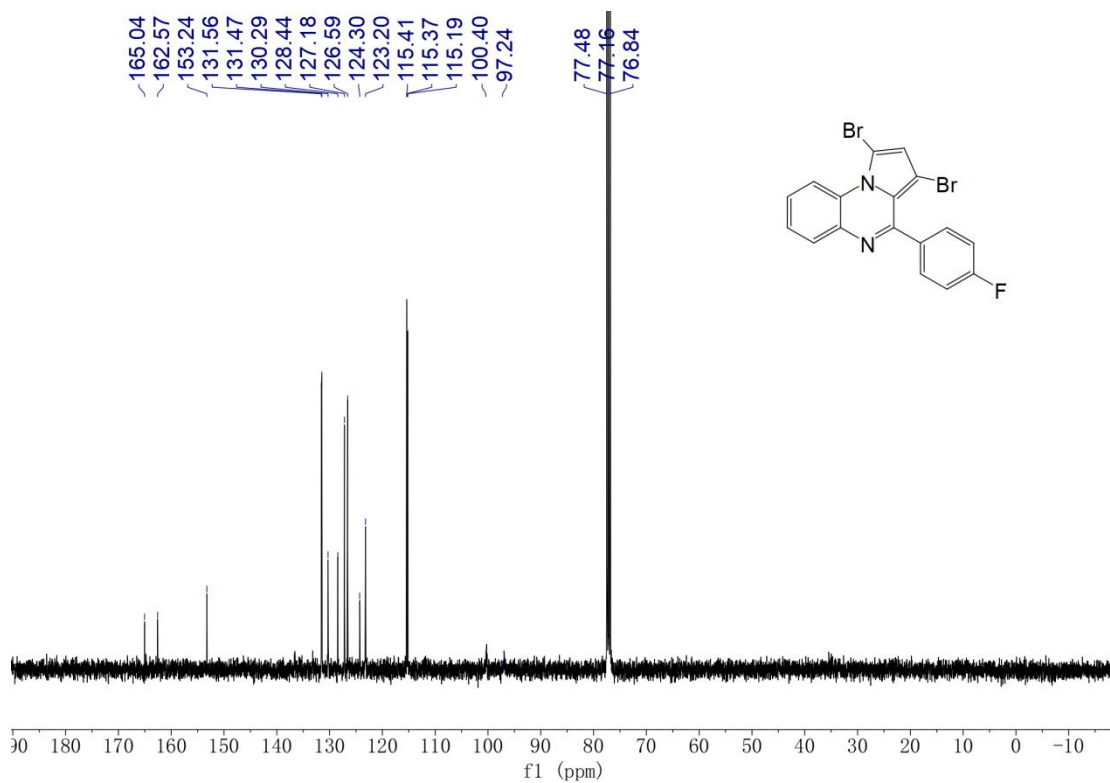

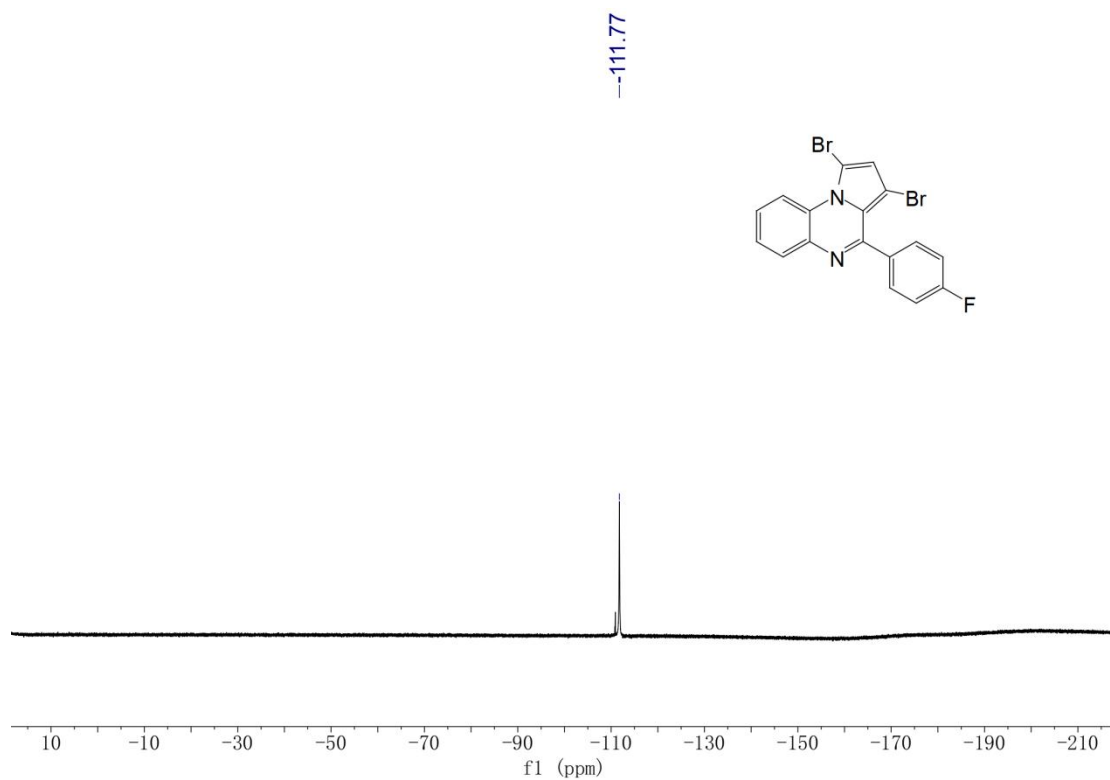

**1,3-dibromo-4-(4-nitrophenyl)pyrrolo[1,2-a]quinoxaline [4h]**

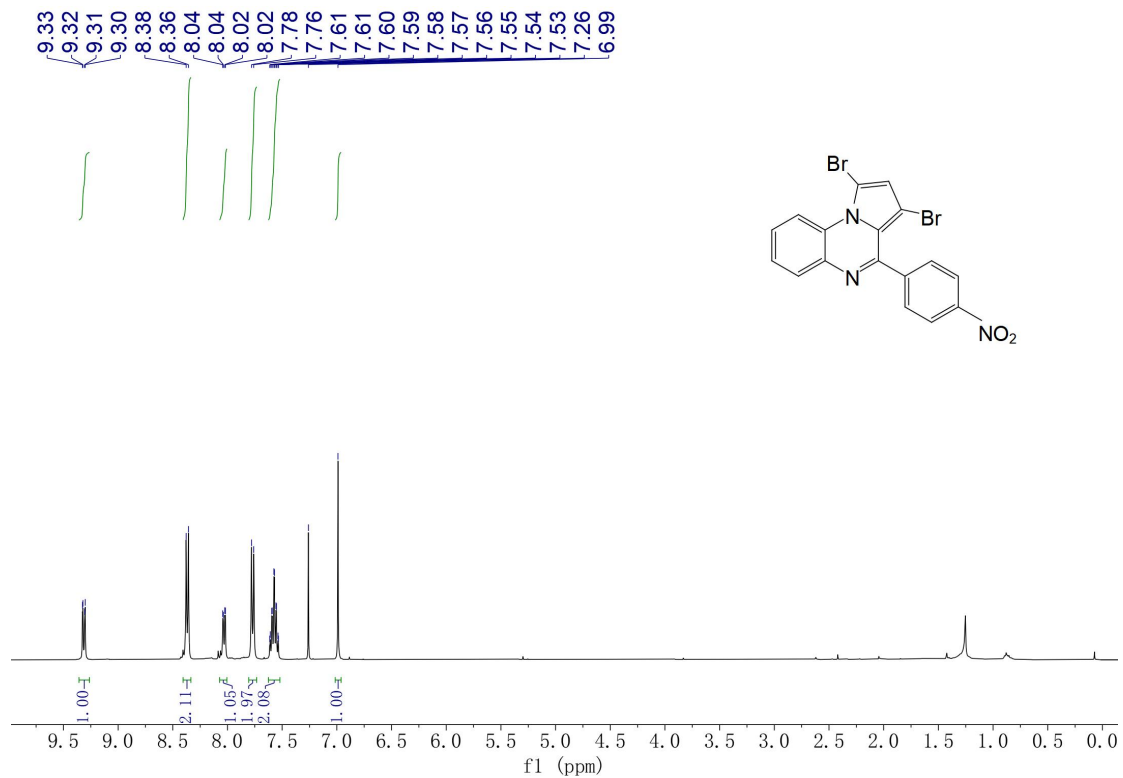

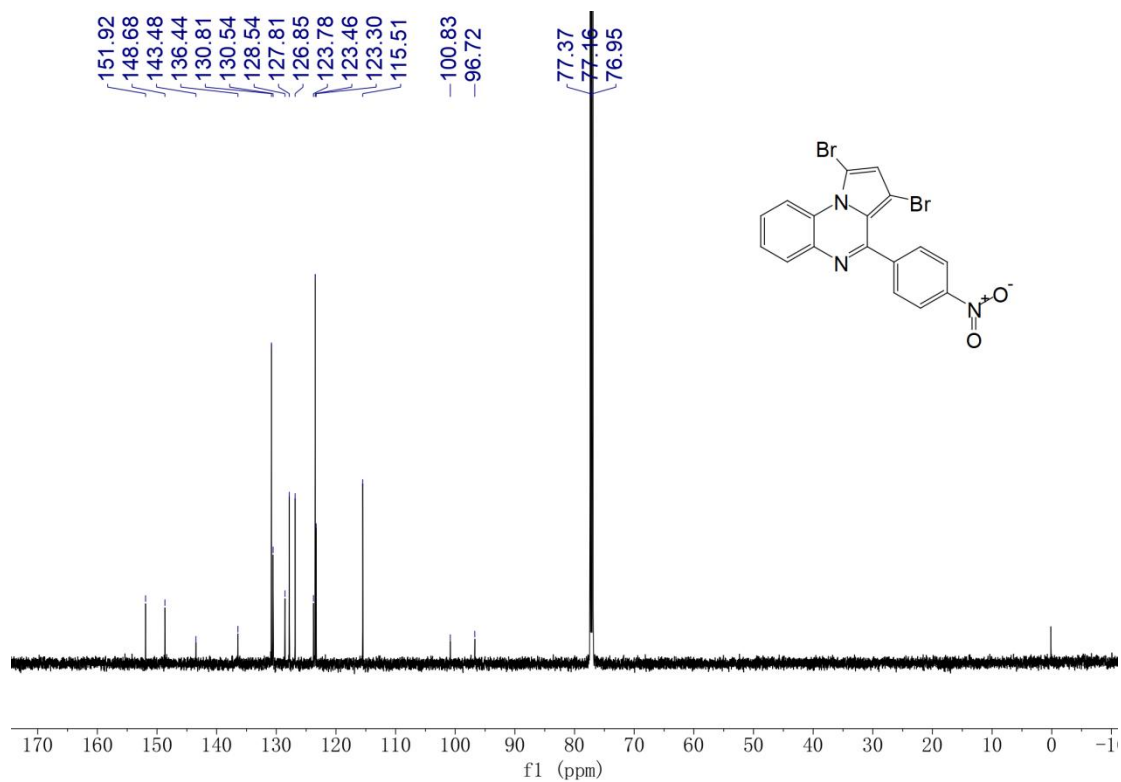

### 1,3-dibromo-4-(2,4-dichlorophenyl)pyrrolo[1,2-a]quinoxaline [4i]

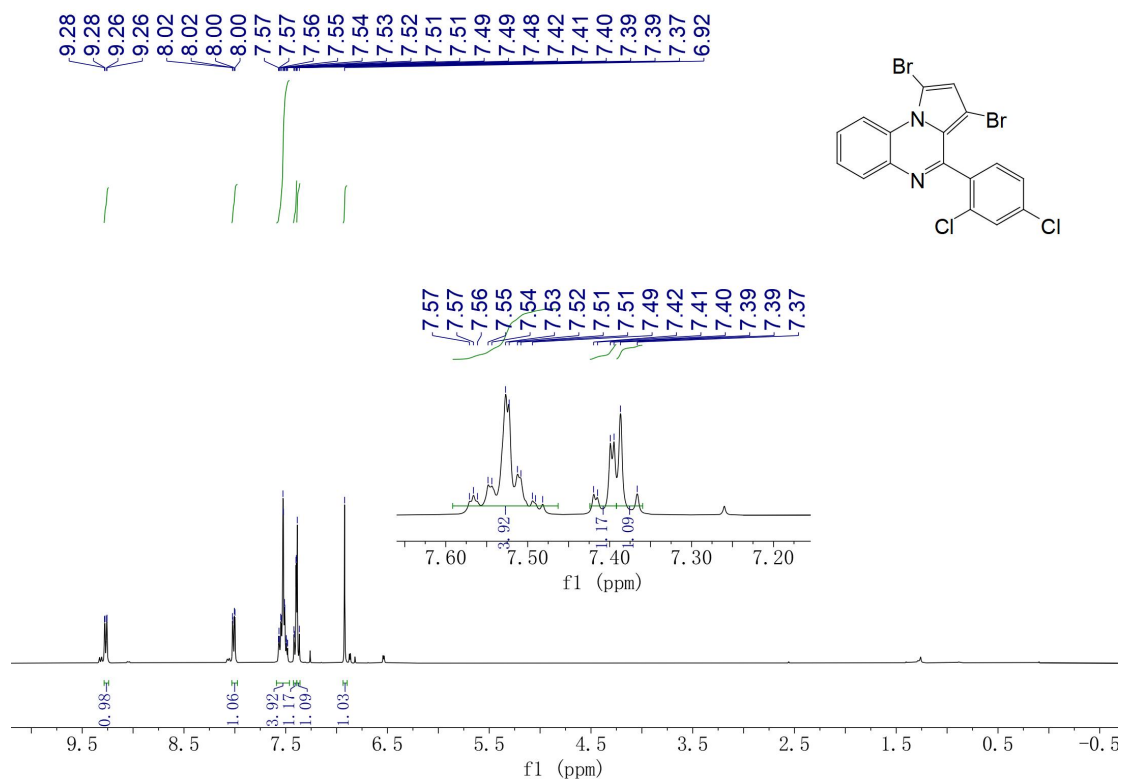

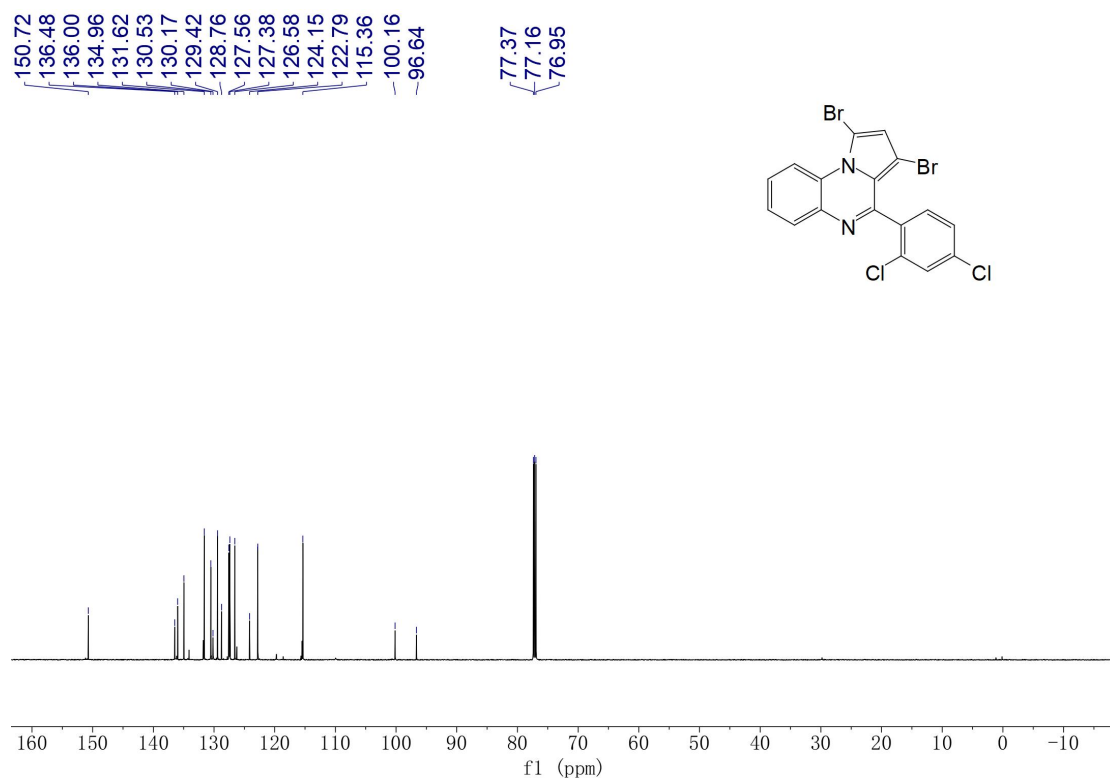

**1,3-dibromo-7-methylpyrrolo[1,2-a]quinoxaline [4j]**

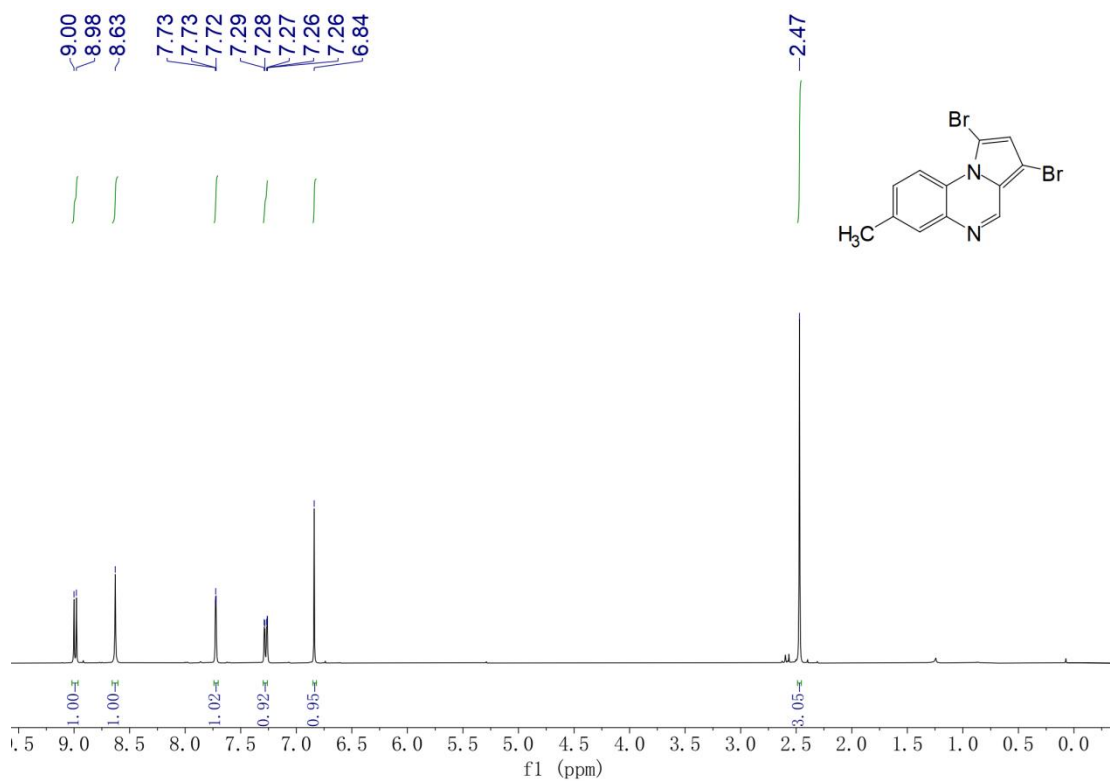



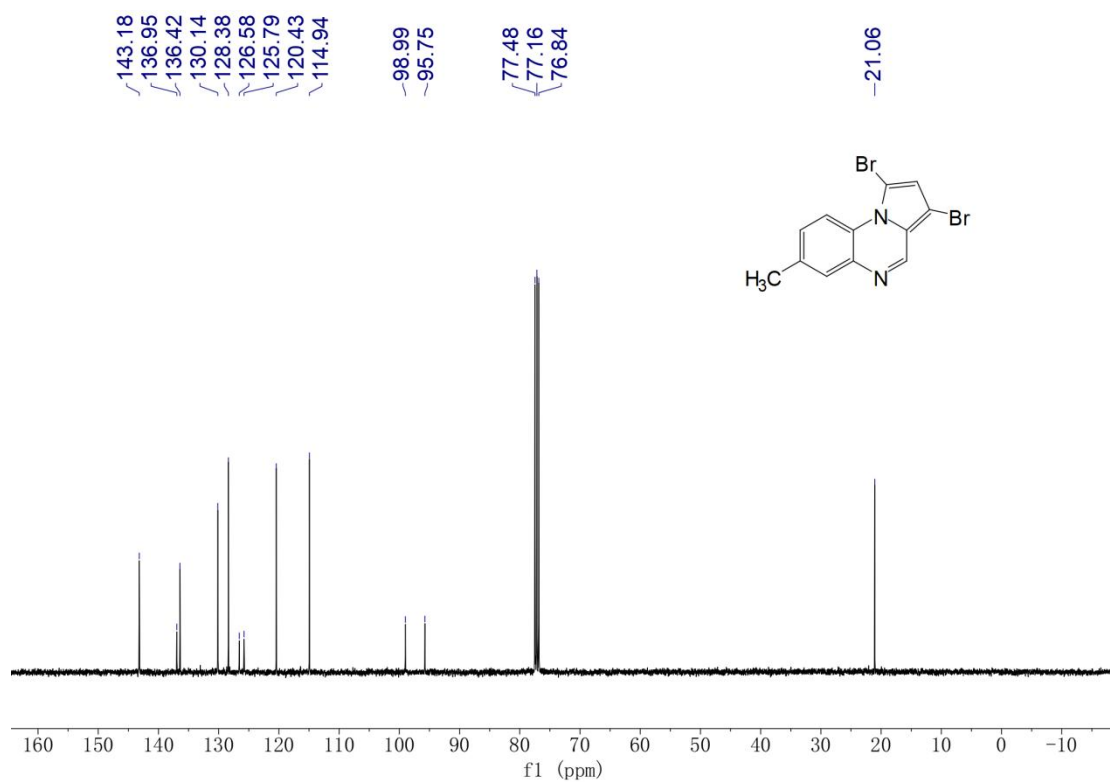

**1,3-dibromo-7-chloropyrrolo[1,2-a]quinoxaline [4k]**

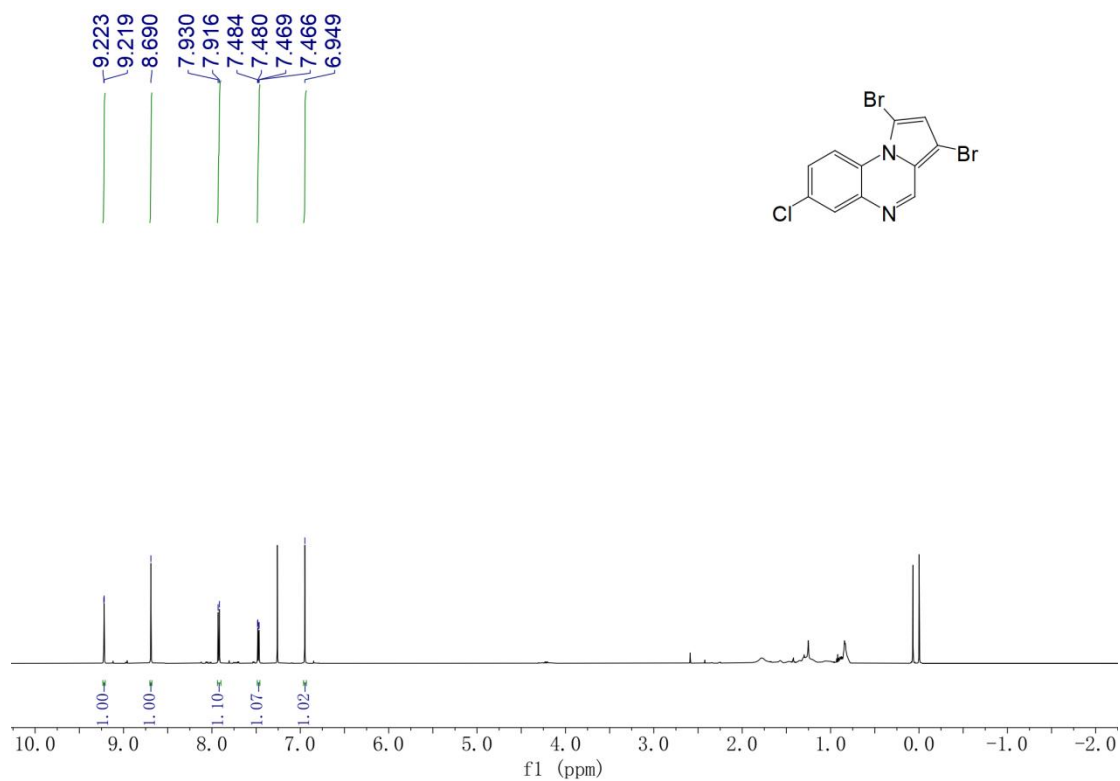

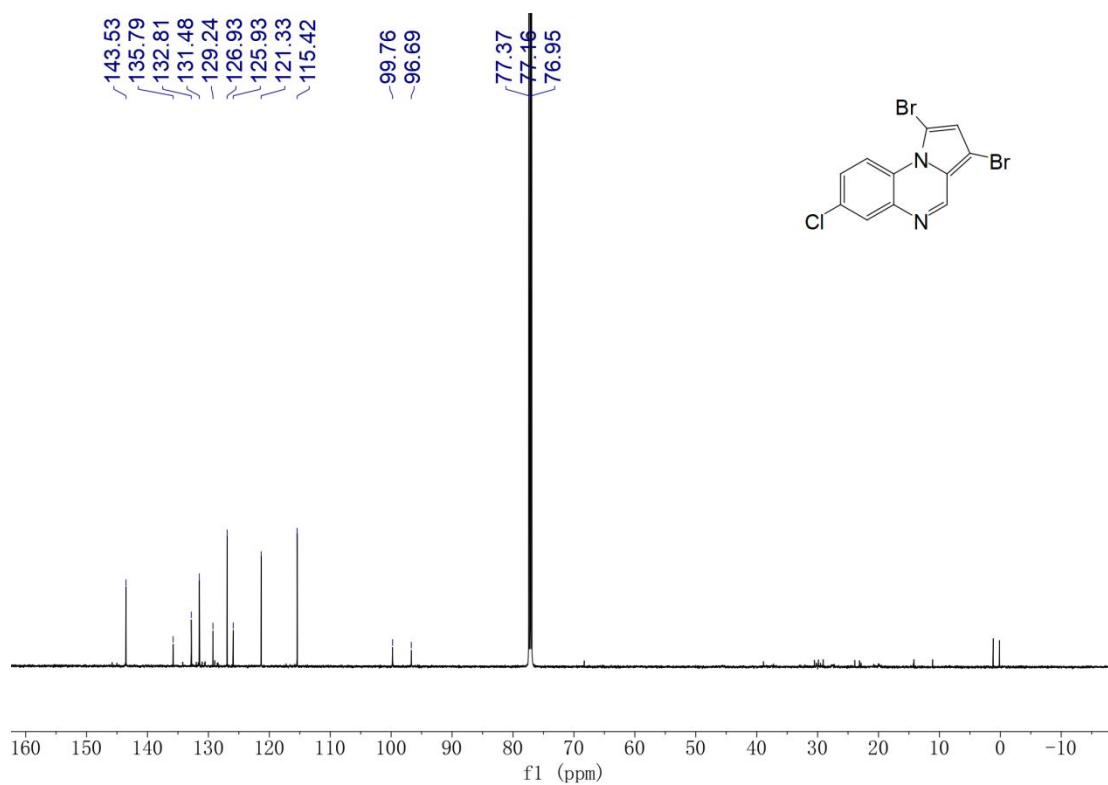

**1,3-dibromo-8-methylpyrrolo[1,2-a]quinoxaline [4]**

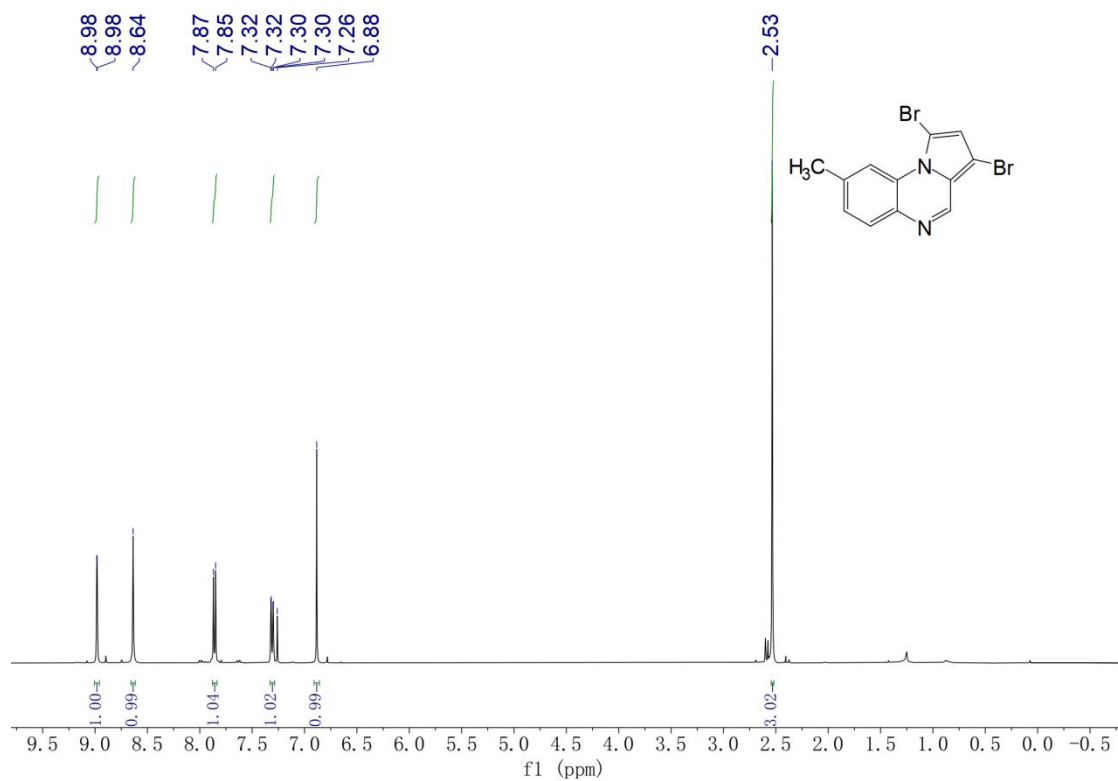

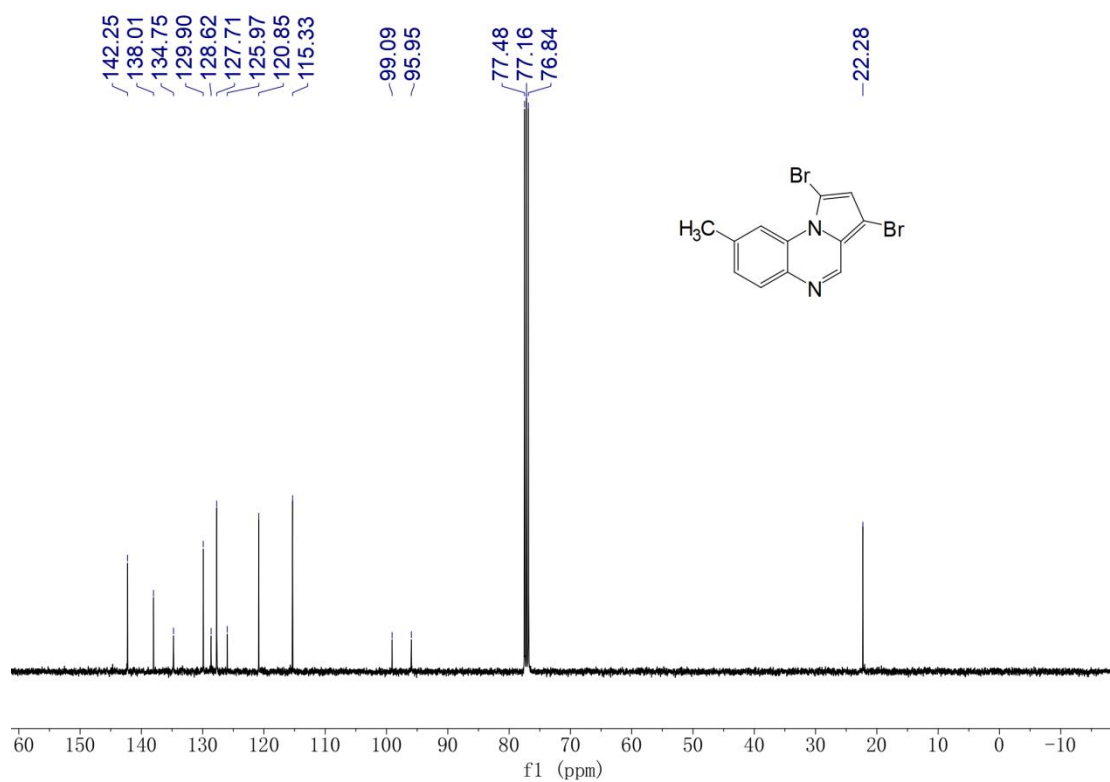

**1,3-dibromo-8-chloropyrrolo[1,2-a]quinoxaline [4m]**

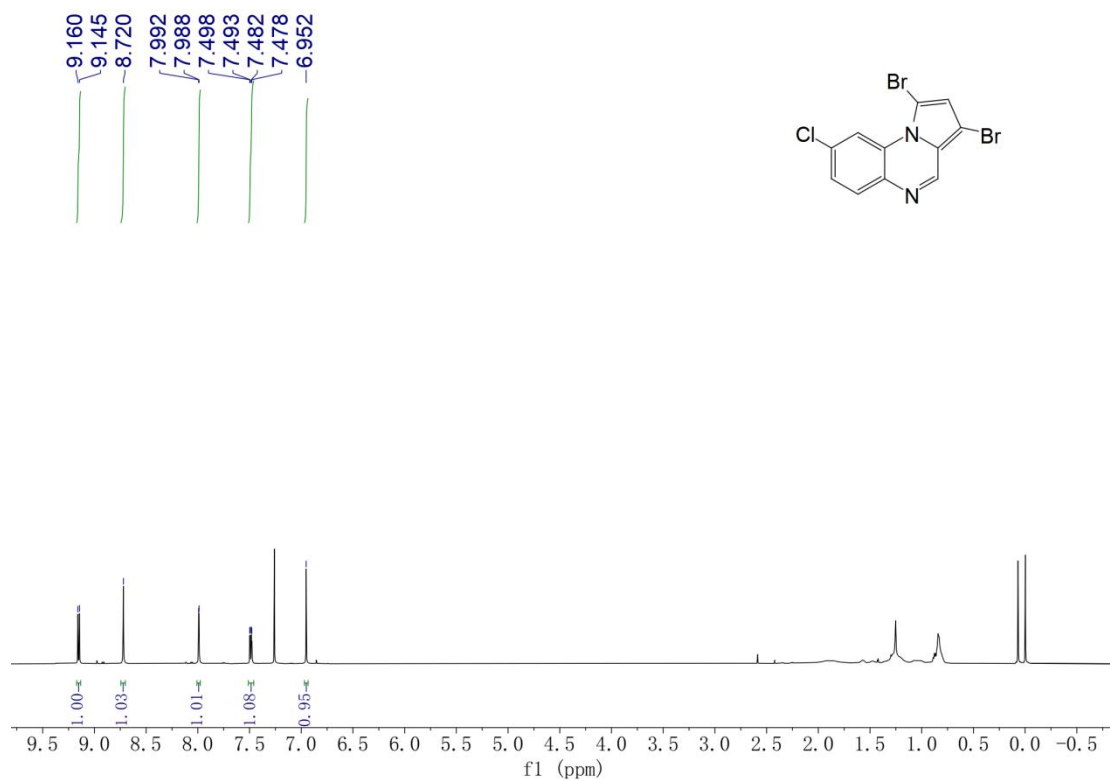

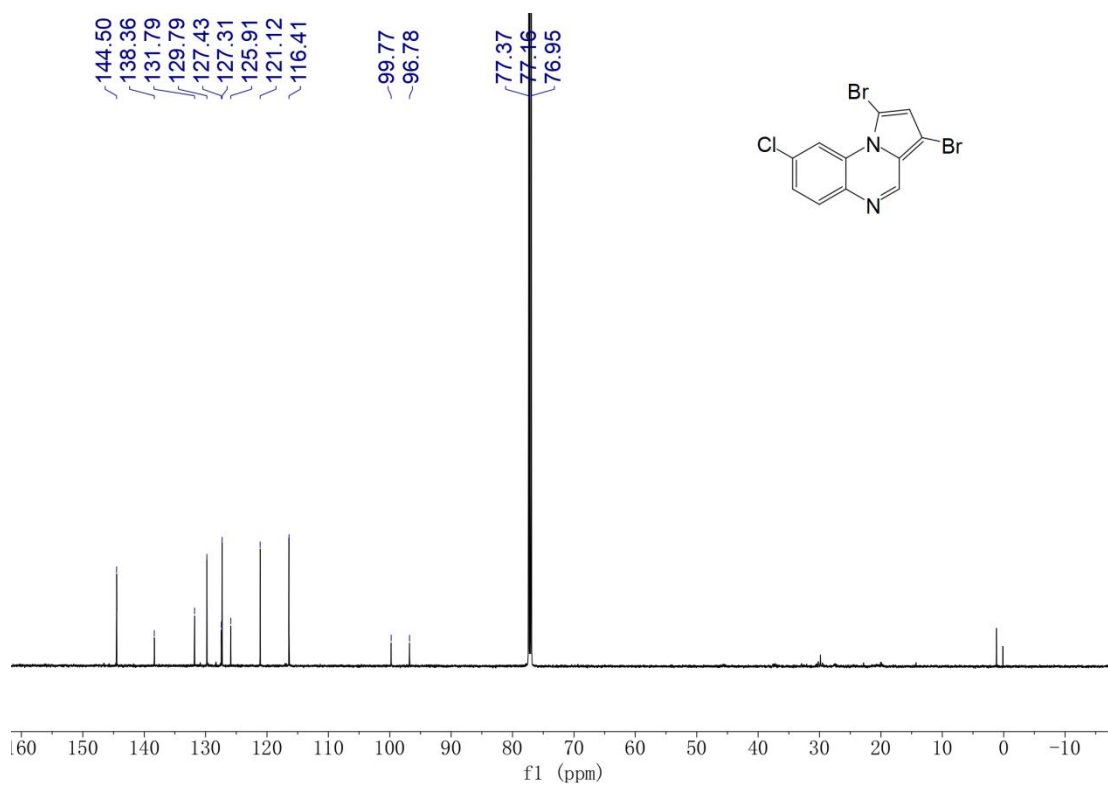

### 1,3-dibromo-8-fluoropyrrolo[1,2-a]quinoxaline [4n]

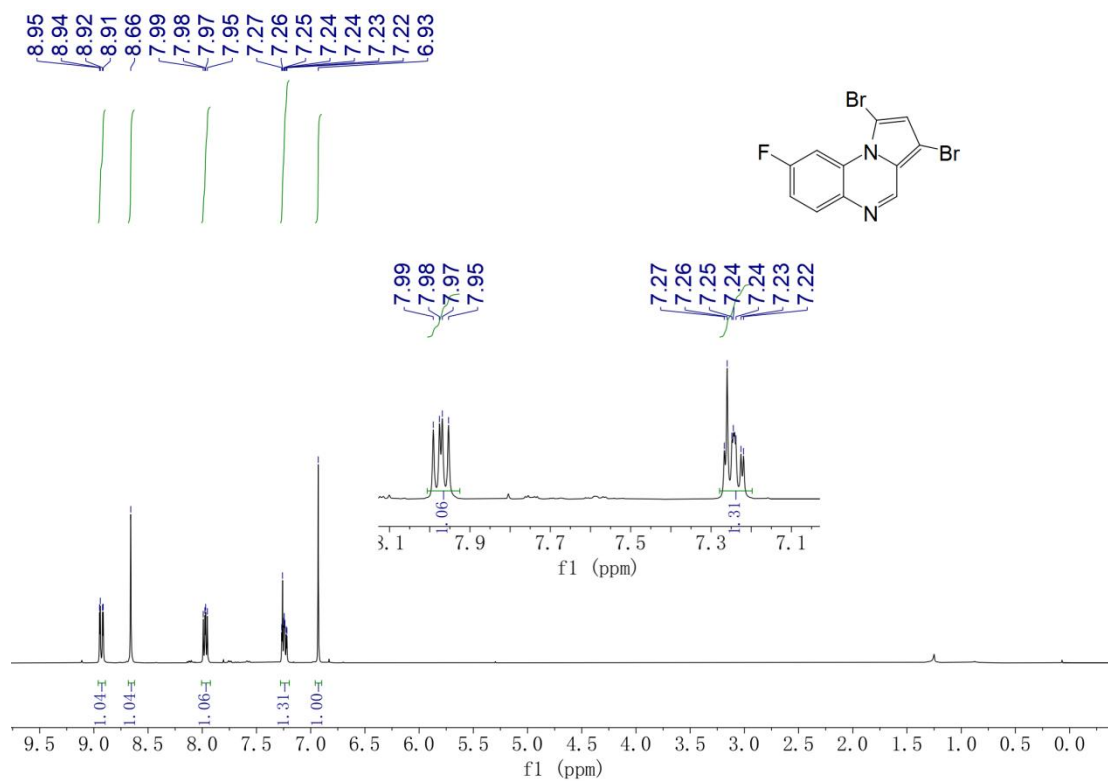

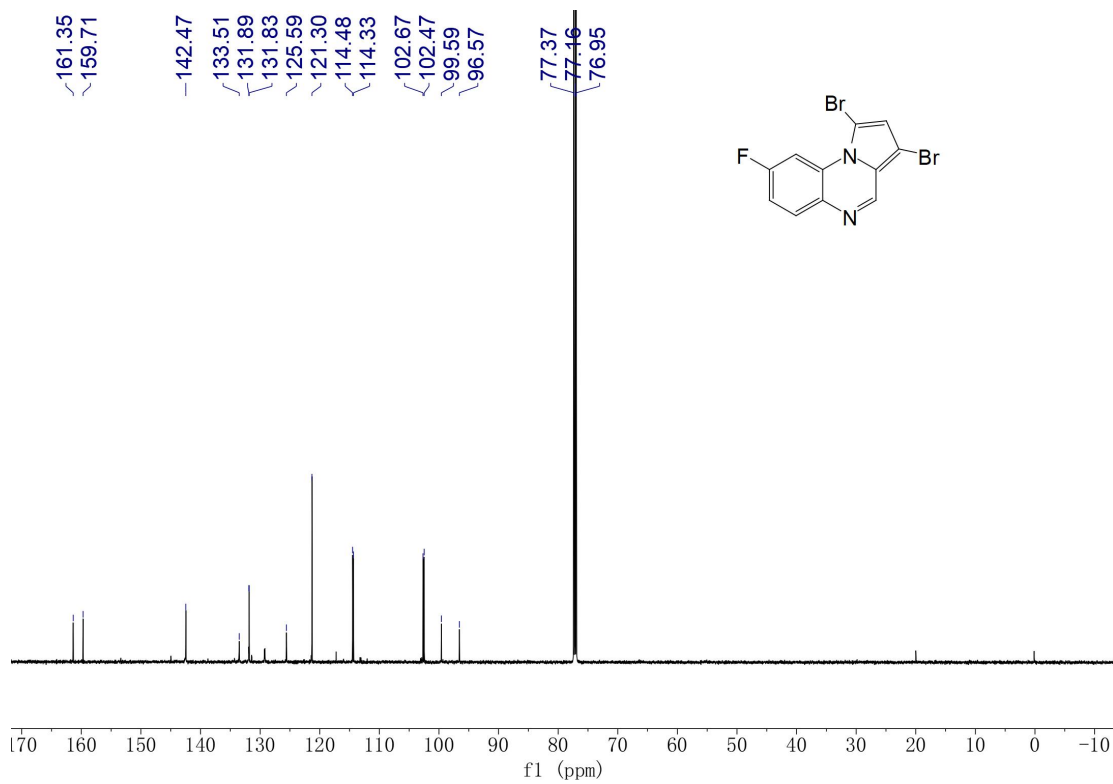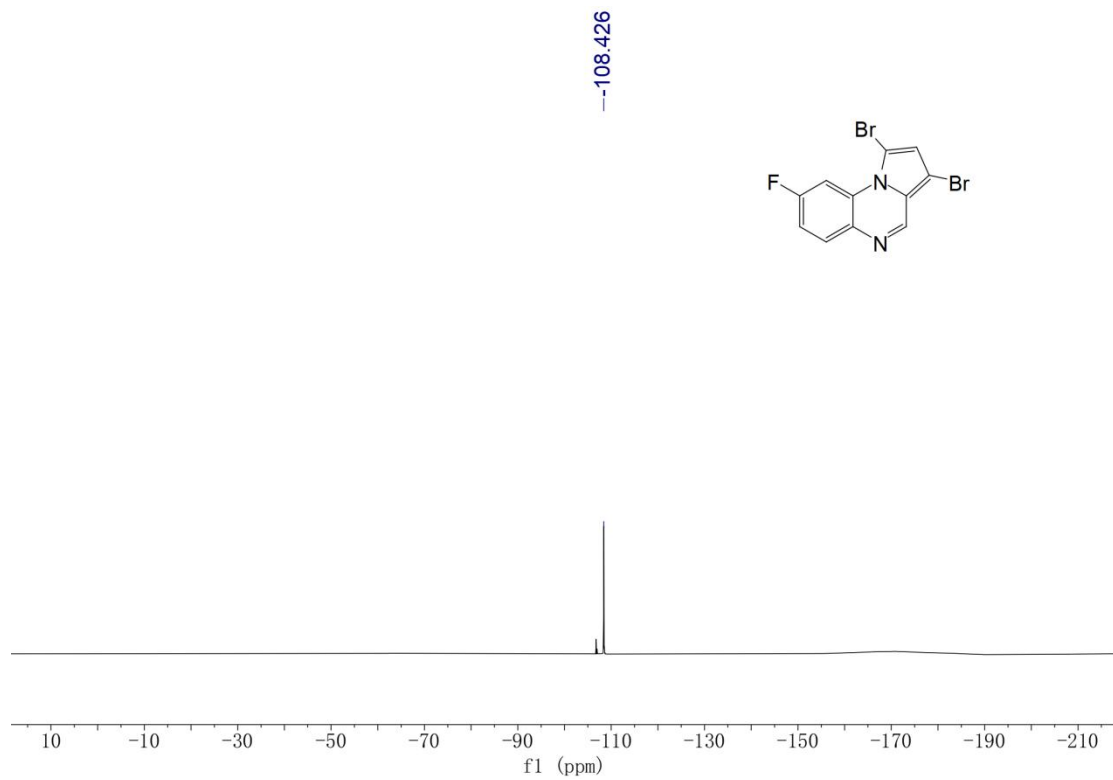

# 1,3-dibromo-4-(4-methoxyphenyl)-7-methylpyrrolo[1,2-a]quinoxaline [4o]

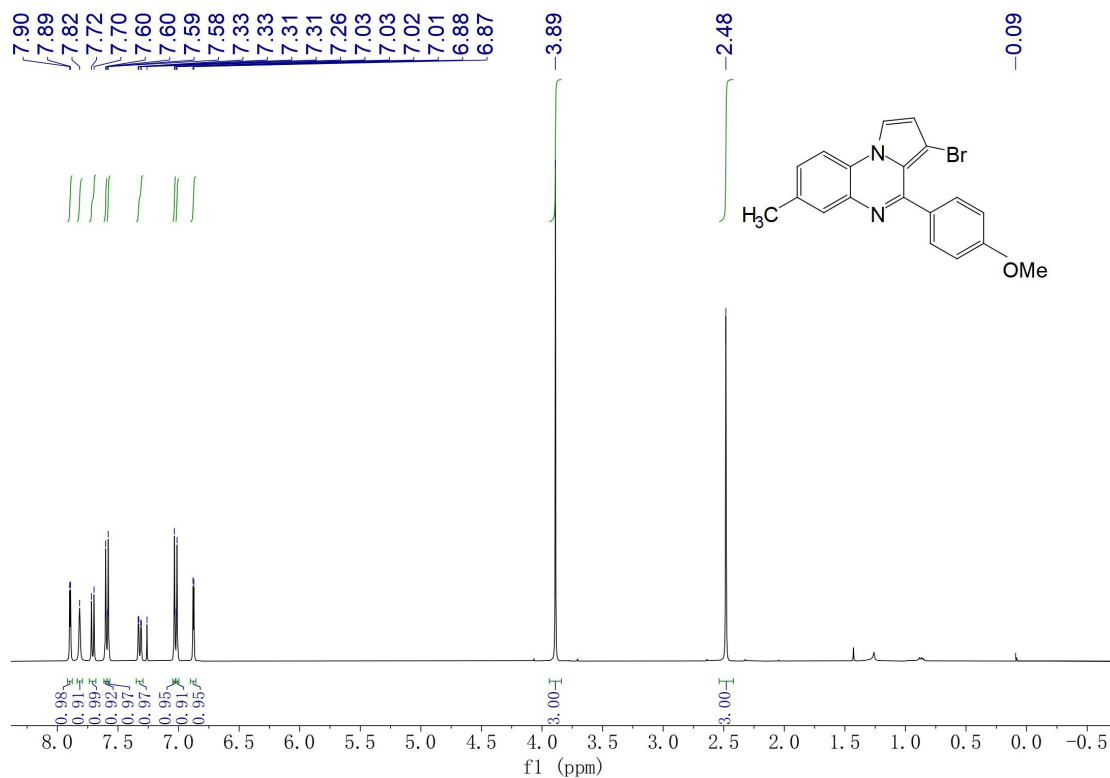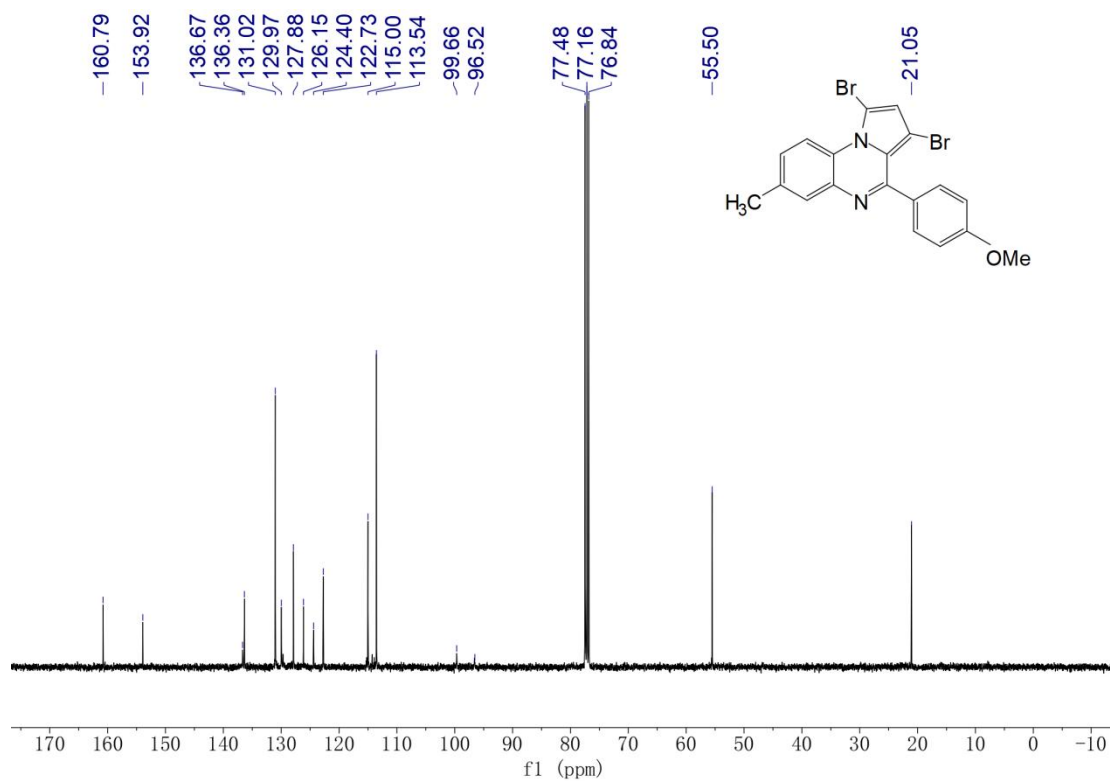

# 1,3-dibromo-4-(4-bromophenyl)-7-methylpyrrolo[1,2-a]quinoxaline [4q]

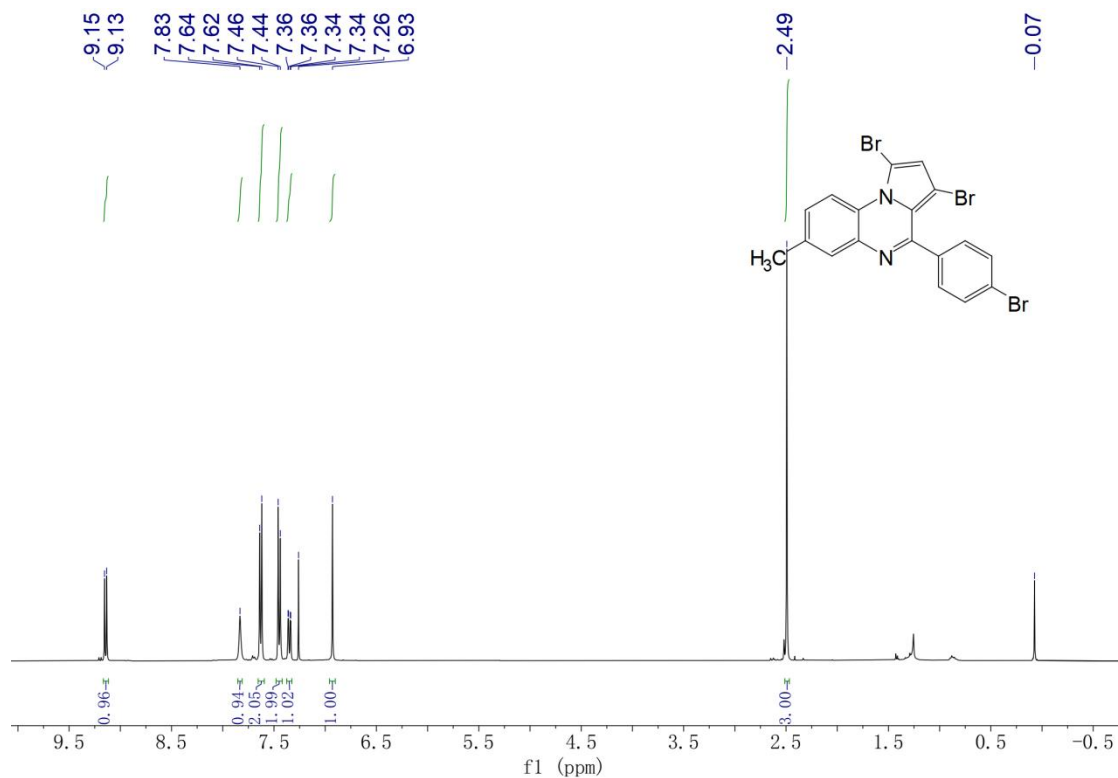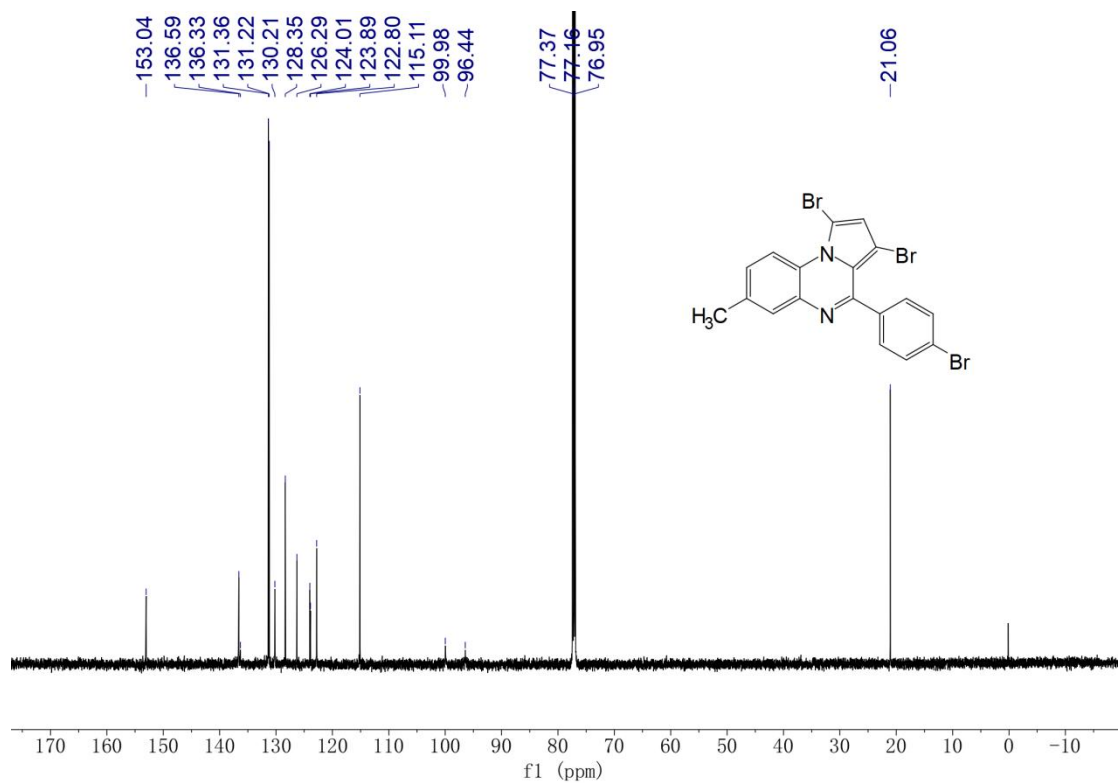

### 3-phenylpyrrolo[1,2-a]quinoxaline [3aa]

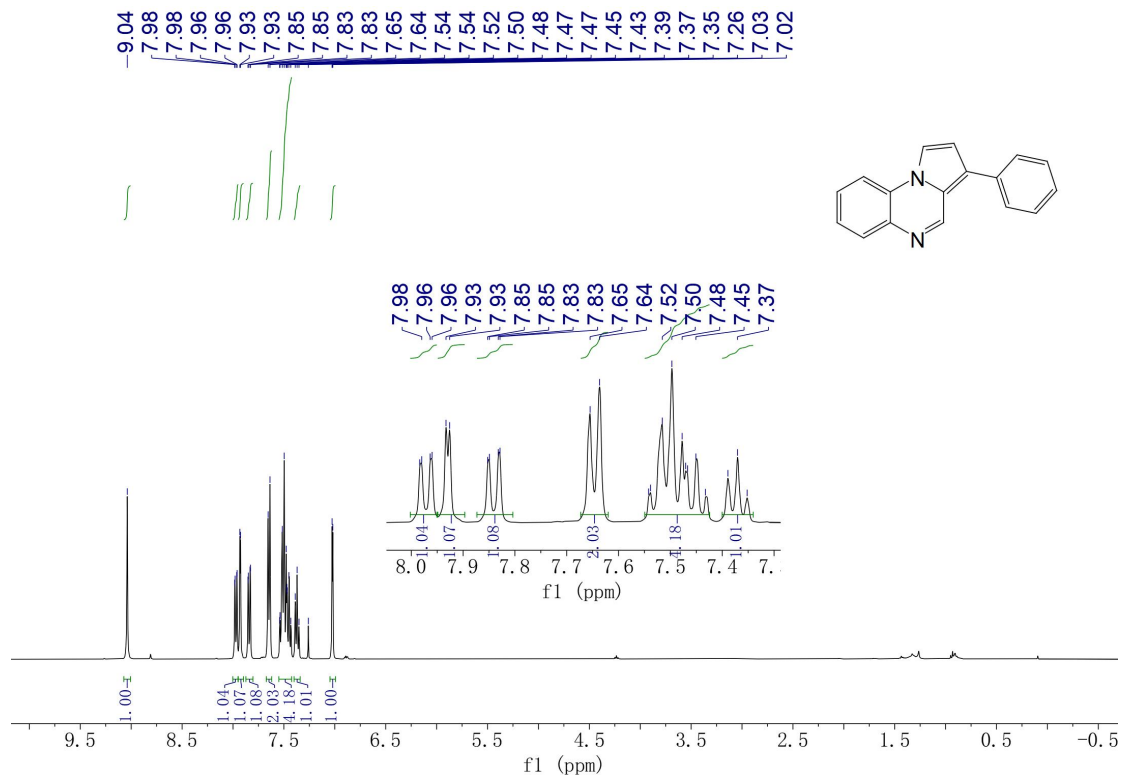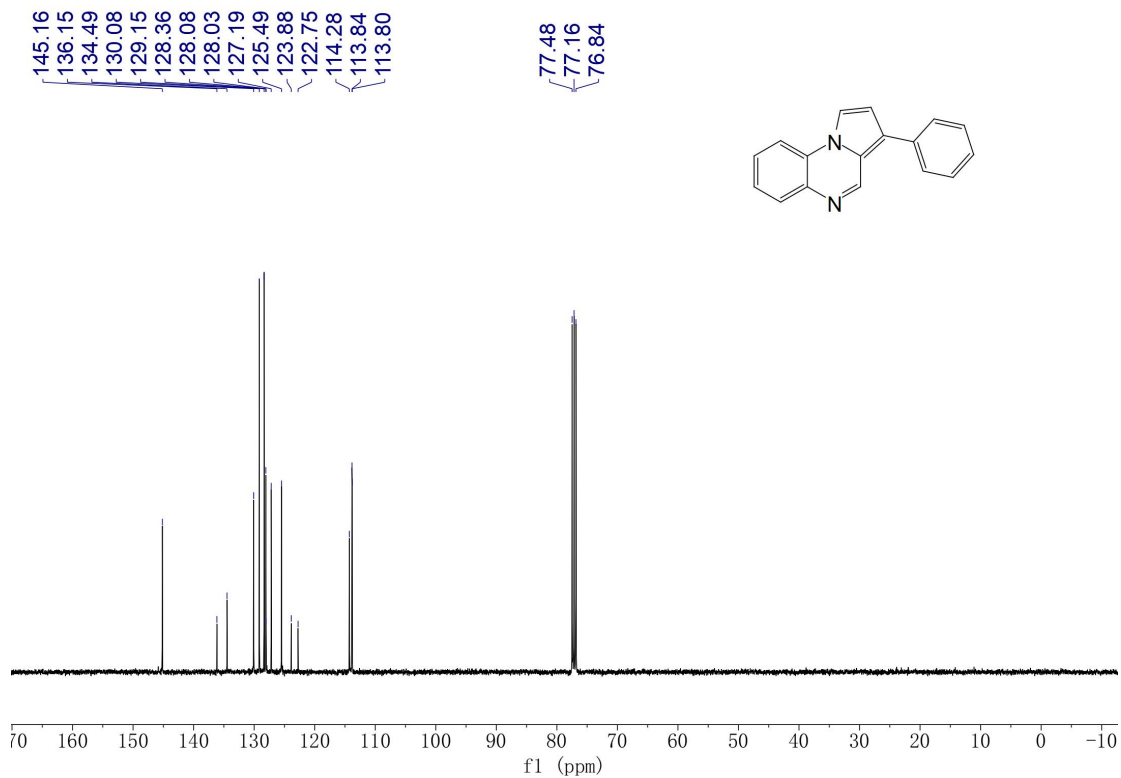



### 3-bromo-1-(p-tolyl)pyrrolo[1,2-a]quinoxaline [3ab]

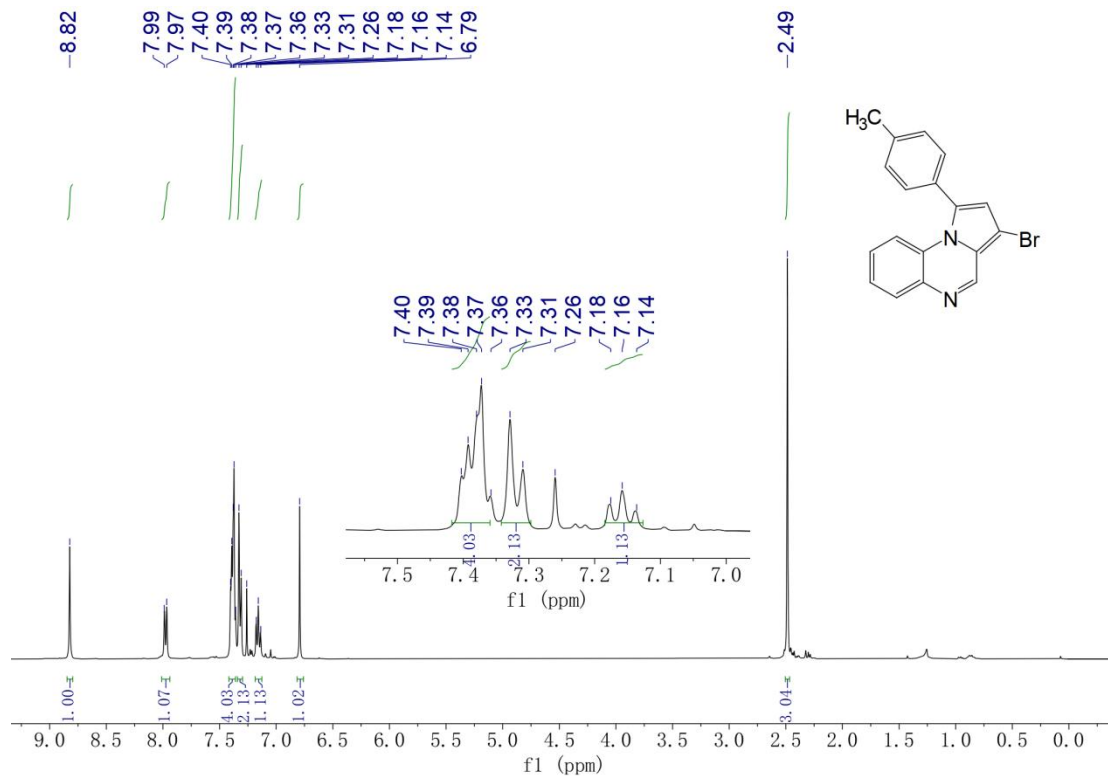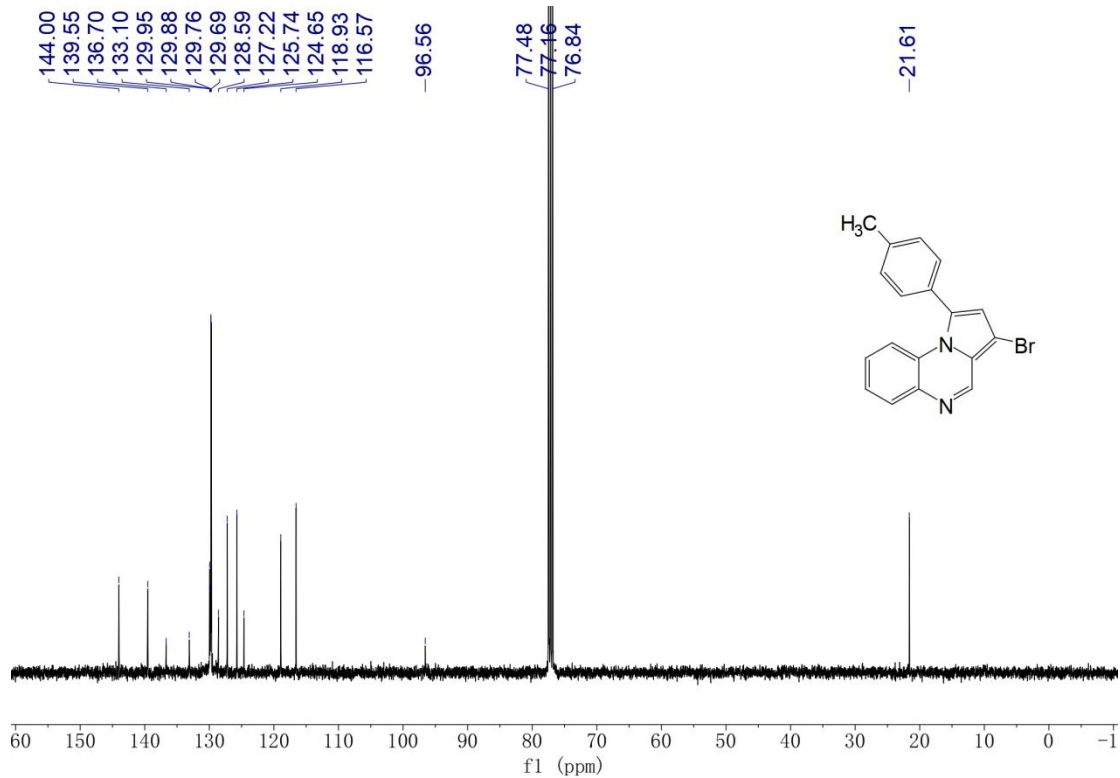

### 3-bromo-1-chloropyrrolo[1,2-a]quinoxaline [3ac]

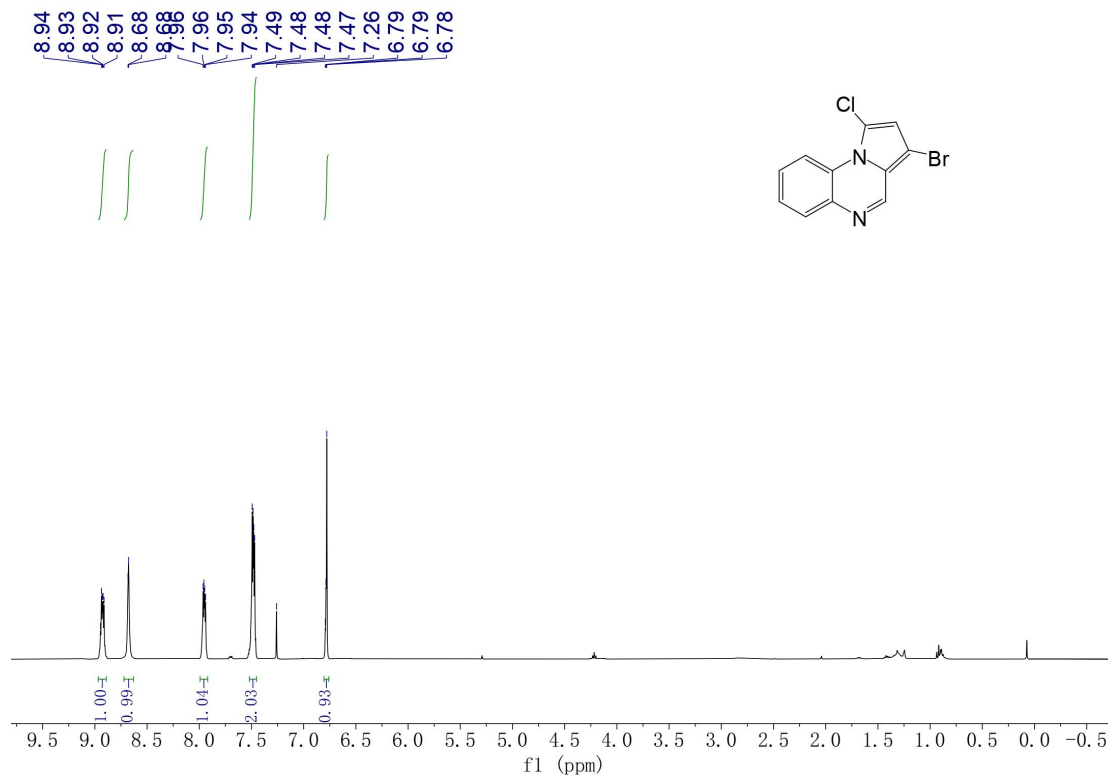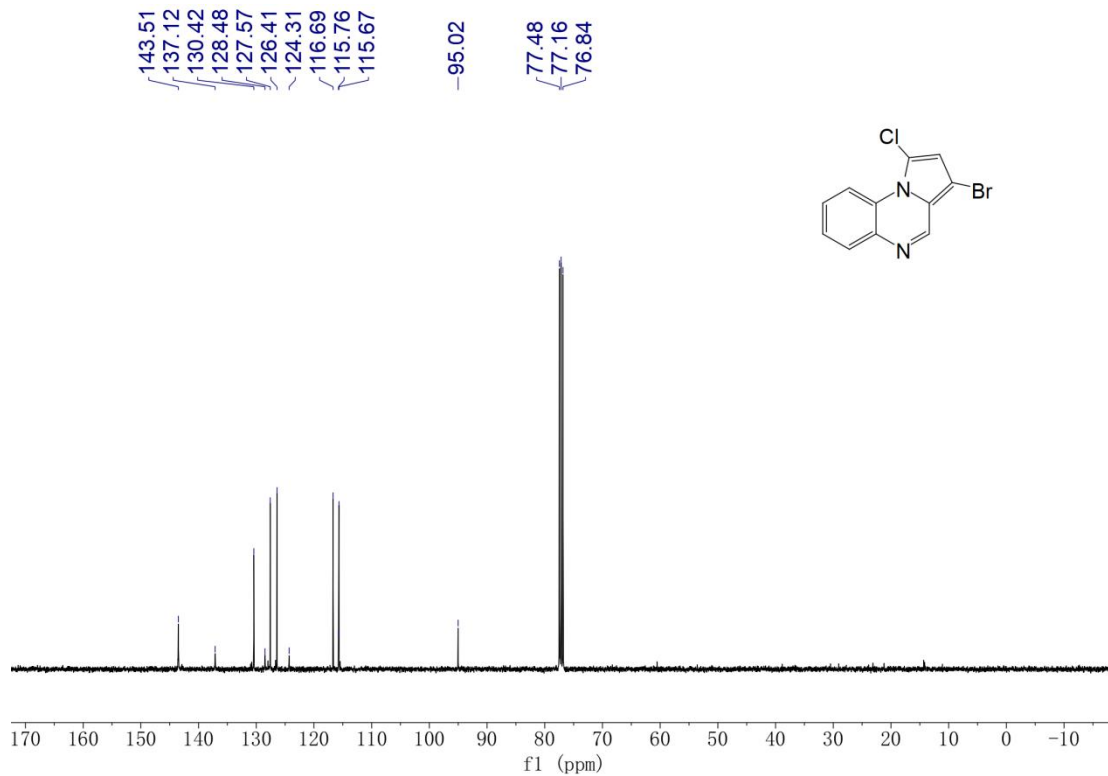

Supplement: d4ra07358d1.pdf [file d4ra07358d1.pdf]
